# Supplementary material for: Convergent evolution of small molecule pheromones in Pristionchus nematodes
Source: eLife journal article supplement (doi:10.7554/elife.55687), 2020-04-27
Supplement: supp [file elife-55687-supp-v1.zip]

Archive with 24 entries (24 files):
- elife_poa_e55687_Figure_2_source_data_1.xlsx
- elife_poa_e55687_Figure_6_source_data_1.xlsx
- elife_poa_e55687_Figure_1_figure_supplement_1.pdf
- elife_poa_e55687_Figure_3_figure_supplement_1.pdf
- elife_poa_e55687_Figure_3_figure_supplement_2.pdf
- elife_poa_e55687_Figure_3_figure_supplement_3.pdf
- elife_poa_e55687_Figure_3_figure_supplement_4.pdf
- elife_poa_e55687_Figure_4_figure_supplement_1.pdf
- elife_poa_e55687_Figure_4_figure_supplement_2.pdf
- elife_poa_e55687_Figure_4_figure_supplement_3.pdf
- elife_poa_e55687_Figure_4_figure_supplement_4.pdf
- elife_poa_e55687_Figure_4_figure_supplement_5.pdf
- elife_poa_e55687_Figure_5_figure_supplement_1.pdf
- elife_poa_e55687_Figure_5_figure_supplement_2.pdf
- elife_poa_e55687_Figure_5_figure_supplement_3.pdf
- elife_poa_e55687_Figure_5_figure_supplement_4.pdf
- elife_poa_e55687_Figure_5_figure_supplement_5.pdf
- elife_poa_e55687_Figure_6_figure_supplement_1.pdf
- elife_poa_e55687_Figure_7_figure_supplement_1.pdf
- elife_poa_e55687_Transparent_Reporting_File.pdf
- elife_poa_e55687_Supplementary_file_1.pdf
- elife_poa_e55687_Supplementary_file_2.pdf
- elife_poa_e55687_Supplementary_file_3.pdf
- elife_poa_e55687_Supplementary_file_4.pdf
