# Supplementary material for: Convergent evolution of small molecule pheromones in Pristionchus nematodes
Source: eLife journal article supplement (doi:10.7554/elife.55687), 2020-04-27
Supplement: supp [file elife-55687-supp-v1.zip › elife_poa_e55687_Figure_2_source_data_1.xlsx]

## Sheet: All ASCR-R
Normalized Area of Peaks Detected in					Simple ASCR											DASC										NPAR					PASC						simple UBAS									complex UBAS
Pristionchus Species	ascr#5	ascr#11	ascr#9	part#9	ascr#12	ascr#7	ascr#1	ascr#14	ascr#10		dasc#2	dasc#3	dasc#4	dasc#5	dasc#6	dasc#9	dasc#10	dasc#12	dasc#1	dasc#14	dasc#15	dasc#16	dasc#17		npar#1	npar#2	npar#3		pasc#9	pasc#12	pasc#1	pasa#9	paso#9		ubas#26	ubas#5	ubas#3	ubas#12	ubas#4		ubas#27	ubas#28	ubas#29	ubas#30	ubas#1	ubas#2	ubas#32	ubas#33	ubas#34
P. pacificus			0.149239	0.31816	0.029683		0.502917			P. pacificus			0.119224		0.0416357	0.340494			0.498647					P. pacificus	0.622839	0.279331	0.0978294	P. pacificus	0.625668	0.30252	0.0318594	0.0196806	0.0202726	P. pacificus		0.0299237	0.645878	0.167763	0.156436	P. pacificus					0.707174	0.292826
P. exspectatus		0.00537212	0.321918	0.225741	0.0203853		0.30075		0.125834	P. exspectatus			0.49228				0.50772							P. exspectatus	0.786626	0.172877	0.0404968	P. exspectatus	0.752486	0.143235			0.104279	P. exspectatus	0.23306	0.375445	0.391495			P. exspectatus					1
P. occultus			0.211099	0.148525	0.0330038		0.222296		0.385077	P. occultus			0.408356			0.376565			0.215078					P. occultus	0.756708	0.243292		P. occultus	0.550859	0.303999	0.0251345	0.0738415	0.0461655	P. occultus						P. occultus
P. sikae		0.0028912	0.173176	0.220228	0.0494248		0.15432	0.0131083	0.386852	P. sikae			0.857727		0.142273									P. sikae	0.301387	0.698613		P. sikae	0.685658	0.213341		0.0558739	0.0451275	P. sikae			1			P. sikae					0.262224	0.737776
P. arcanus			0.20409	0.0904068	0.0224849		0.386047		0.296971	P. arcanus			0.676227		0.0415972		0.22394		0.0582357					P. arcanus	0.441095	0.558905		P. arcanus	0.824811	0.10807	0.067119			P. arcanus						P. arcanus					1
P. kurosawai		0.00338361	0.218928	0.184521	0.0325848		0.461027	0.0107935	0.0887624	P. kurosawai			0.66734		0.0272245	0.151331			0.154104					P. kurosawai	0.616214	0.181398	0.202387	P. kurosawai	0.706328	0.137282	0.0990718	0.0195849	0.0377334	P. kurosawai			1			P. kurosawai					0.641337	0.358663
P. taiwanensis			0.305715	0.140463	0.0453857		0.232071		0.276364	P. taiwanensis			0.812591		0.060815		0.0942734		0.0323202					P. taiwanensis	0.462882	0.498657	0.0384616	P. taiwanensis	0.767814	0.172349	0.0143996	0.00458577	0.0408516	P. taiwanensis			1			P. taiwanensis					1
P. laevicollis		0.0029102	0.088908	0.102378	0.0165202		0.322962		0.466322	P. laevicollis			0.510345		0.0635162		0.284494		0.141645					P. laevicollis				P. laevicollis	0.93493	0.06507				P. laevicollis		0.0556365	0.753628	0.0136353	0.1771	P. laevicollis					0.868862	0.131138
P. maxplancki			0.187856		0.0215851		0.537474	0.0113074	0.241777	P. maxplancki			0.195122				0.624699		0.180178					P. maxplancki				P. maxplancki	0.606259	0.393741				P. maxplancki			0.842655	0.0171517	0.140194	P. maxplancki				0.787435		0.0808927	0.131672
P. japonicus	0.0087934	0.00690755	0.307927		0.0158305		0.231485		0.429057	P. japonicus			1											P. japonicus				P. japonicus	0.97878	0.0212195				P. japonicus						P. japonicus
P. riukiariae		0.00693733	0.108442		0.0529602		0.8031	0.0114947	0.0170657	P. riukiariae			0.112987		0.335424		0.483972		0.067617					P. riukiariae				P. riukiariae						P. riukiariae						P. riukiariae
P. neolucani		0.00357388	0.255035		0.0268549		0.693762	0.00519262	0.0155814	P. neolucani									1					P. neolucani				P. neolucani						P. neolucani						P. neolucani
P. degawai	0.00412315	0.016959	0.0888391		0.0555706		0.775818	0.0189572	0.0397334	P. degawai		0.0433397	0.318857		0.121164	0.102287	0.23926		0.175091					P. degawai				P. degawai						P. degawai	0.207983	0.792017				P. degawai			1
P. hongkongensis		0.00411284	0.0354691		0.051785		0.631745	0.00849654	0.268391	P. hongkongnensis									1					P. hongkongnensis				P. hongkongnensis						P. hongkongnensis						P. hongkongnensis
P. quartusdecimus		0.0435665	0.0302868		0.0634549		0.716437	0.120626	0.0256289	P. quartusdecimus	0.499609								0.500391					P. quartusdecimus				P. quartusdecimus						P. quartusdecimus		0.727511	0.112744	0.116218	0.0435265	P. quartusdecimus								0.020144	0.907489
P. aerivorus			0.52381		0.0731592		0.403031			P. aerivorus				0.660458		0.241467			0.0980747					P. aerivorus				P. aerivorus						P. aerivorus						P. aerivorus
P. marianneae			0.462528		0.0832128		0.419204	0.0190442	0.0160106	P. marianneae				0.36136	0.105318	0.506938			0.0263843					P. marianneae				P. marianneae						P. marianneae						P. marianneae
P. maupasi			0.633387		0.0866263		0.279986			P. maupasi			0.769396			0.230604								P. maupasi				P. maupasi						P. maupasi						P. maupasi
P. boliviae			0.266593		0.0741615		0.628811	0.0175718	0.0128625	P. boliviae				0.217902	0.10305	0.44825		0.110197	0.120602					P. boliviae				P. boliviae						P. boliviae						P. boliviae
P. mayeri			0.521549		0.0625684		0.415883			P. mayeri				0.305294	0.0245783		0.516698	0.0603817	0.093047					P. mayeri				P. mayeri						P. mayeri						P. mayeri
P. americanus			0.283986		0.0709342		0.64508			P. americanus			0.30992		0.0310126		0.407404	0.179002	0.0726611					P. americanus				P. americanus						P. americanus						P. americanus
P. atlanticus			0.506376		0.0774275		0.298676		0.0389633	P. atlanticus			1											P. atlanticus				P. atlanticus						P. atlanticus						P. atlanticus
P. brevicauda	0.00685907	0.00868297	0.207091		0.0311091	0.544499	0.180357	0.0106884	0.0107135	P. brevicauda			0.25098		0.0355166					0.252113	0.0415795	0.0888832	0.330928	P. brevicauda				P. brevicauda						P. brevicauda						P. brevicauda
P. bulgaricus		0.00237738	0.121864		0.025725	0.177004	0.61522	0.020114	0.0376956	P. bulgaricus			0.0653391		0.0186178				0.357616	0.0100317	0.00467317	0.327609	0.216114	P. bulgaricus				P. bulgaricus						P. bulgaricus						P. bulgaricus
P. uniformis	0.00855581	0.0143953	0.12579		0.0272051	0.535593	0.251552	0.0231325	0.0137766	P. uniformis										0.124337	0.04083	0.195628	0.639206	P. uniformis				P. uniformis						P. uniformis						P. uniformis
P. entomophagus	0.0147038	0.013312	0.576326		0.267456	0.0809201	0.0472815			P. entomophagus			0.523363		0.159446					0.267457	0.0245041	0.0085357	0.0166935	P. entomophagus				P. entomophagus						P. entomophagus						P. entomophagus
P. fukushimae	0.00383004	0.0755719	0.176954		0.0464095		0.195641		0.501594	P. fukushimae	0.0497325	0.570564	0.167583						0.21212					P. fukushimae				P. fukushimae						P. fukushimae		0.920837	0.0791628			P. fukushimae	0.0216833	0.867009		0.111308
P. triformis		0.0551645	0.0513105		0.102159		0.791366			P. triformis									1					P. triformis				P. triformis						P. triformis	0.0424783	0.899035		0.0229119	0.0355749	P. triformis
P. yamagatae		0.00786186	0.184353		0.0329132		0.764665		0.010207	P. yamagatae			0.156128				0.824546		0.0193256					P. yamagatae				P. yamagatae	0.895928	0.0822166	0.0218556			P. yamagatae						P. yamagatae
P. bucculentus			0.10087		0.0309522		0.797601	0.0342028	0.036374	P. bucculentus									1					P. bucculentus				P. bucculentus						P. bucculentus						P. bucculentus
P. paulseni			0.0439747		0.0226178		0.876825	0.0218621	0.0347207	P. paulseni									1					P. paulseni				P. paulseni						P. paulseni						P. paulseni
P. fissidentatus			0.0451272		0.0335431		0.92133			P. fissidentatus														P. fissidentatus				P. fissidentatus						P. fissidentatus						P. fissidentatus
Area of Peaks Detected in					Simple ASCR											DASC										NPAR					PASC						simple UBAS									complex UBAS
Pristionchus Species	ascr#5	ascr#11	ascr#9	part#9	ascr#12	ascr#7	ascr#1	ascr#14	ascr#10		dasc#2	dasc#3	dasc#4	dasc#5	dasc#6	dasc#9	dasc#10	dasc#12	dasc#1	dasc#14	dasc#15	dasc#16	dasc#17		npar#1	npar#2	npar#3		pasc#9	pasc#12	pasc#1	pasa#9	paso#9		ubas#26	ubas#5	ubas#3	ubas#12	ubas#4		ubas#27	ubas#28	ubas#29	ubas#30	ubas#1	ubas#2	ubas#32	ubas#33	ubas#34
P. pacificus			853750	1.82009e+06	169807		2.87702e+06			P. pacificus			54886.7		19167.7	156752			229560					P. pacificus	251845	112948	39557.3	P. pacificus	1.23442e+06	596861	62857.3	38829	39997	P. pacificus		19453	419876	109060	101697	P. pacificus					317190	131342
P. exspectatus		36421.5	2.18251e+06	1.53046e+06	138206		2.039e+06		853119	P. exspectatus			146931				151539							P. exspectatus	132578	29136.8	6825.33	P. exspectatus	171193	32586.4			23723.9	P. exspectatus	19863.8	31999.4	33367.3			P. exspectatus					11553.7
P. occultus			1.77016e+06	1.24544e+06	276751		1864048		3.22904e+06	P. occultus			61172.3			56410			32219					P. occultus	315303	101374		P. occultus	400041	220768	18253	53624.7	33526	P. occultus						P. occultus
P. sikae		23818	1.42664e+06	1.81426e+06	407167		1.2713e+06	107988	3186929	P. sikae			982102		162904									P. sikae	75843	175804		P. sikae	834990	259806		68043	54956	P. sikae			486672			P. sikae					96230.3	270747
P. arcanus			1.81945e+06	805975	200452		3.4416e+06		2.64749e+06	P. arcanus			735420		45238.3		243542		63333.3					P. arcanus	127054	160988		P. arcanus	374480	49066	30473.3			P. arcanus						P. arcanus					13164.3
P. kurosawai		26221.7	1696606	1.42997e+06	252520		3.57279e+06	83645.7	687875	P. kurosawai			571753		23325	129655			132031					P. kurosawai	204309	60143.7	67102.7	P. kurosawai	626070	121683	87814.6	17359.5	33445.8	P. kurosawai			388575			P. kurosawai					54173.3	30296
P. taiwanensis			1.43998e+06	661609	213776		1.0931e+06		1301732	P. taiwanensis			482134		36083.3		55935.2		19176.5					P. taiwanensis	231830	249748	19263.2	P. taiwanensis	1.01175e+06	227104	18974.4	6042.67	53830.1	P. taiwanensis			77260			P. taiwanensis					21565.1
P. laevicollis		33641.3	1.02776e+06	1.18347e+06	190971		3.73338e+06		5.39059e+06	P. laevicollis			973949		121215		542931		270316					P. laevicollis				P. laevicollis	437268	30433.3				P. laevicollis		61165.3	828519	14990.3	194699	P. laevicollis					438422	66171.7
P. maxplancki			947388		108857		2.71057e+06	57025	1.21932e+06	P. maxplancki			226396				724825		209057					P. maxplancki				P. maxplancki	24535	15934.5				P. maxplancki			1432717	29162	238364	P. maxplancki				283794		29154	47455
P. japonicus	37882.3	29758	1.32656e+06		68198.3		997245		1.84839e+06	P. japonicus			17952											P. japonicus				P. japonicus	400120	8674.43				P. japonicus						P. japonicus
P. riukiariae		54407.3	850479		415350		6.29846e+06	90149	133841	P. riukiariae			151160		448749		647485		90461.7					P. riukiariae				P. riukiariae						P. riukiariae						P. riukiariae
P. neolucani		27681.7	1.97538e+06		208006		5.37357e+06	40219.7	120687	P. neolucani									89735					P. neolucani				P. neolucani						P. neolucani						P. neolucani
P. degawai	29340.7	120682	632187		395445		5.52078e+06	134901	282746	P. degawai		53731.7	395312		150217	126814	296630		217074					P. degawai				P. degawai						P. degawai	27377.7	104256				P. degawai			175642
P. hongkongensis		25881.9	223206		325881		3.97555e+06	53468.5	1.68898e+06	P. hongkongnensis									28710.4					P. hongkongnensis				P. hongkongnensis						P. hongkongnensis						P. hongkongnensis
P. quartusdecimus		132273	91954.7		192657		2.17519e+06	366237	77812.7	P. quartusdecimus	343656								344193					P. quartusdecimus				P. quartusdecimus						P. quartusdecimus		395949	61361	63252	23689.3	P. quartusdecimus								20860	939743
P. aerivorus			409365		57175		314975			P. aerivorus				629328		230086			93452					P. aerivorus				P. aerivorus						P. aerivorus						P. aerivorus
P. marianneae			1.23146e+06		221551		1.11611e+06	50704.3	42627.7	P. marianneae				393116	114573	551488			28703					P. marianneae				P. marianneae						P. marianneae						P. marianneae
P. maupasi			248713		34015.7		109943			P. maupasi			119896			35935.3								P. maupasi				P. maupasi						P. maupasi						P. maupasi
P. boliviae			1.07652e+06		299469		2.53918e+06	70956.2	51939.7	P. boliviae				108403	51265.7	222998		54821.2	59997.7					P. boliviae				P. boliviae						P. boliviae						P. boliviae
P. mayeri			867595		104082		691820			P. mayeri				158973	12798.4		269055	31442	48451.4					P. mayeri				P. mayeri						P. mayeri						P. mayeri
P. americanus			150297		37541.4		341403			P. americanus			99328.3		9939.4		130571	57369.3	23287.6					P. americanus				P. americanus						P. americanus						P. americanus
P. atlanticus			931244		142392		549275		71655	P. atlanticus			249975											P. atlanticus				P. atlanticus						P. atlanticus						P. atlanticus
P. brevicauda	19069	24139.7	575738		86487	1.51377e+06	501413	29715	29784.7	P. brevicauda			73787.1		10441.7					74120.2	12224.2	26131.3	97291.3	P. brevicauda				P. brevicauda						P. brevicauda						P. brevicauda
P. bulgaricus		12555	643568		135854	934762	3.249e+06	106223	199071	P. bulgaricus			108550		30930.3				594117	16666	7763.67	544266	359036	P. bulgaricus				P. bulgaricus						P. bulgaricus						P. bulgaricus
P. uniformis	21571	36293.7	317143		68589.7	1350341	634216	58322	34733.7	P. uniformis										58552.7	19227.7	92125	301015	P. uniformis				P. uniformis						P. uniformis						P. uniformis
P. entomophagus	34524.3	31256.3	1353202		627982	189999	111016			P. entomophagus			1.43231e+06		436363					731962	67061.3	23360	45685.7	P. entomophagus				P. entomophagus						P. entomophagus						P. entomophagus
P. fukushimae	23612.7	465910	1090941		286120		1.20615e+06		3.09239e+06	P. fukushimae	14715.6	168827	49587						62765.3					P. fukushimae				P. fukushimae						P. fukushimae		917532	78878.7			P. fukushimae	11481.3	459080		58937.3
P. triformis		54906	51070		101680		787657			P. triformis									56494					P. triformis				P. triformis						P. triformis	31527	667255		17005	26403.3	P. triformis
P. yamagatae		34006	797406		142364		3307513		44149.7	P. yamagatae			124535				657698		15415					P. yamagatae				P. yamagatae	822061	75438	20053.7			P. yamagatae						P. yamagatae
P. bucculentus			98399		30194		778064	33365	35483	P. bucculentus									48571					P. bucculentus				P. bucculentus						P. bucculentus						P. bucculentus
P. paulseni			256768		132065		5.11977e+06	127652	202734	P. paulseni									520683					P. paulseni				P. paulseni						P. paulseni						P. paulseni
P. fissidentatus			88909.7		66086.7		1815205			P. fissidentatus														P. fissidentatus				P. fissidentatus						P. fissidentatus						P. fissidentatus
[truncated: 2 more columns]
