# Supplementary material for: Convergent evolution of small molecule pheromones in Pristionchus nematodes
Source: eLife journal article supplement (doi:10.7554/elife.55687), 2020-04-27

*N*-acyl-4-hydroxyanthranilic acid  
(1, 2, 4-trisubstituted)

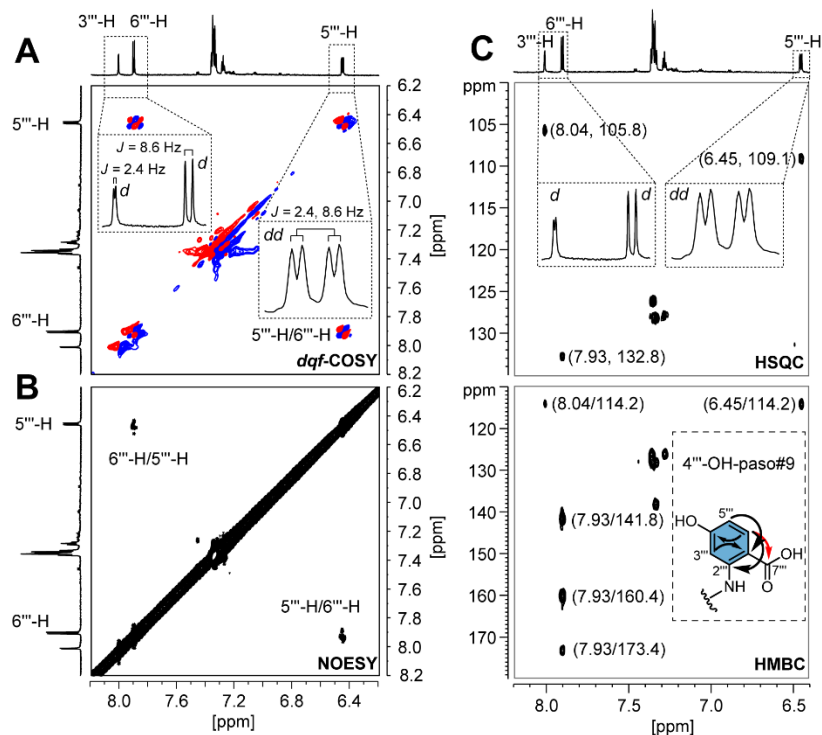

*N*-acyl-5-hydroxyanthranilic acid  
(1, 2, 5-trisubstituted)

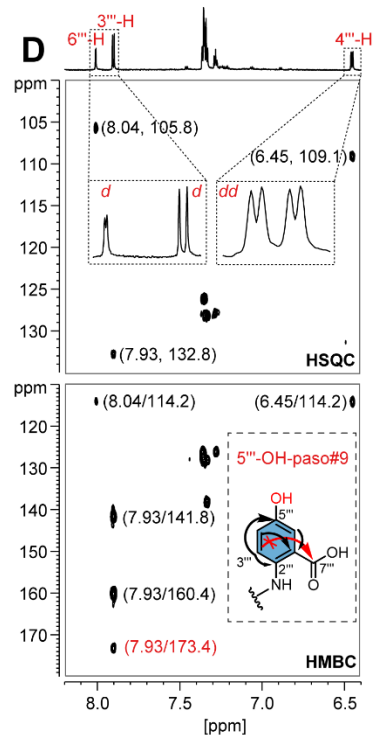

Supplement: supp [file elife-55687-supp-v1.zip › elife_poa_e55687_Figure_5_figure_supplement_1.pdf]
