# Supplementary material for: Convergent evolution of small molecule pheromones in Pristionchus nematodes
Source: eLife journal article supplement (doi:10.7554/elife.55687), 2020-04-27
Supplement: supp [file elife-55687-supp-v1.zip › elife_poa_e55687_Figure_6_source_data_1.xlsx]

## Sheet: All ASCR-R
Normalized Area of Peaks Detected in					Simple ASCR
(Non-Pristionchus) Diplogastride species	ascr#5	ascr#11	ascr#9	ascr#12	ascr#1	ascr#14	ascr#10	ascr#18	dasc#5	dasc#1	unknown
Micoletzkya japonicus			1
Parapristionchus giblindavisi		0.00928034	0.0586958	0.037384	0.885242			0.00939824
Fuchsnema sp.			0.721653			0.278347
Diplogasteroides magnus	0.00763286	0.0275959	0.315152	0.00696935	0.0337451	0.0206833	0.0365863		0.202206		0.349429
Acrostichus sp.			0.292469	0.0170482	0.374095		0.212941	0.103446
Allodiplogaster sudhausi					0.954581					0.0454193
Area of Peaks Detected in					Simple ASCR
(Non-Pristionchus) Diplogastride species	ascr#5	ascr#11	ascr#9	ascr#12	ascr#1	ascr#14	ascr#10	ascr#18	dasc#5	dasc#1	unknown
Micoletzkya japonicus			401616
Parapristionchus giblindavisi		137619	870403	554369	1.31273e+07			139367
Fuchsnema sp.			1703772			657157
Diplogasteroides magnus	68324.3	247020	2.82103e+06	62385	302064	185143	327496		3.03294e+06		3.12786e+06
Acrostichus sp.			800775	46677.5	1.02426e+06		583029	283233
Allodiplogaster sudhausi					1.61926e+06					77045
