# Supplementary material for: Convergent evolution of small molecule pheromones in Pristionchus nematodes
Source: eLife journal article supplement (doi:10.7554/elife.55687), 2020-04-27
Supplement: supp [file elife-55687-supp-v1.zip › elife_poa_e55687_Supplementary_file_2.pdf]

|                                                                     |              |
|---------------------------------------------------------------------|--------------|
| <b>supplementary file 2: MS/MS spectral data of NDMMs</b>           | <b>Pages</b> |
| <b>supplementary file 2a:</b> MS/MS spectral data of DASC chemicals | S2           |
| <b>supplementary file 2b:</b> MS/MS spectral data of PASC chemicals | S23          |
| <b>supplementary file 2c:</b> MS/MS spectral data of UBAS chemicals | S25          |
| <b>supplementary file 2d:</b> MS/MS spectral data of UPAS chemicals | S47          |
| <b>References</b>                                                   | S55          |

| <b>supplementary file 2a: MS/MS spectral data of DASC chemicals</b>                                                               | Pages |
|-----------------------------------------------------------------------------------------------------------------------------------|-------|
| <b>Figure 1.</b> LC-HR( $\text{ESI}^{-/+}$ )-MS/MS spectral data of dasc#3 [2'-(asc-C5)-asc-C4, <b>1</b> ].                       | S3    |
| <b>Figure 2.</b> LC-HR( $\text{ESI}^{-/+}$ )-MS/MS spectral data of dasc#4 ( <b>2</b> ) from <i>P. taiwanensis</i> .              | S4    |
| <b>Figure 3.</b> LC-HR( $\text{ESI}^{-/+}$ )-MS/MS spectral data of dasc#4 ( <b>2</b> ) from <i>P. entomophagus</i> .             | S5    |
| <b>Figure 4.</b> LC-HR( $\text{ESI}^{-/+}$ )-MS/MS spectral data of dasc#4 ( <b>2</b> ) from <i>P. pacificus</i> .                | S6    |
| <b>Figure 5.</b> LC-HR( $\text{ESI}^{-/+}$ )-MS/MS spectral data of dasc#5 ( <b>3</b> ) from <i>P. mayeri</i> .                   | S7    |
| <b>Figure 6.</b> LC-HR( $\text{ESI}^{-/+}$ )-MS/MS spectral data of dasc#5 ( <b>3</b> ) from <i>D. magnus</i> .                   | S8    |
| <b>Figure 7.</b> LC-HR( $\text{ESI}^{-/+}$ )-MS/MS spectral data of dasc#6 [2'-(asc-C6)-asc-C5, <b>4</b> ].                       | S9    |
| <b>Figure 8.</b> LC-HR( $\text{ESI}^{-/+}$ )-MS/MS spectral data of dasc#9 [2'-(asc-C7)-asc-C5].                                  | S10   |
| <b>Figure 9.</b> LC-HR( $\text{ESI}^{-/+}$ )-MS/MS spectral data of dasc#10 [4'-(asc-C5)-asc-C7, <b>5</b> ].                      | S11   |
| <b>Figure 10.</b> LC-HR( $\text{ESI}^{-/+}$ )-MS/MS spectral data of dasc#12 [4'-(asc-C6)-asc-C7].                                | S12   |
| <b>Figure 11.</b> LC-HR( $\text{ESI}^{-/+}$ )-MS/MS spectral data of dasc#1 [4'-(asc-C7)-asc-C7].                                 | S13   |
| <b>Figure 12.</b> LC-HR( $\text{ESI}^{-/+}$ )-MS/MS spectral data of dasc#2 [2'/4'-(asc-C4)-asc-C4].                              | S14   |
| <b>Figure 13.</b> LC-HR( $\text{ESI}^{-/+}$ )-MS/MS spectral data of dasc#7 [2'/4'-(asc-C7)-asc-C4].                              | S15   |
| <b>Figure 14.</b> LC-HR( $\text{ESI}^{-/+}$ )-MS/MS spectral data of dasc#8 [2'/4'-(asc-C6)-asc-C6].                              | S16   |
| <b>Figure 15.</b> LC-HR( $\text{ESI}^{-/+}$ )-MS/MS spectral data of dasc#11 [2'/4'-(asc-C7)-asc-C6].                             | S17   |
| <b>Figure 16.</b> LC-HR( $\text{ESI}^{-/+}$ )-MS/MS spectral data of dasc#13 [2'/4'-(asc-C5)-asc-C9].                             | S18   |
| <b>Figure 17.</b> LC-HR( $\text{ESI}^{-/+}$ )-MS/MS spectral data of dasc#14 [4'-(asc- $\Delta$ C7)-asc-C5, <b>6</b> ].           | S19   |
| <b>Figure 18.</b> LC-HR( $\text{ESI}^{-/+}$ )-MS/MS spectral data of dasc#15 [4'-(asc- $\Delta$ C7)-asc-C6].                      | S20   |
| <b>Figure 19.</b> LC-HR( $\text{ESI}^{-/+}$ )-MS/MS spectral data of dasc#16 [4'-(asc- $\Delta$ C7)-asc-C7, <b>7</b> ].           | S21   |
| <b>Figure 20.</b> LC-HR( $\text{ESI}^{-/+}$ )-MS/MS spectral data of dasc#17 [4'-(asc- $\Delta$ C7)-asc- $\Delta$ C7, <b>8</b> ]. | S22   |

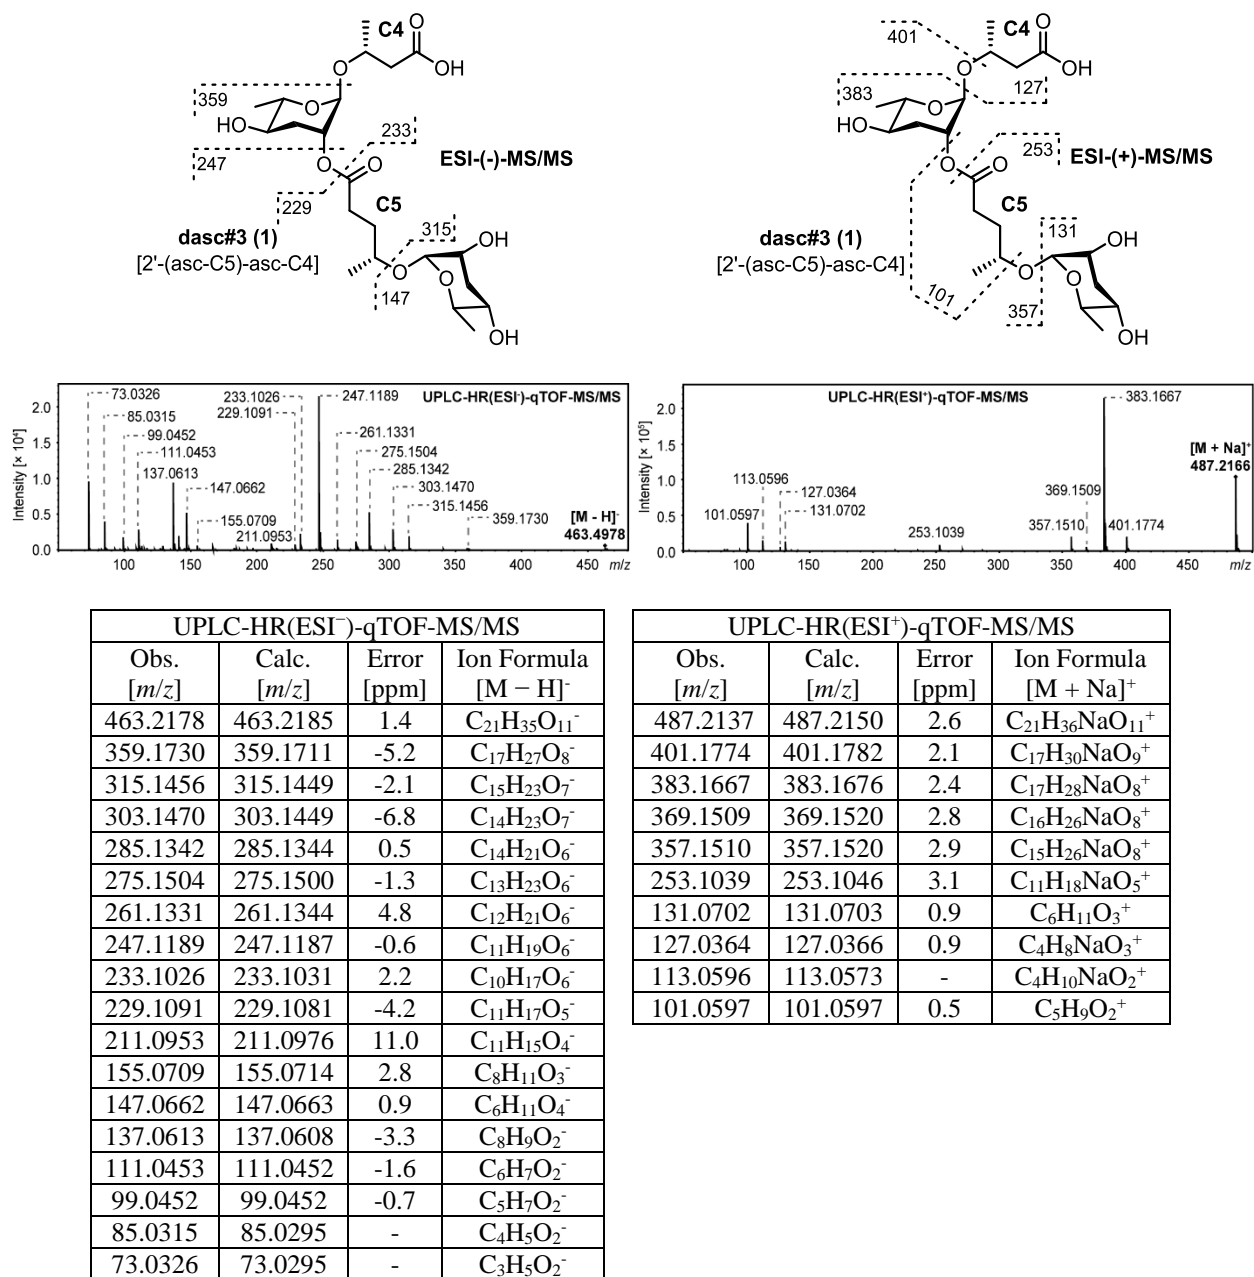

**Figure 1.** UPLC-HR(ESI<sup>±</sup>)-qTOF-MS/MS mass spectral data of dasc#3 [2'-(asc-C5)-asc-C4, **1**] in both negative and positive ion modes. MS/MS fragmentation in positive ion mode produced an intensive ion signal of C<sub>17</sub>H<sub>28</sub>NaO<sub>8</sub><sup>+</sup> ( $m/z = 383.1667$ ) suggesting that the first ascaroside (LC-MS/MS fragmentation pattern of dimeric ascarosides were described in **Figure 4 – figure supplement 1C**) in dasc#3 [2'-(asc-C5)-asc-C4, **1**] should be ascr#9 [asc-C5] or oasc#9 [asc-ωC5] (*von Reuss et al., 2012*). *dqf*-COSY spectrum of an HPLC enriched sample containing dasc#3 [2'-(asc-C5)-asc-C4, **1**] confirmed that a unit of ascr#9 [asc-C5] was linked the 2'-position of ascr#11 [asc-C4] (*supplementary file 1b – Figure 1*).

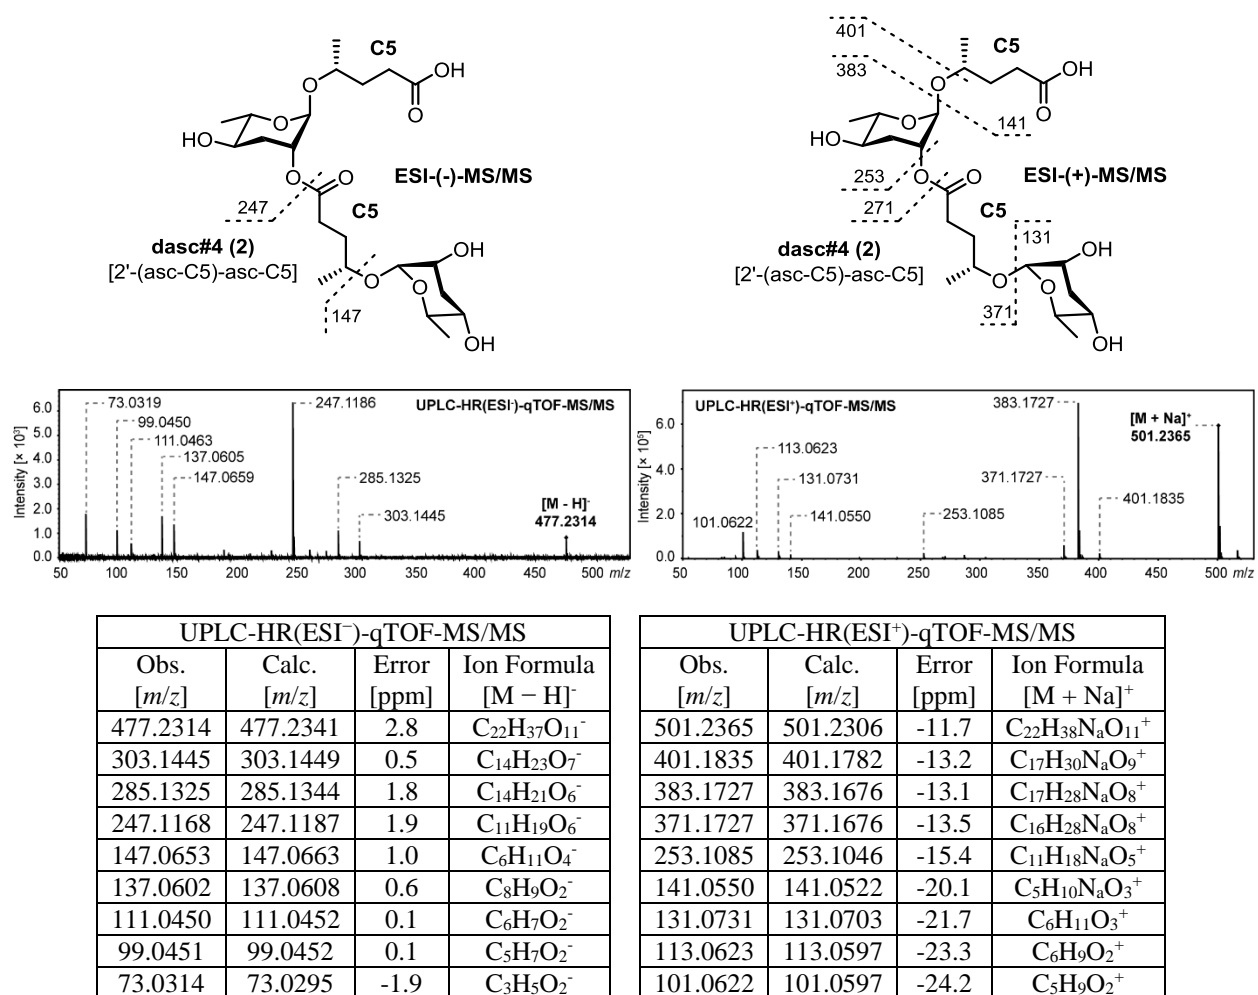

**Figure 2.** UPLC-HR(ESI<sup>±</sup>)-qTOF-MS/MS mass spectral data of dasc#4 [2'-(asc-C5)-asc-C5, 2] from *P. taiwanensis* in both negative and positive ion modes.

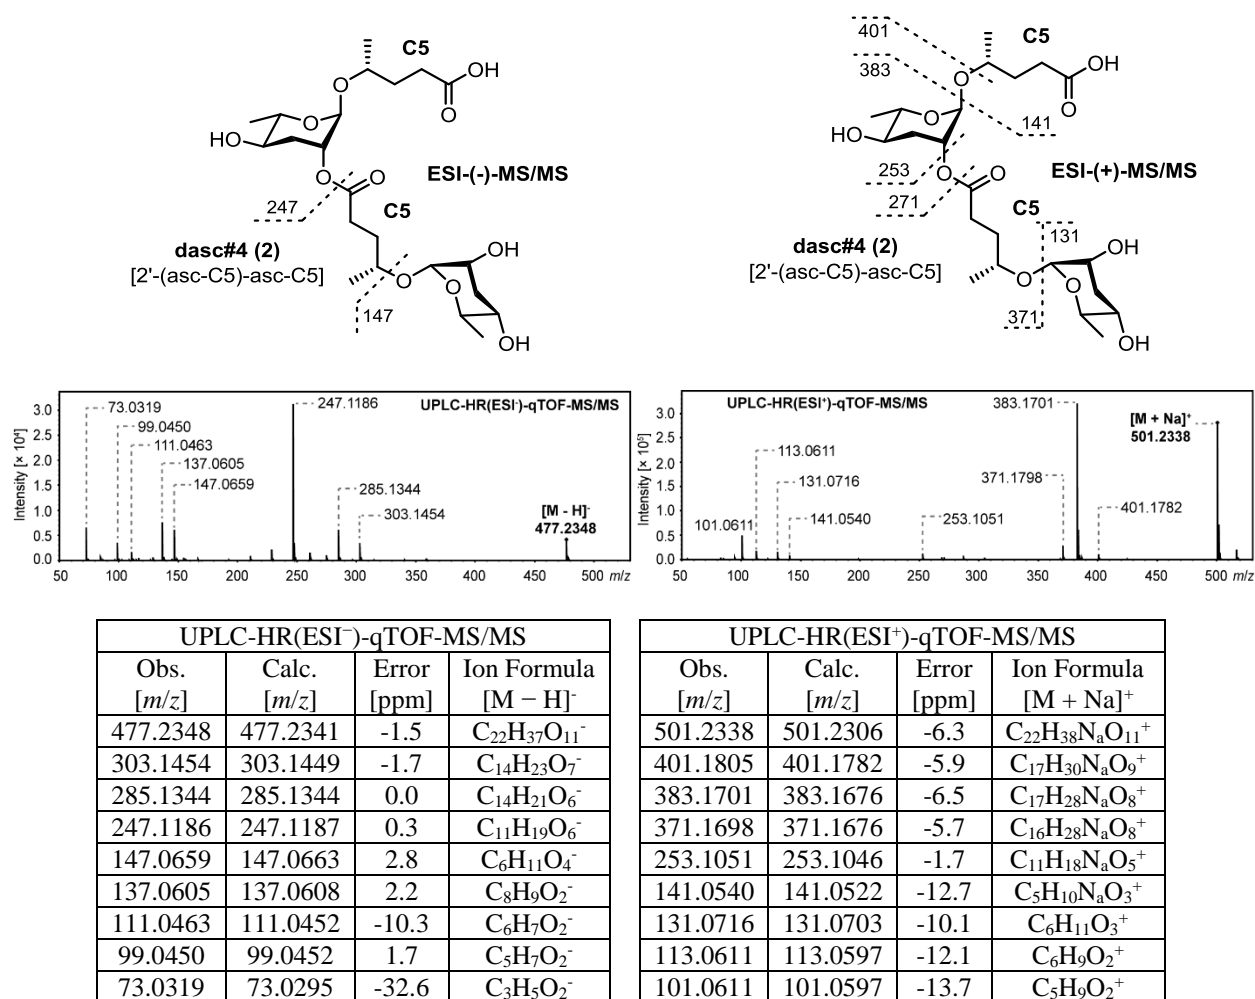

**Figure 3.** UPLC-HR(ESI<sup>±</sup>)-qTOF-MS/MS mass spectral data of dasc#4 [2'-(asc-C5)-asc-C5, 2] from *P. entomophagus* in both negative and positive ion modes.

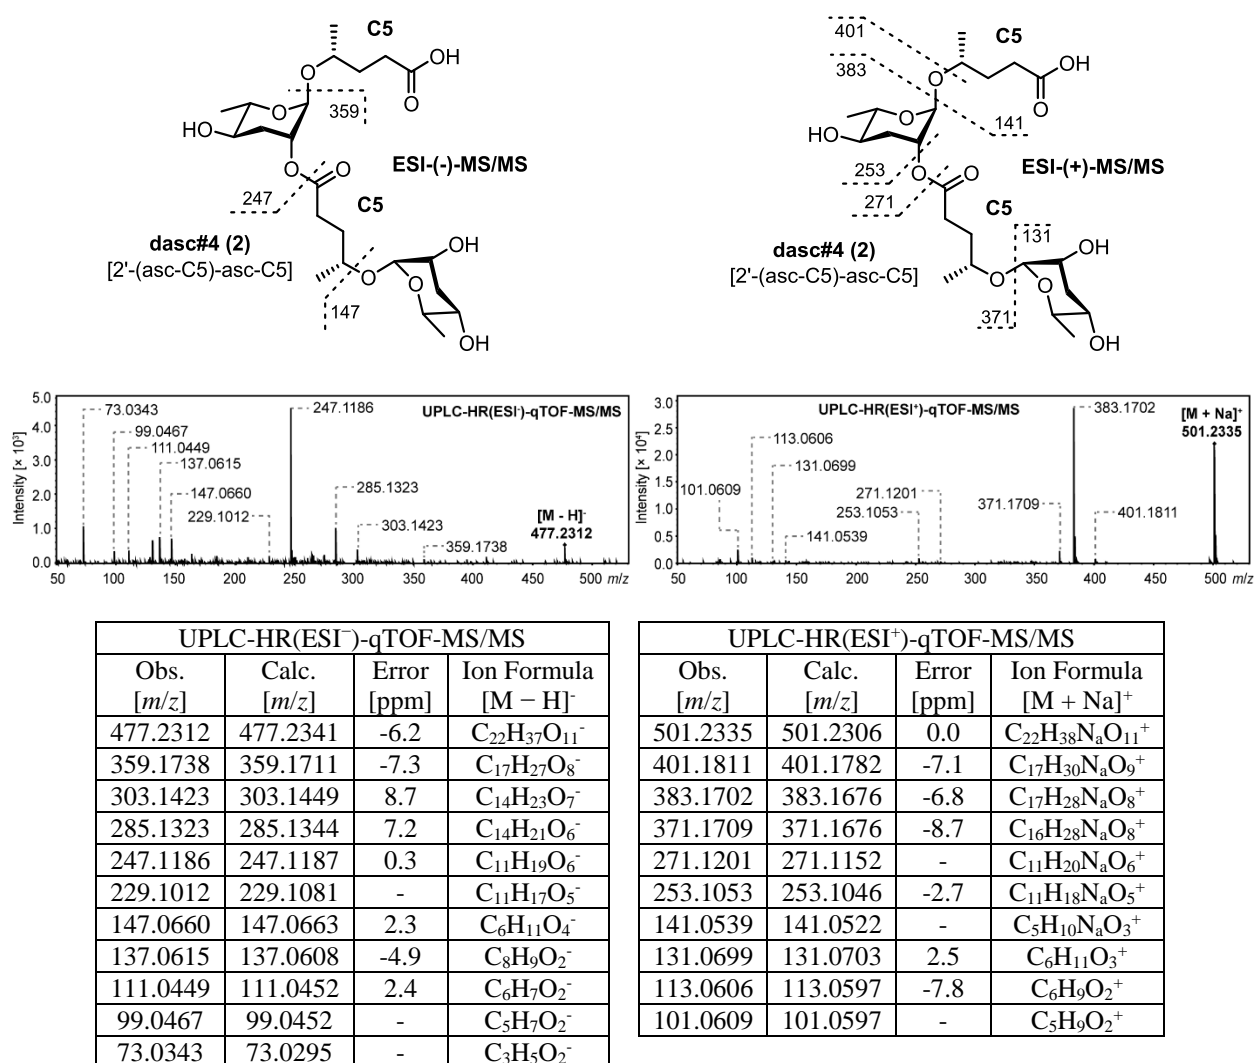

**Figure 4.** UPLC-HR(ESI<sup>±</sup>)-qTOF-MS/MS mass spectral data of dasc#4 [2'-(asc-C5)-asc-C5, 2] from *P. pacificus* RS2333 in both negative and positive ion modes.

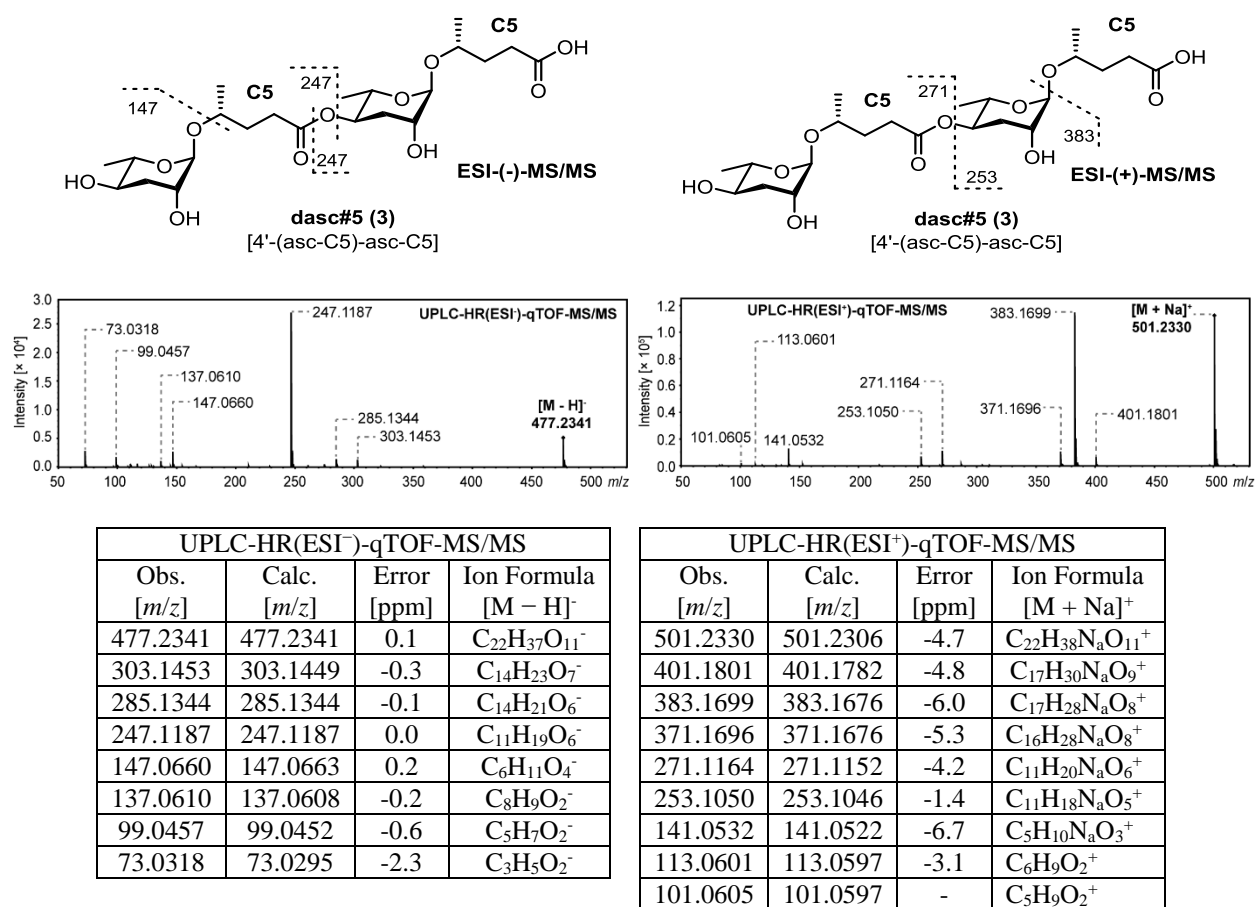

**Figure 5.** UPLC-HR(ESI<sup>-/+</sup>)-qTOF-MS/MS mass spectral data of dasc#5 [4'-(asc-C5)-asc-C5, 3] from *P. mayeri* in both negative and positive ion modes.

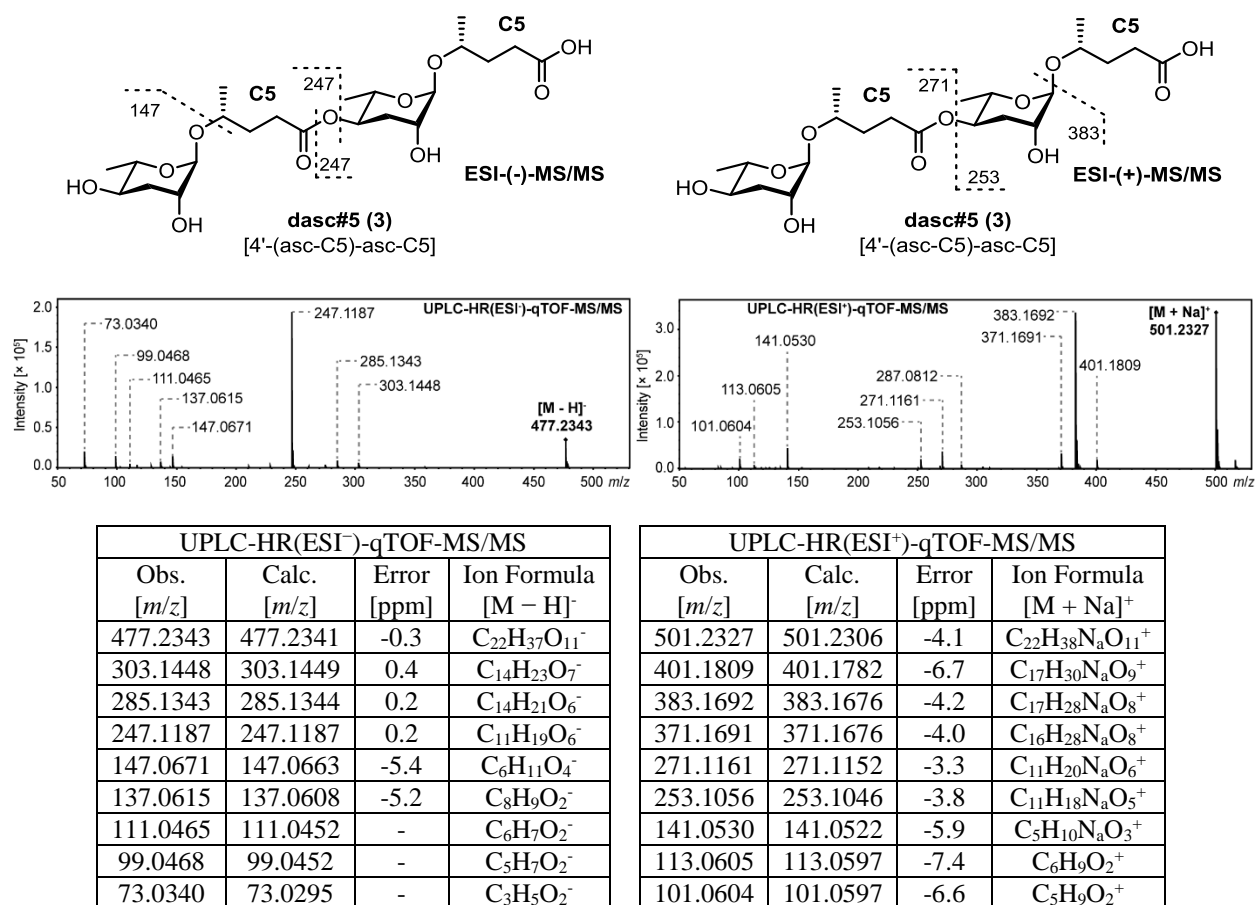

**Figure 6.** UPLC-HR(ESI<sup>±</sup>)-qTOF-MS/MS mass spectral data of dasc#5 [4'-(asc-C5)-asc-C5, 3] from *D. magnus* in both negative and positive ion modes.

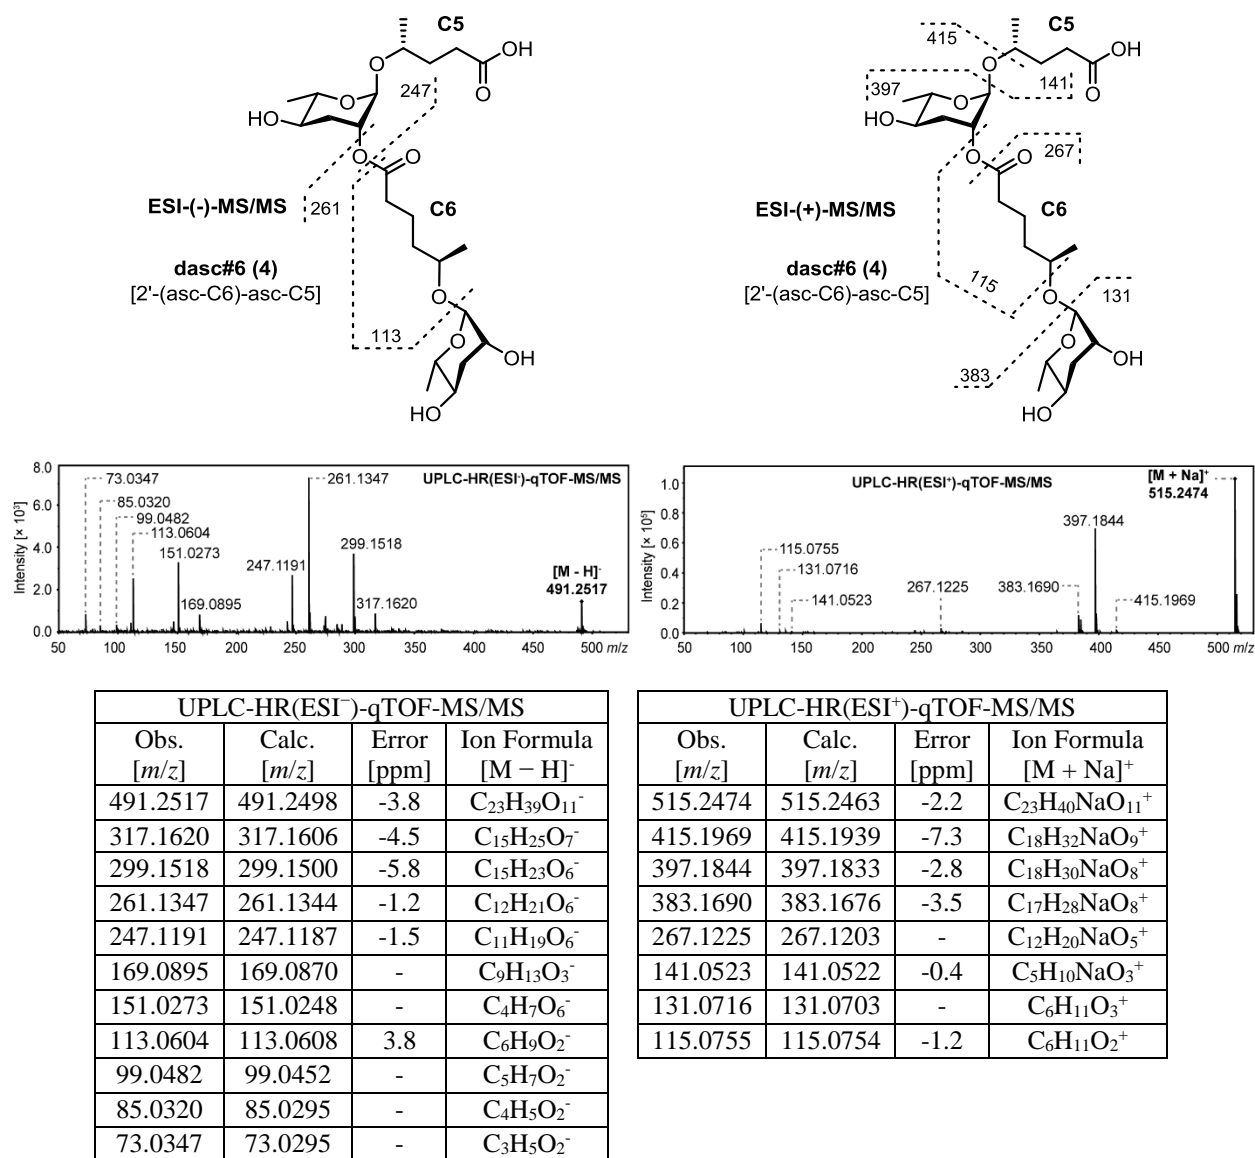

**Figure 7.** UPLC-HR(ESI<sup>±</sup>)-qTOF-MS/MS mass spectral data of dasc#6 [2'-(asc-C6)-asc-C5, 4] in both negative and positive ion modes.

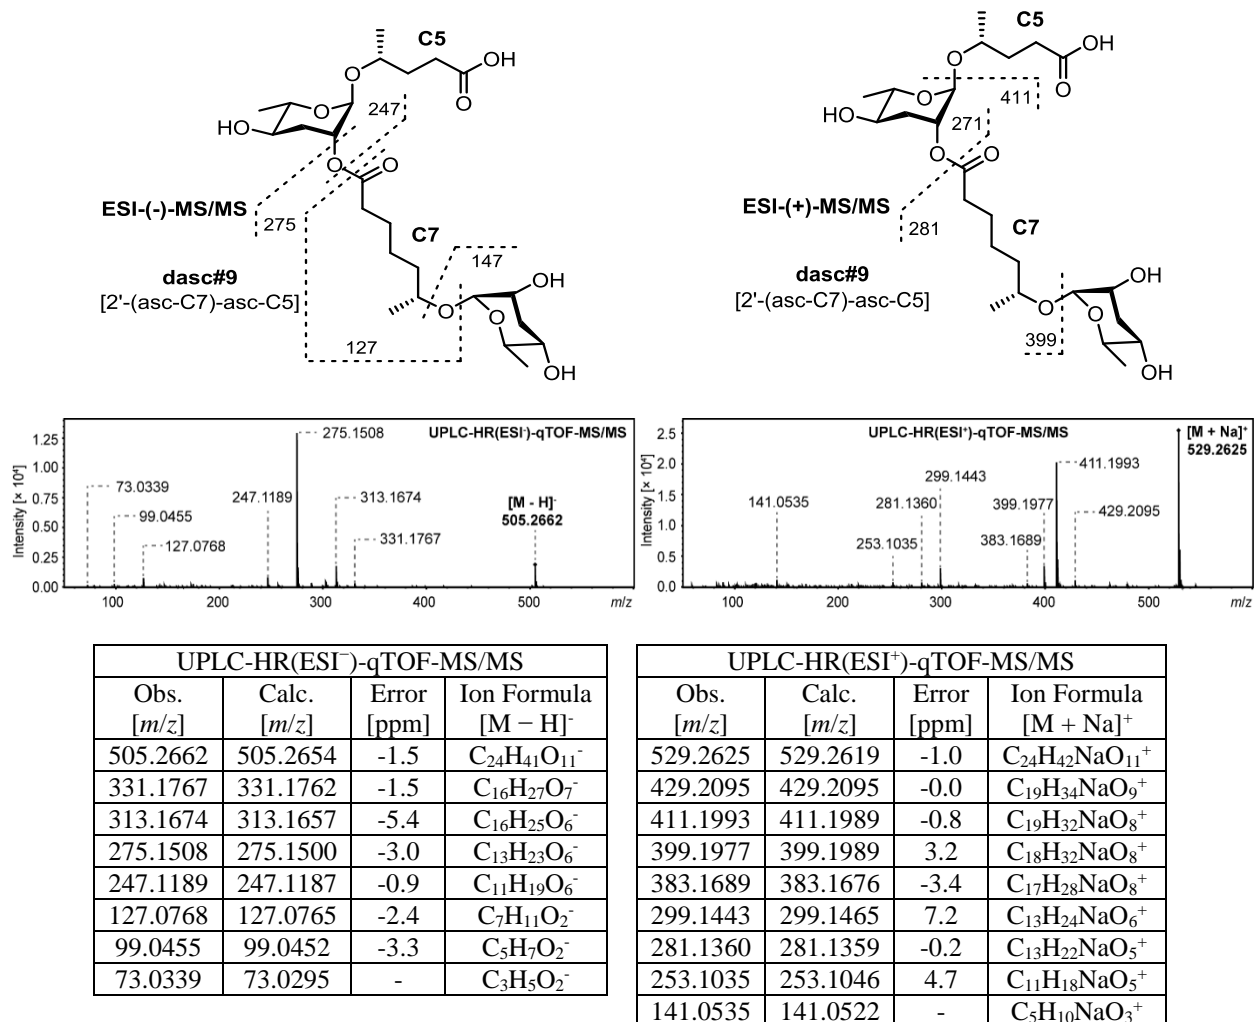

**Figure 8.** UPLC-HR(ESI<sup>±</sup>)-qTOF-MS/MS mass spectral data of dasc#9 [2'-(asc-C7)-asc-C5] in both negative and positive ion modes. Note that dasc#9 [2'-(asc-C7)-asc-C5] is tentatively assigned to be linked at the 2'-position, but its final structure has not yet been elucidated.

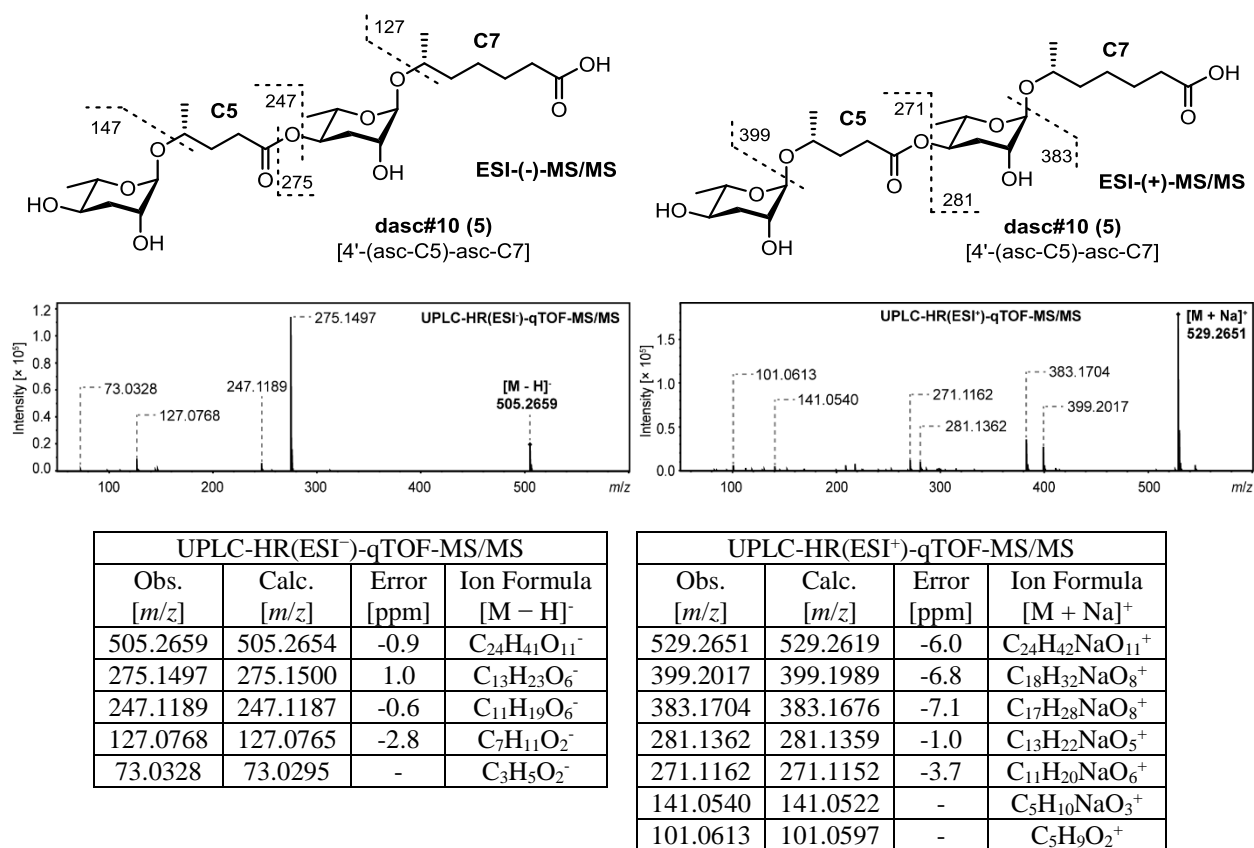

**Figure 9.** UPLC-HR(ESI<sup>+/+</sup>)-qTOF-MS/MS mass spectral data of dasc#10 [4'-(asc-C5)-asc-C7, **5**] in both negative and positive ion modes.

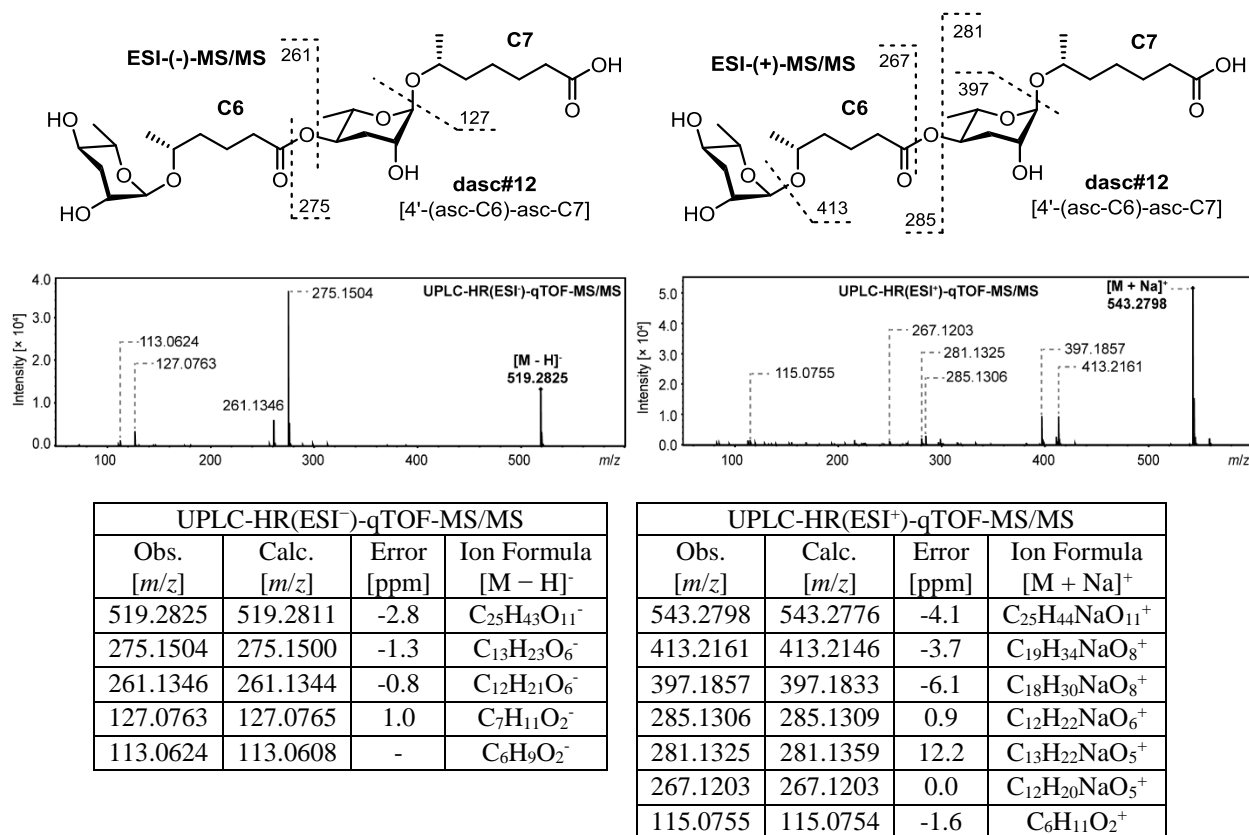

**Figure 10.** UPLC-HR(ESI<sup>±</sup>)-qTOF-MS/MS mass spectral data of dasc#12 [4'-(asc-C6)-asc-C7] in both negative and positive ion modes. Note that dasc#12 [4'-(asc-C6)-asc-C7] is tentatively assigned to be linked at the 4'-position, but its absolute structure has not yet been elucidated.

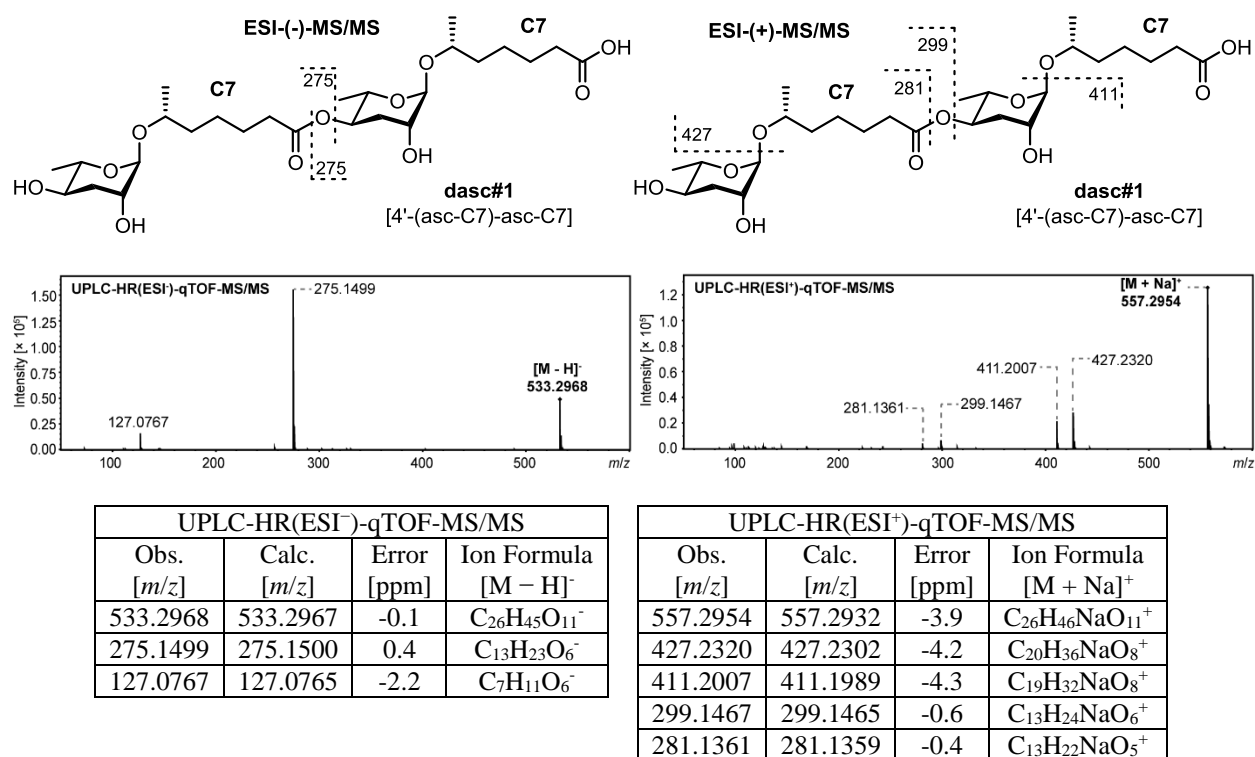

**Figure 11.** UPLC-HR(ESI<sup>-/+</sup>)-qTOF-MS/MS mass spectral data of known dasc#1 [4'-(asc-C7)-asc-C7] (Bose *et al.*, 2012) in both negative and positive ion modes.

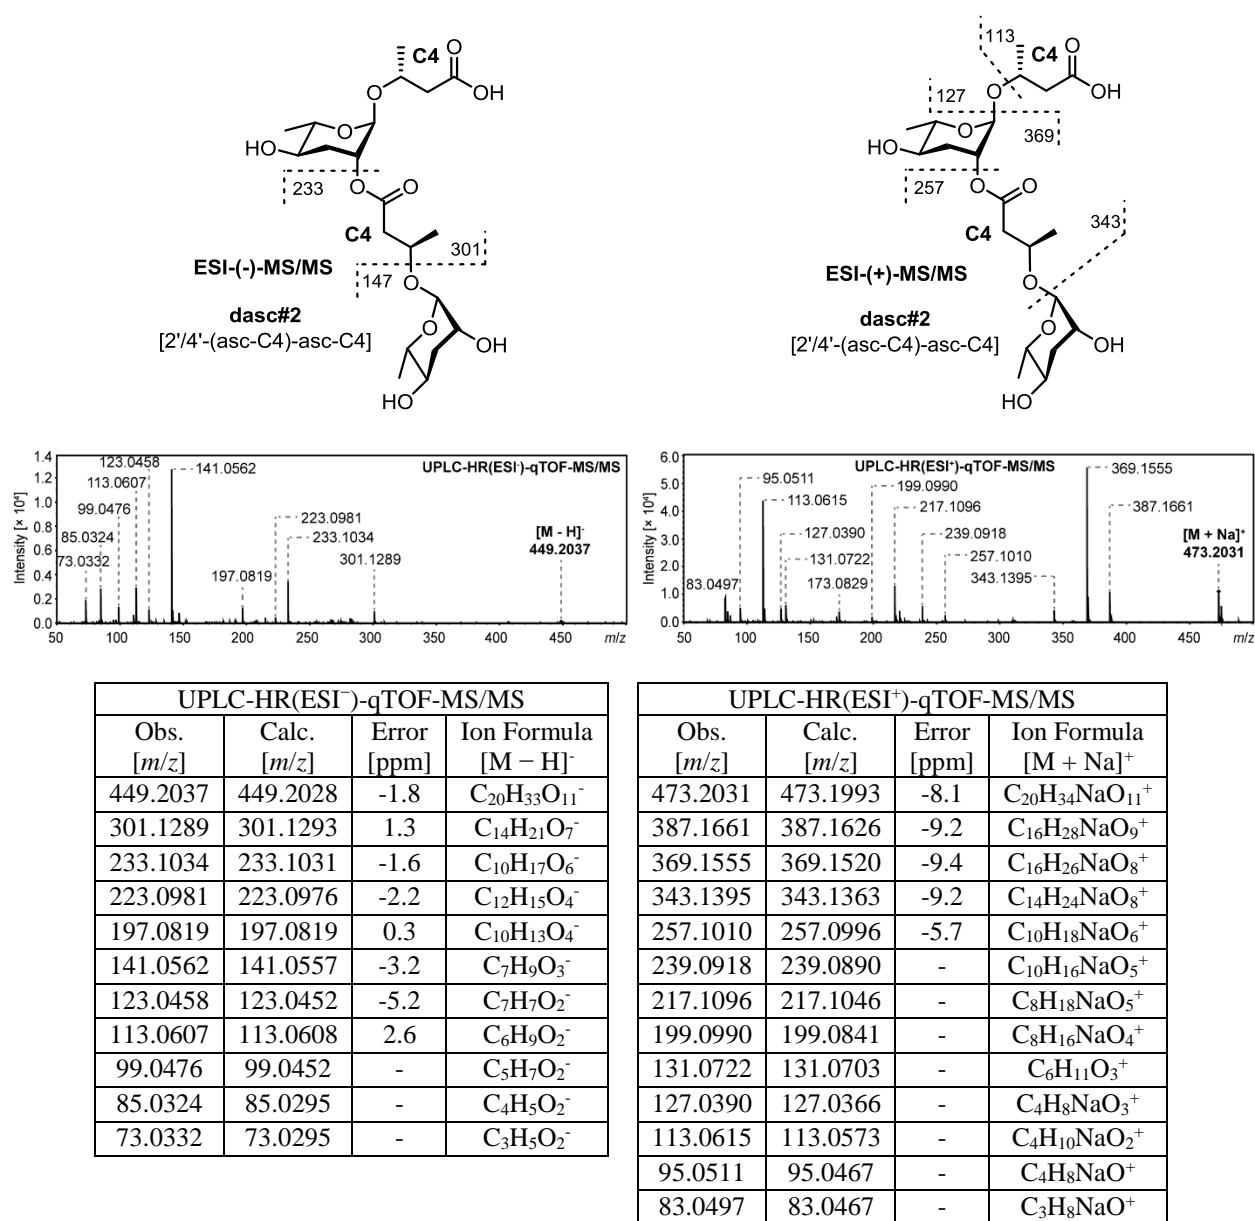

**Figure 12.** UPLC-HR(ESI<sup>±</sup>)-qTOF-MS/MS mass spectral data of dasc#2 [2'/4'-(asc-C4)-asc-C4] in both negative and positive ion modes. Note that dasc#2 [2'/4'-(asc-C4)-asc-C4] is proposed and illustrated to be modified at the 2'-position, but its absolute structure has not yet been elucidated.

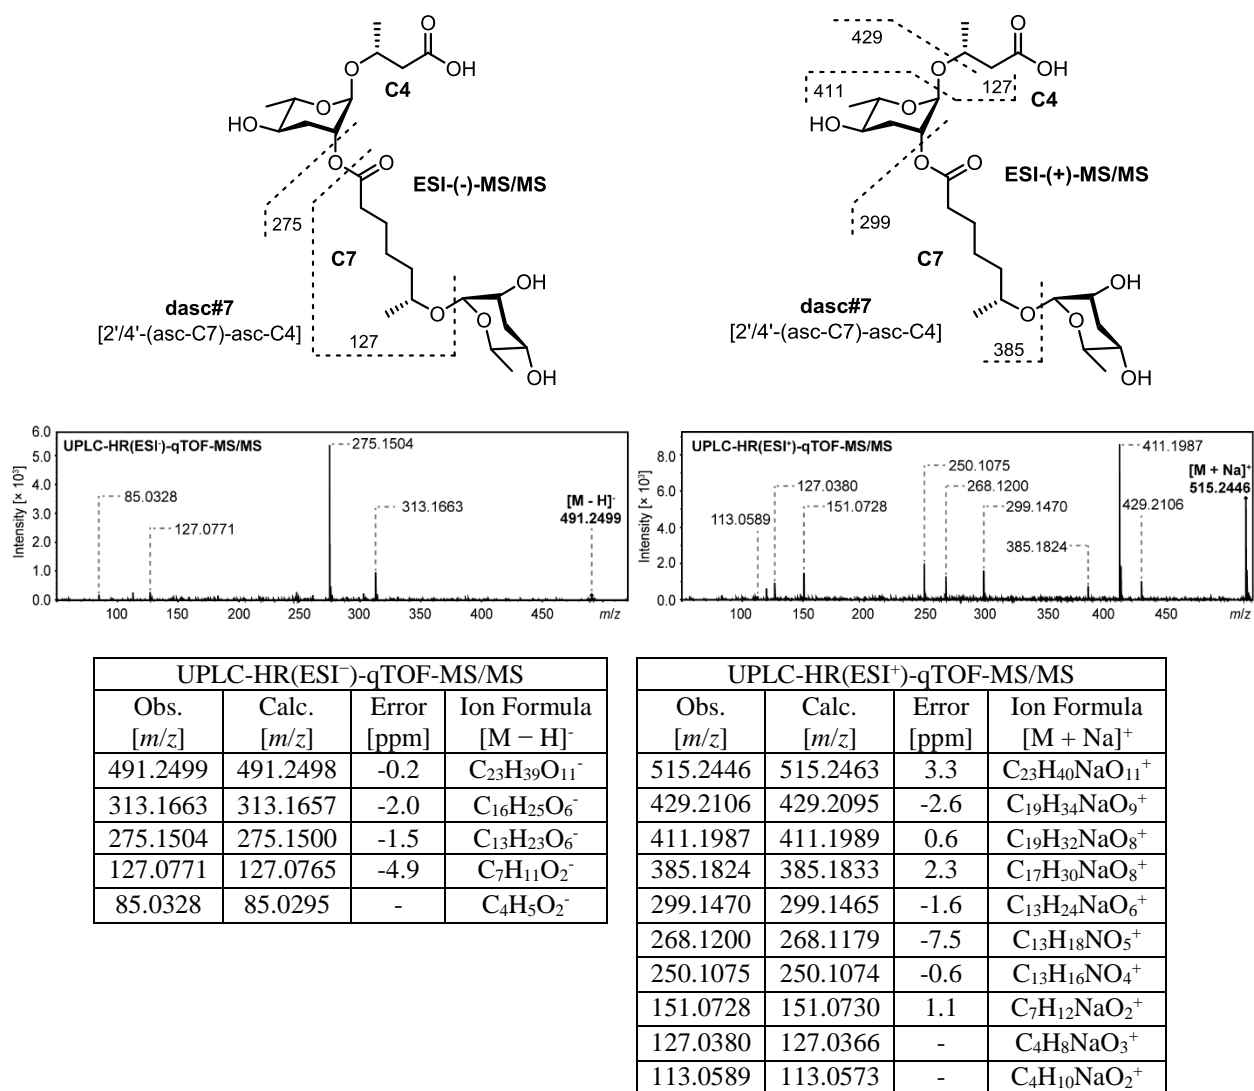

**Figure 13.** UPLC-HR(ESI<sup>±</sup>)-qTOF-MS/MS mass spectral data of dasc#7 [2'/4'-(asc-C7)-asc-C4] in both negative and positive ion modes. Note that dasc#7 [2'/4'-(asc-C7)-asc-C4] is tentatively assigned to be linked at the 2'-position, but its absolute structure has not yet been elucidated.

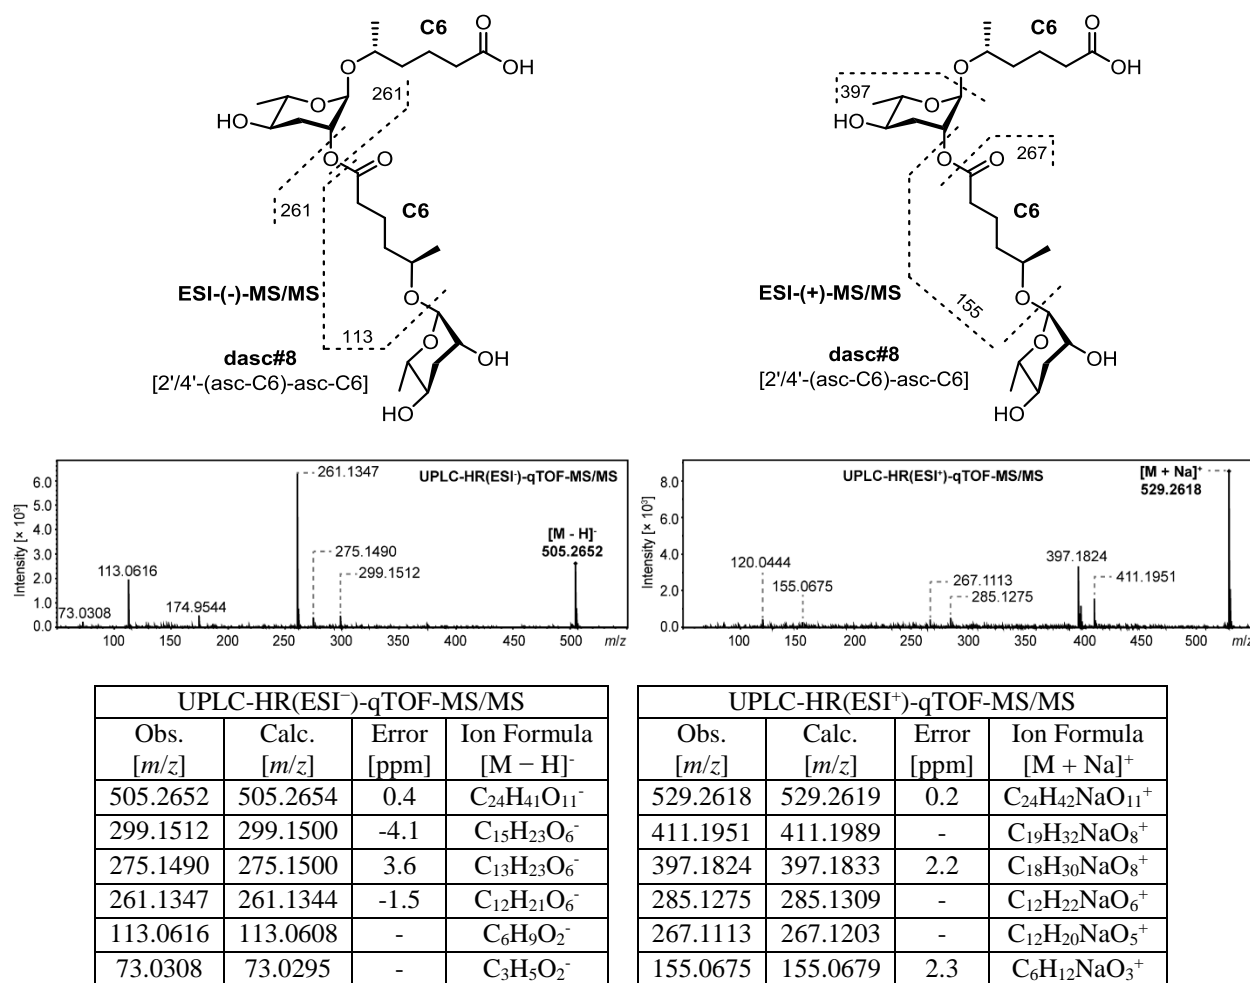

**Figure 14.** UPLC-HR(ESI<sup>+/+</sup>)-qTOF-MS/MS mass spectral data of dasc#8 [2'/4'-(asc-C6)-asc-C6] in both negative and positive ion modes. Note that dasc#8 [2'/4'-(asc-C6)-asc-C6] is tentatively assigned to be linked at the 2'-position, but its absolute structure has not yet been elucidated.

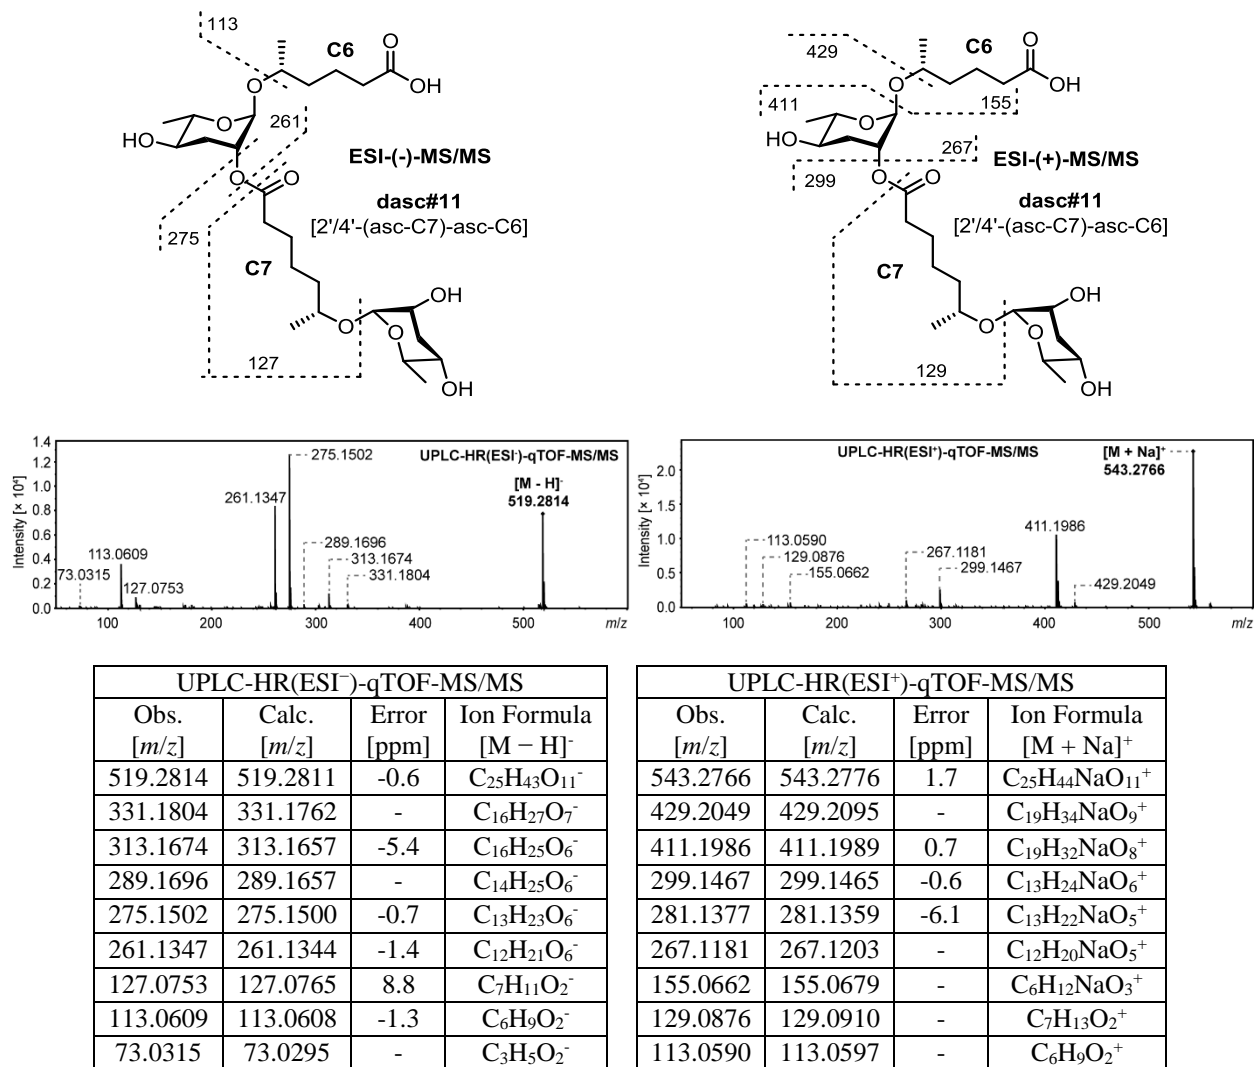

**Figure 15.** UPLC-HR(ESI<sup>±</sup>)-qTOF-MS/MS mass spectral data of dasc#11 [2'/4'-(asc-C7)-asc-C6] in both negative and positive ion modes. Note that dasc#11 [2'/4'-(asc-C7)-asc-C6] is tentatively assigned to be linked at the 2'-position, but its absolute structure has not yet been elucidated.

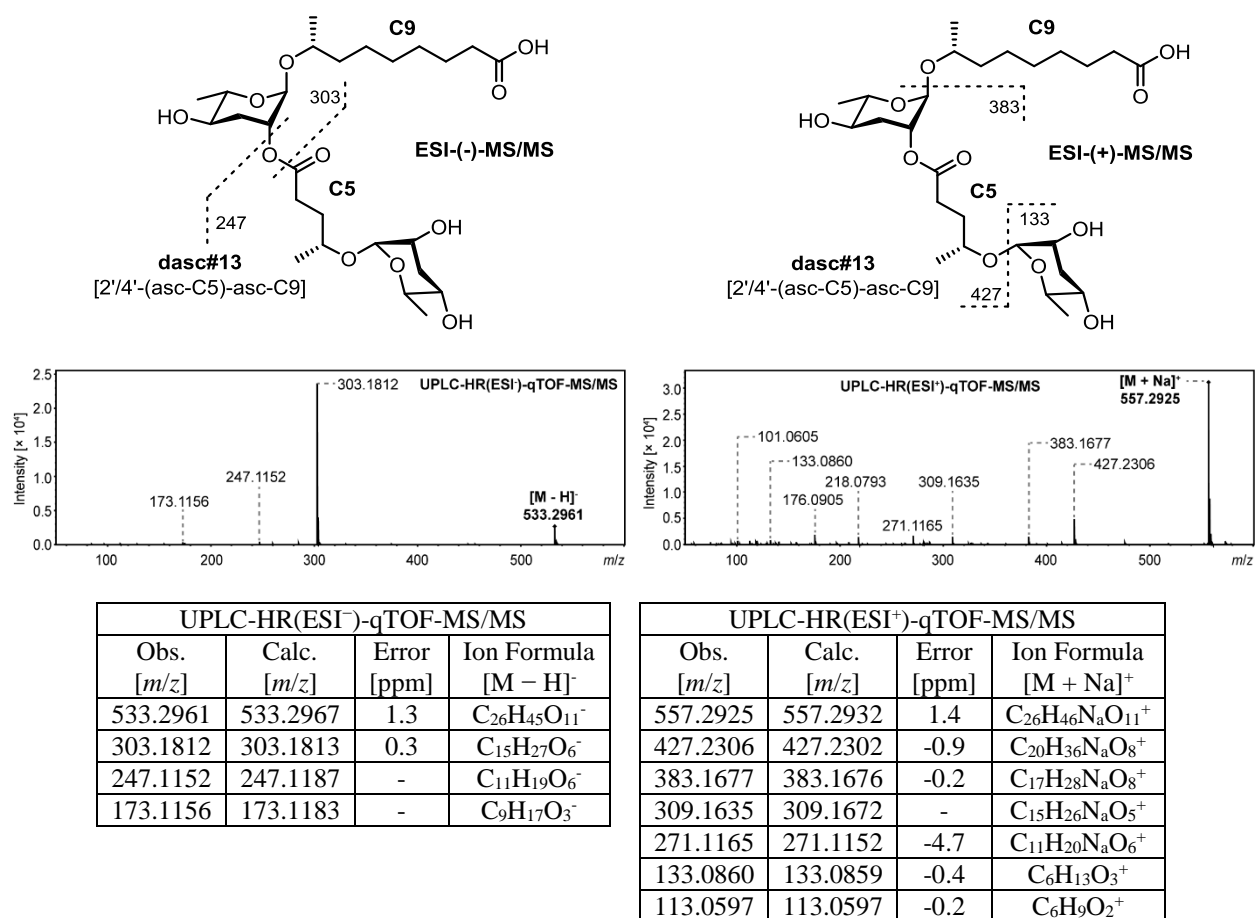

**Figure 16.** UPLC-HR(ESI<sup>+/+</sup>)-qTOF-MS/MS mass spectral data of dasc#13 [2'/4'-(asc-C5)-asc-C9] in both negative and positive ion modes. Note that dasc#13 [2'/4'-(asc-C5)-asc-C9] is tentatively assigned to be linked at the 2'-position, but its absolute structure has not yet been elucidated.

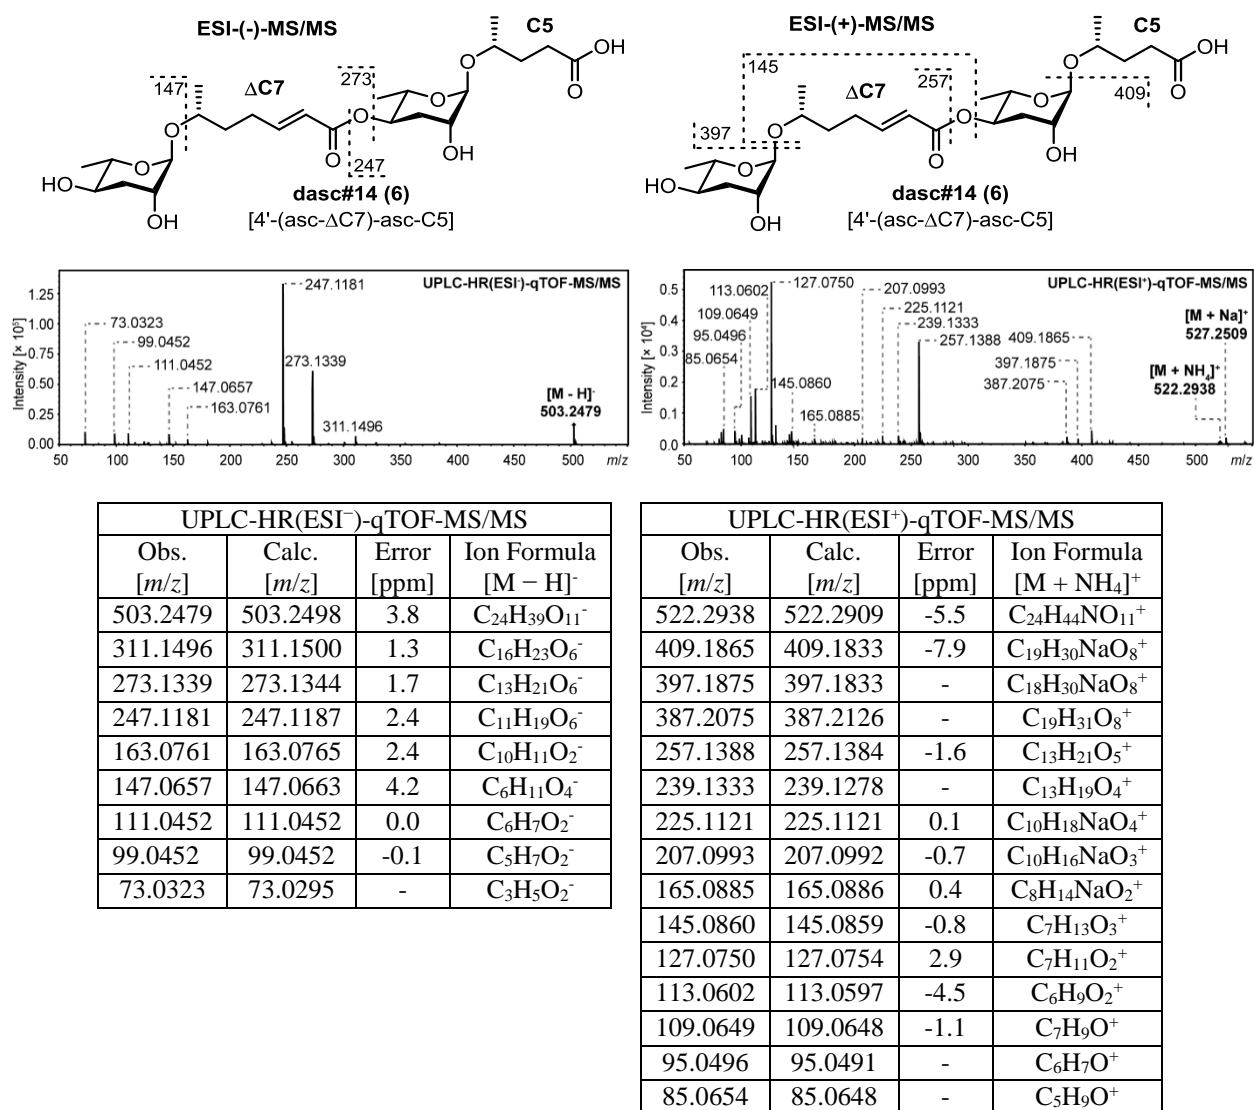

**Figure 17.** UPLC-HR(ESI<sup>+/−</sup>)-qTOF-MS/MS mass spectral data of dasc#14 [4'-(asc-ΔC7)-asc-C5, **6**] in both negative and positive ion modes.

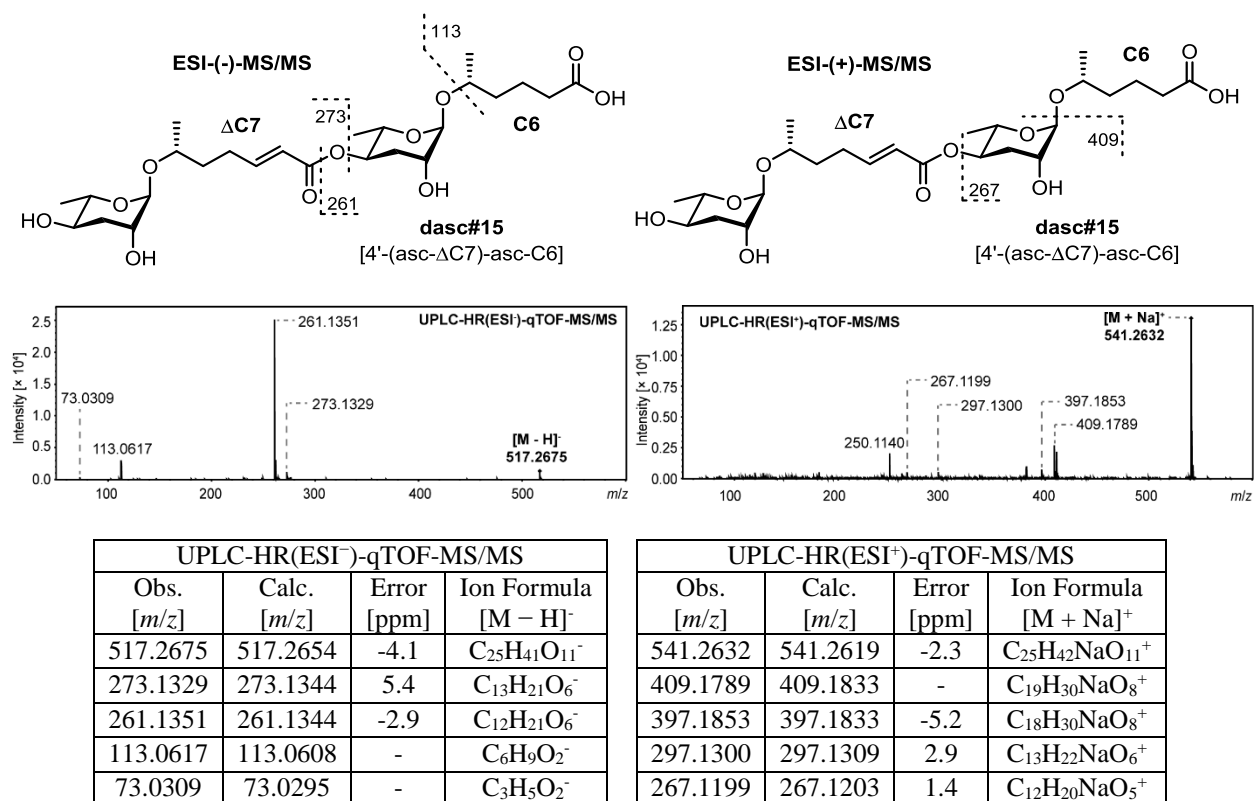

**Figure 18.** UPLC-HR(ESI<sup>+/+</sup>)-qTOF-MS/MS mass spectral data of dasc#15 [4'-(asc-ΔC7)-asc-C6] in both negative and positive ion modes. Note that dasc#15 [4'-(asc-ΔC7)-asc-C6] is proposed to be linked at the 4'-position, but its absolute structure has not yet been elucidated.

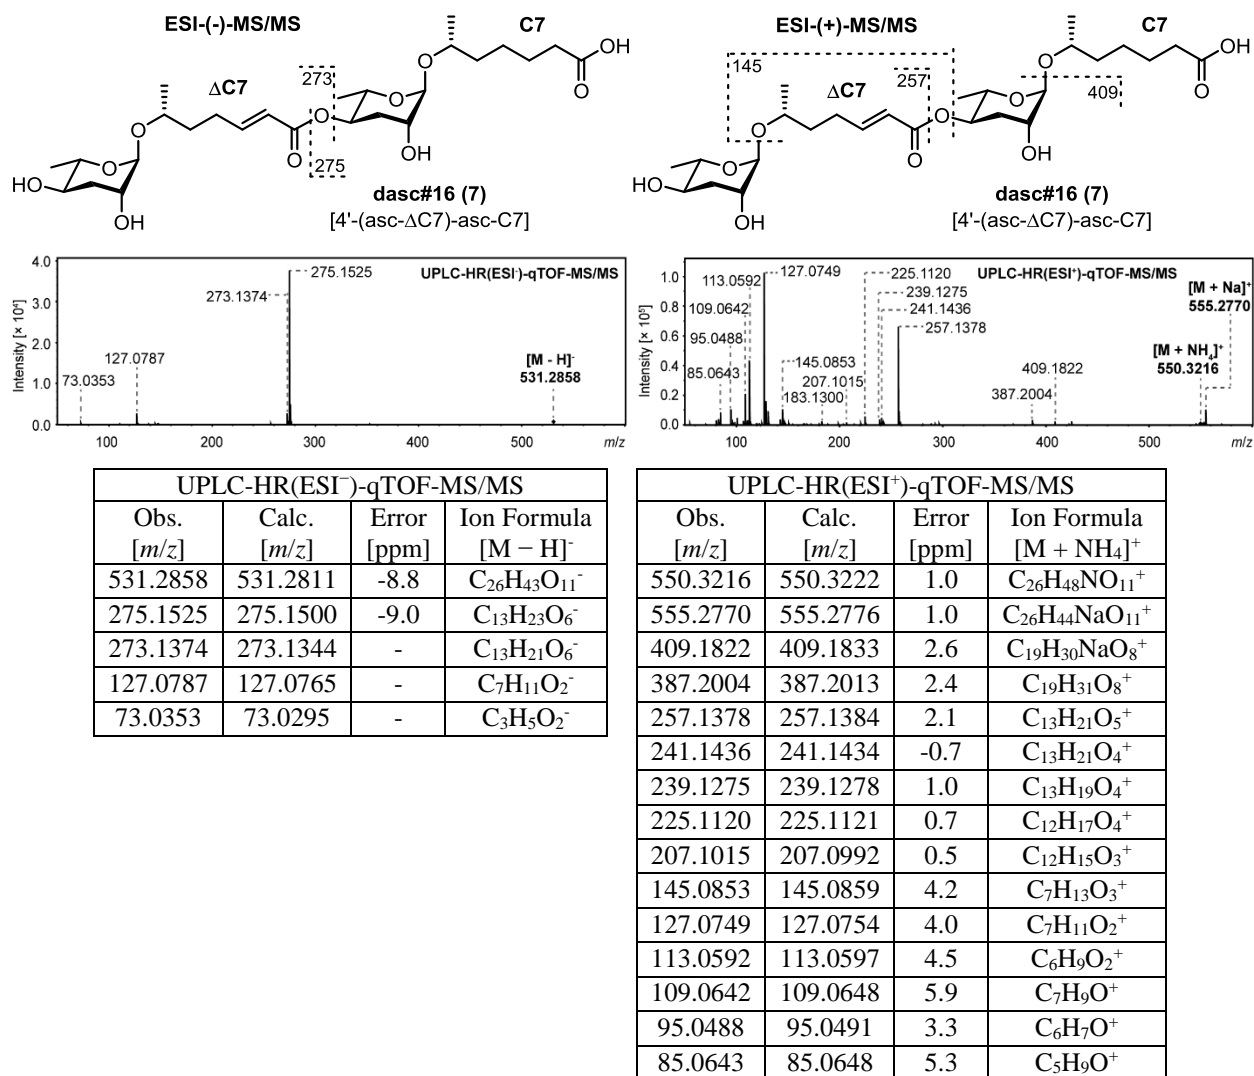

**Figure 19.** UPLC-HR(ESI<sup>+/+</sup>)-qTOF-MS/MS mass spectral data of dasc#16 [4'-(asc-ΔC7)-asc-C7, 7] in both negative and positive ion modes.

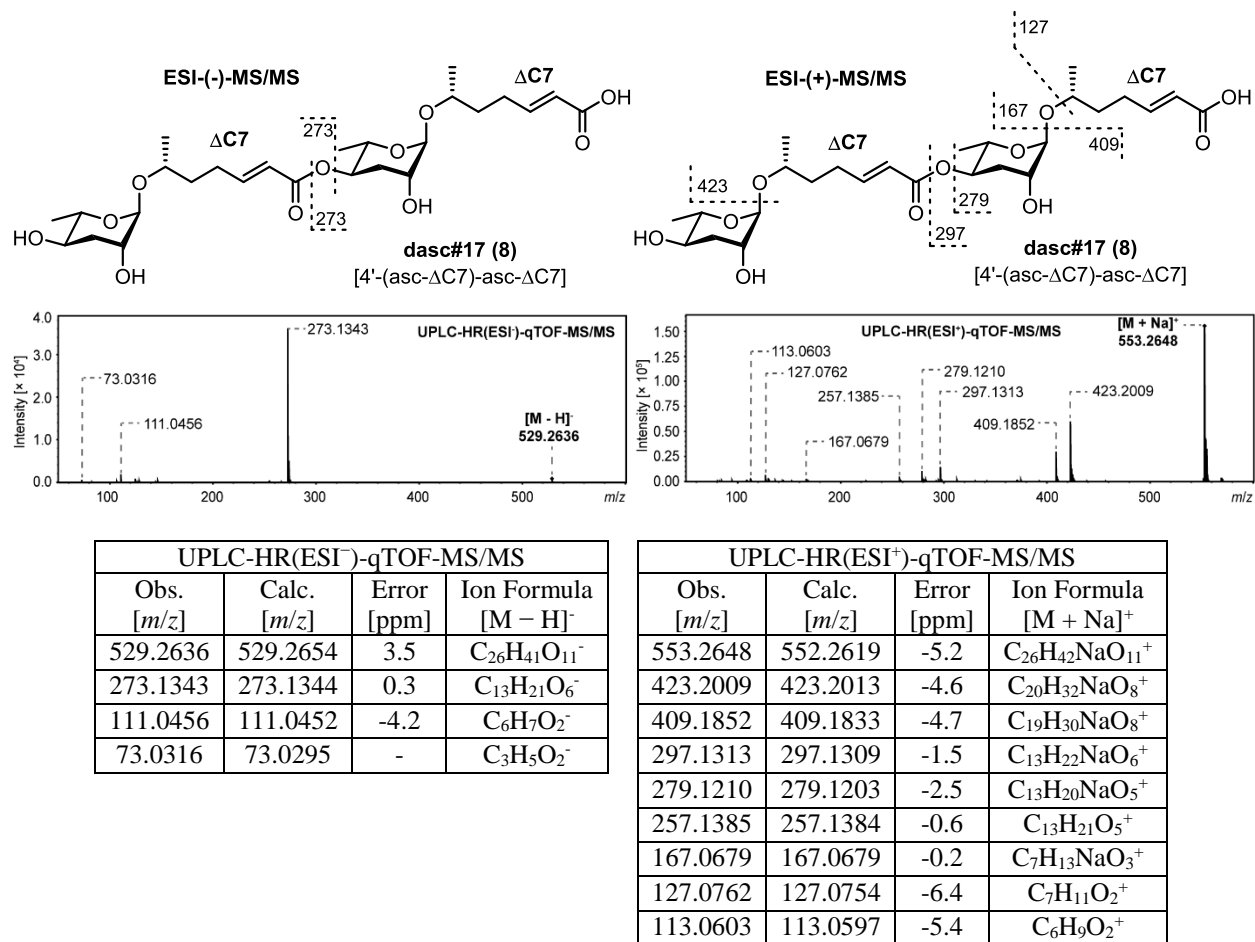

**Figure 20.** UPLC-HR(ESI<sup>-/+</sup>)-qTOF-MS/MS mass spectral data of dasc#17 [4'-(asc- $\Delta$ C7)-asc- $\Delta$ C7, **8**] in both negative and positive ion modes.

**supplementary file 2b: MS/MS spectral data of paso#9**  
**Figure 1.** LC-HR( $\text{ESI}^{-/+}$ )-MS/MS spectral data of paso#9.

Pages  
S24

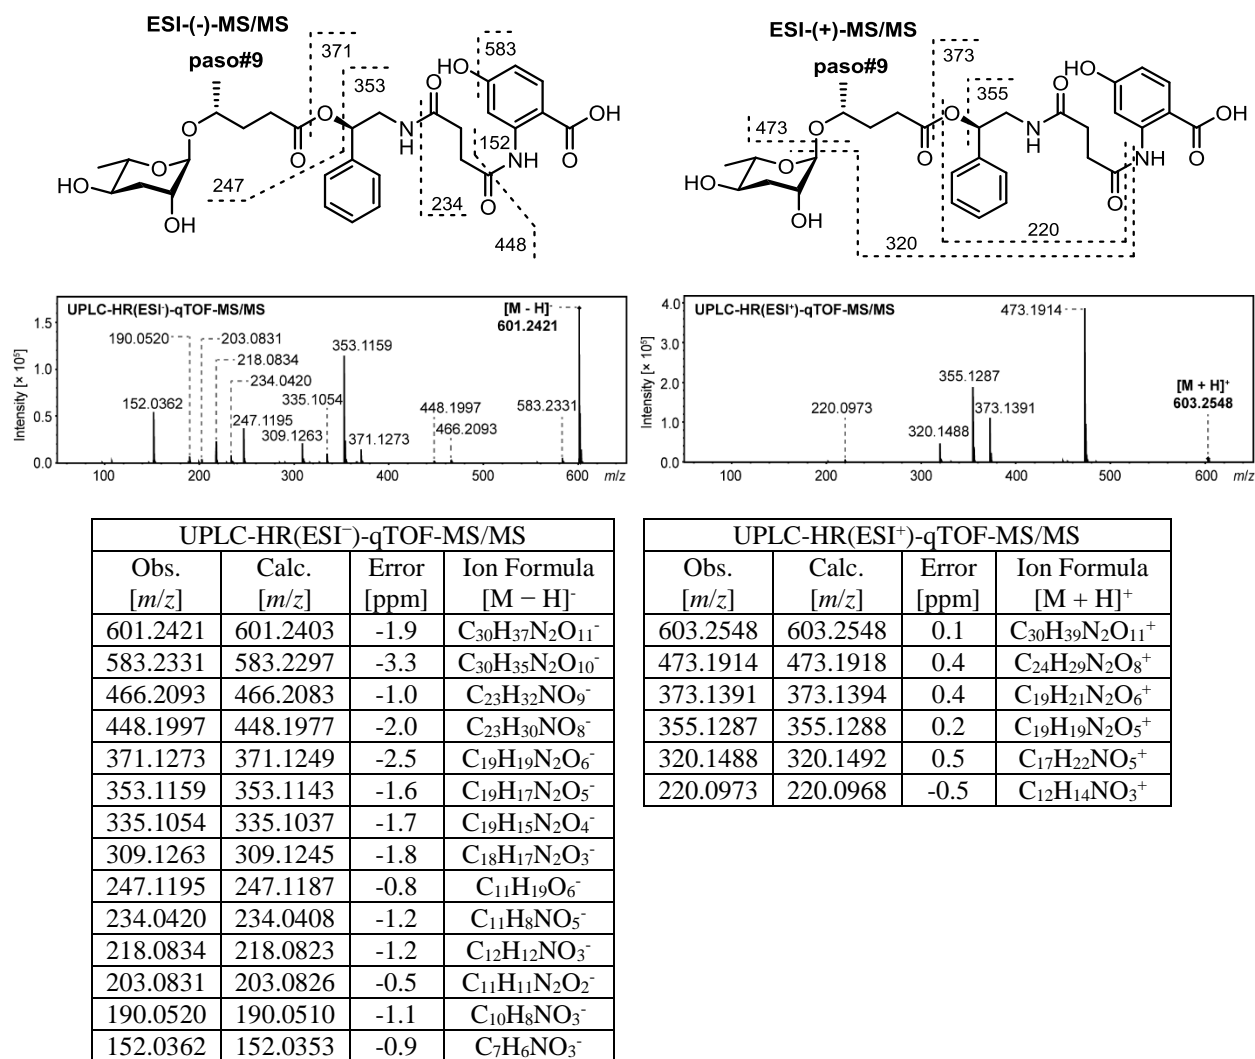

**Figure 1.** UPLC-HR(ESI<sup>+/+</sup>)-qTOF-MS/MS mass spectral data of paso#9 in both negative and positive ion modes. Analysis of NMR data of paso#9 suggests a 4-hydroxyanthranilic acid moiety in paso#9 (*supplementary file 1c – Figures 5-13 and supplementary file 3 – Table 14*).

| <b>supplementary file 2c: MS/MS spectral data of UBAS chemicals</b>                                                   | <b>Pages</b> |
|-----------------------------------------------------------------------------------------------------------------------|--------------|
| <b>Figure 1.</b> LC-HR( $\text{ESI}^{-/+}$ )-MS/MS spectral data of ubas#5 [4'-UB-asc-C4] from <i>P. pacificus</i> .  | S26          |
| <b>Figure 2.</b> LC-HR( $\text{ESI}^{-/+}$ )-MS/MS spectral data of ubas#3 [4'-UB-asc-C5] from <i>P. pacificus</i> .  | S27          |
| <b>Figure 3.</b> LC-HR( $\text{ESI}^{-/+}$ )-MS/MS spectral data of ubas#12 [4'-UB-asc-C6] from <i>P. pacificus</i> . | S28          |
| <b>Figure 4.</b> LC-HR( $\text{ESI}^{-/+}$ )-MS/MS spectral data of ubas#4 [4'-UB-asc-C7] from <i>P. pacificus</i> .  | S29          |
| <b>Figure 5.</b> LC-HR( $\text{ESI}^{-/+}$ )-MS/MS spectral data of ubas#1 from <i>P. pacificus</i> .                 | S30          |
| <b>Figure 6.</b> LC-HR( $\text{ESI}^{-/+}$ )-MS/MS spectral data of ubas#2 from <i>P. pacificus</i> .                 | S31          |
| <b>Figure 7.</b> LC-HR( $\text{ESI}^{-/+}$ )-MS/MS spectral data of ubas#26 [4'-UB-asc- $\omega$ C3].                 | S32          |
| <b>Figure 8.</b> LC-HR( $\text{ESI}^{-/+}$ )-MS/MS spectral data of ubas#33 [4'-UB-2'-(asc- $\omega$ C3)-asc-C4].     | S33          |
| <b>Figure 9.</b> LC-HR( $\text{ESI}^{-/+}$ )-MS/MS spectral data of ubas#34 [4'-UB-2'-(asc-C4)-asc-C4, <b>11</b> ].   | S34          |
| <b>Figure 10.</b> LC-HR( $\text{ESI}^{-/+}$ )-MS/MS spectral data of ubas#35 [4'-UB-2'-(asc-C4)-asc-C5, <b>12</b> ].  | S35          |
| <b>Figure 11.</b> LC-HR( $\text{ESI}^{-/+}$ )-MS/MS spectral data of ubas#36 [4'-UB-2'-(asc-C4)-asc-C6].              | S36          |
| <b>Figure 12.</b> LC-HR( $\text{ESI}^{-/+}$ )-MS/MS spectral data of ubas#37 [4'-UB-2'-(asc-C4)-asc-C7].              | S37          |
| <b>Figure 13.</b> LC-HR( $\text{ESI}^{-/+}$ )-MS/MS spectral data of ubas#27 [4'-UB-2'-(asc-C5)-asc- $\omega$ C3].    | S38          |
| <b>Figure 14.</b> LC-HR( $\text{ESI}^{-/+}$ )-MS/MS spectral data of ubas#28 [4'-UB-2'-(asc-C5)-asc-C4, <b>13</b> ].  | S39          |
| <b>Figure 15.</b> LC-HR( $\text{ESI}^{-/+}$ )-MS/MS spectral data of ubas#1 from <i>P. taiwanensis</i> .              | S40          |
| <b>Figure 16.</b> LC-HR( $\text{ESI}^{-/+}$ )-MS/MS spectral data of ubas#1 from <i>P. laevicollis</i> .              | S41          |
| <b>Figure 17.</b> LC-HR( $\text{ESI}^{-/+}$ )-MS/MS spectral data of ubas#30 ( <b>9</b> ) from <i>P. maxplancki</i> . | S42          |
| <b>Figure 18.</b> LC-HR( $\text{ESI}^{-/+}$ )-MS/MS spectral data of ubas#30 ( <b>9</b> ) from <i>P. fukushimae</i> . | S43          |
| <b>Figure 19.</b> LC-HR( $\text{ESI}^{-/+}$ )-MS/MS spectral data of ubas#29 [4'-UB-2'-(asc-C6)-asc-C4].              | S44          |
| <b>Figure 20.</b> LC-HR( $\text{ESI}^{-/+}$ )-MS/MS spectral data of ubas#31 [4'-UB-2'-(asc-C6)-asc-C6].              | S45          |
| <b>Figure 21.</b> LC-HR( $\text{ESI}^{-/+}$ )-MS/MS spectral data of ubas#32 [4'-UB-2'-(asc-C5)-asc-C7, <b>10</b> ].  | S46          |

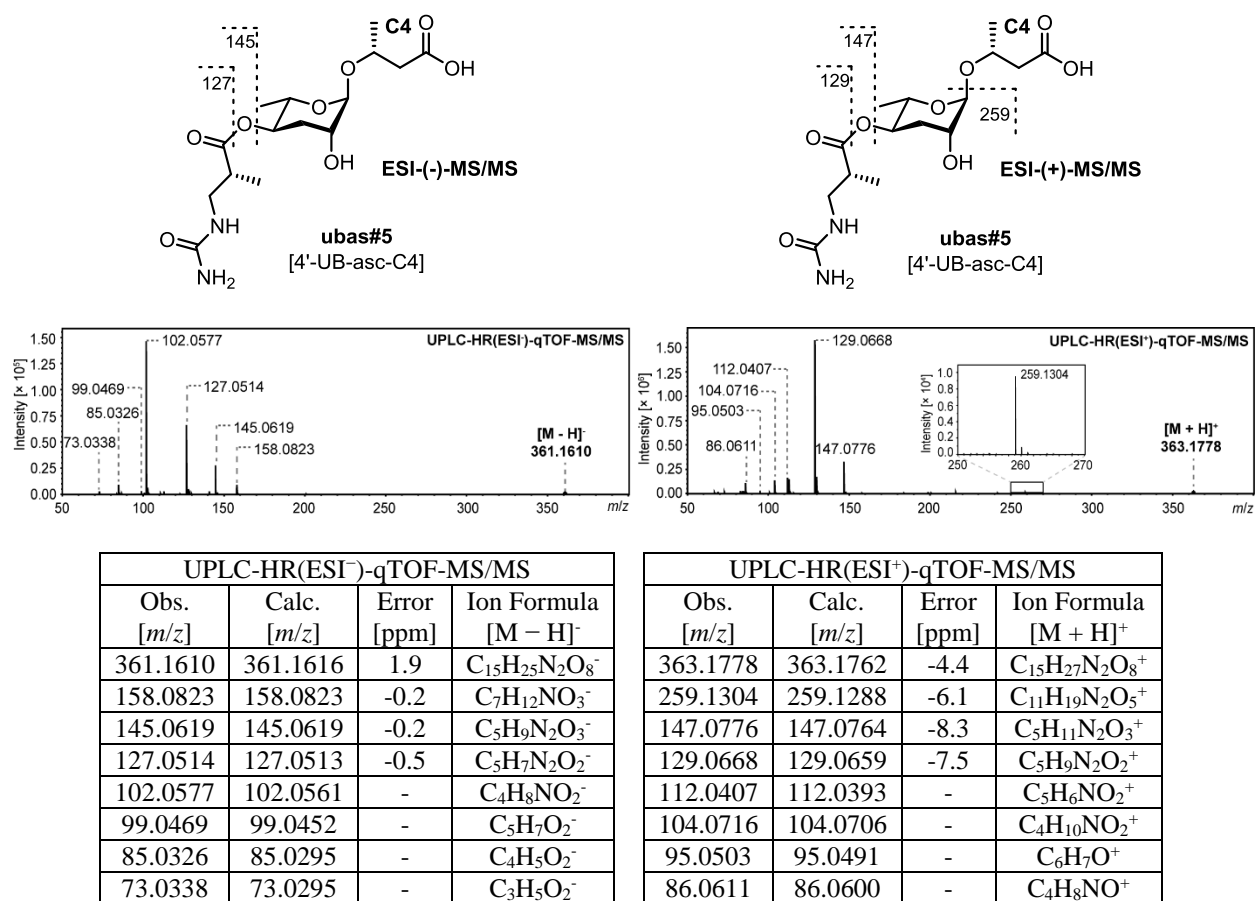

**Figure 1.** UPLC-HR(ESI<sup>±</sup>)-qTOF-MS/MS mass spectral data of known ubas#5 [4'-UB-asc-C4] (*Falcke et al., 2018*) from *P. pacificus* in both negative and positive ion modes. Characteristic ion signal for *m/z* 259.1304 containing an ureidoisobutyric acid moiety and an ascarylose unit was used for targeted MS/MS screening. *P. triformis* also produced large amounts of ubas#5 [4'-UB-asc-C4] (*supplementary file 1d – Figures 30-35*).

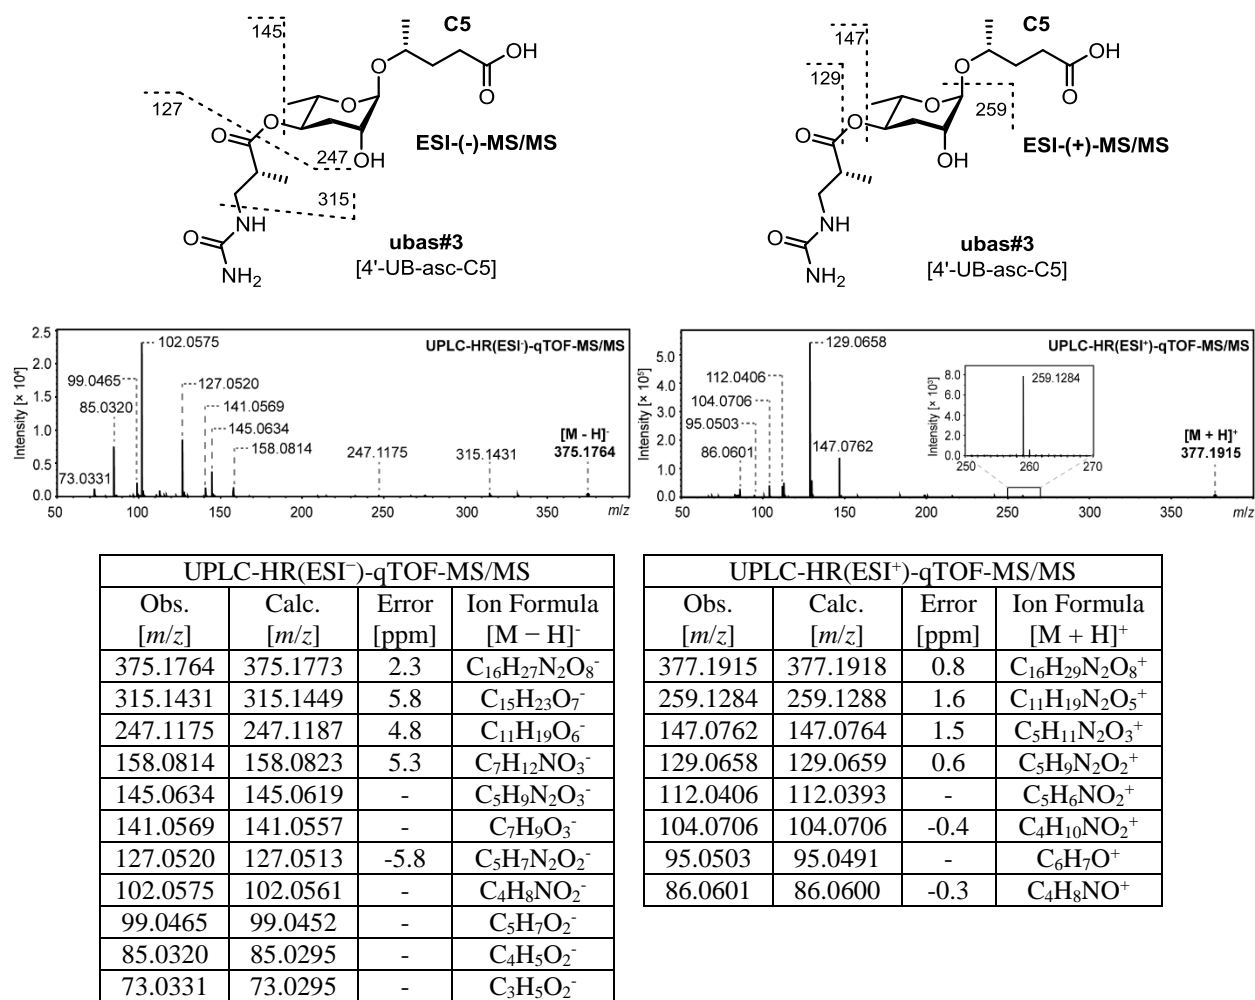

**Figure 2.** UPLC-HR(ESI<sup>±</sup>)-qTOF-MS/MS mass spectral data of known ubas#3 [4'-UB-asc-C5] (Falcke *et al.*, 2018) from *P. pacificus* in both negative and positive ion modes. Characteristic ion signal for *m/z* 259.1304 containing an ureidoisobutyric acid moiety and an ascarylose unit was used for targeted MS/MS screening.

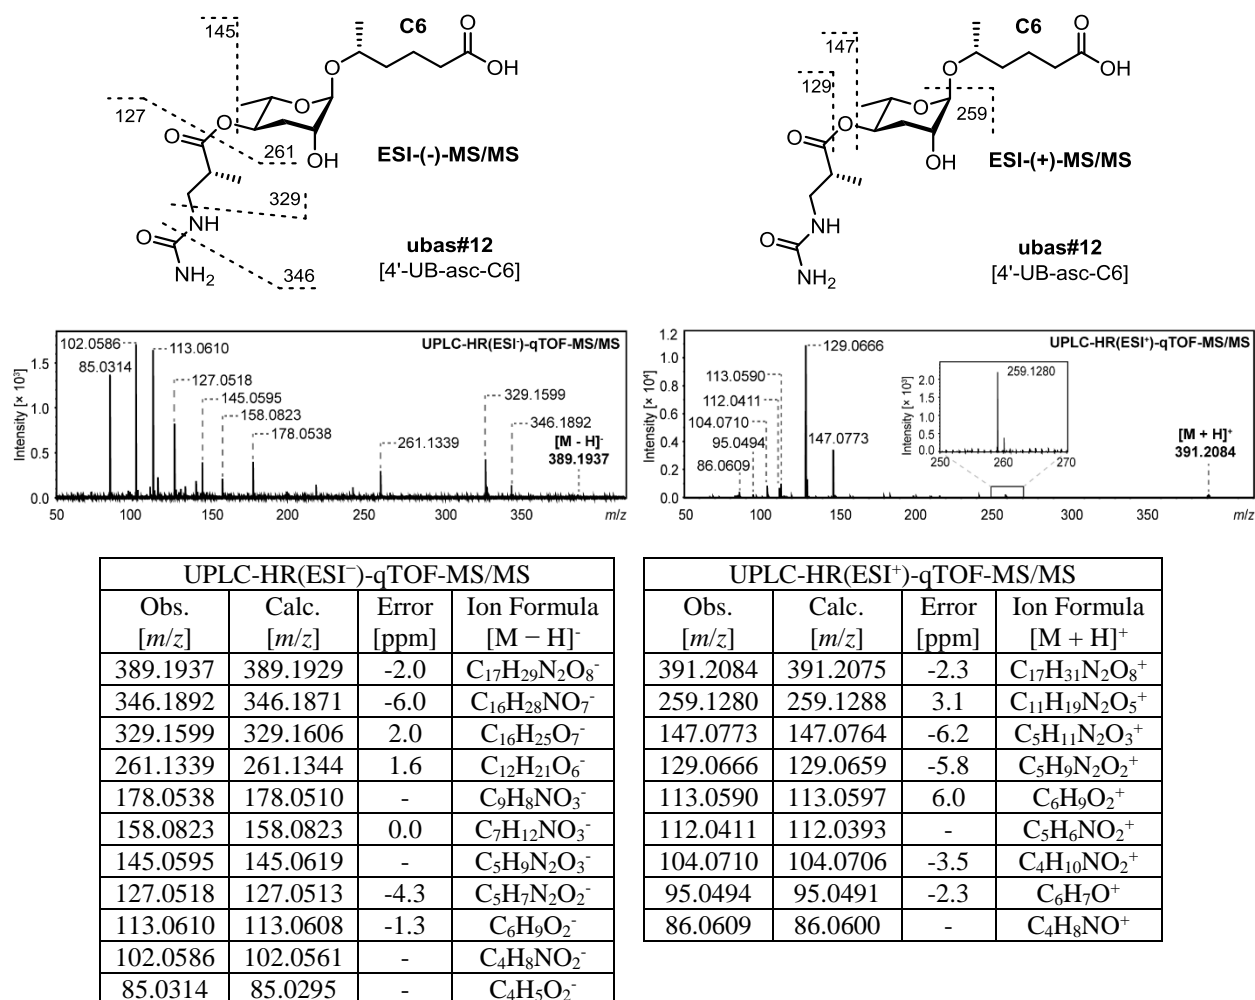

**Figure 3.** UPLC-HR(ESI<sup>+/+</sup>)-qTOF-MS/MS mass spectral data of known ubas#12 [4'-UB-asc-C6] (*Falcke et al., 2018*) from *P. pacificus* in both negative and positive ion modes. Characteristic ion signal for *m/z* 259.1304 containing an ureidoisobutyric acid moiety and an ascaryle unit was used for targeted MS/MS screening.

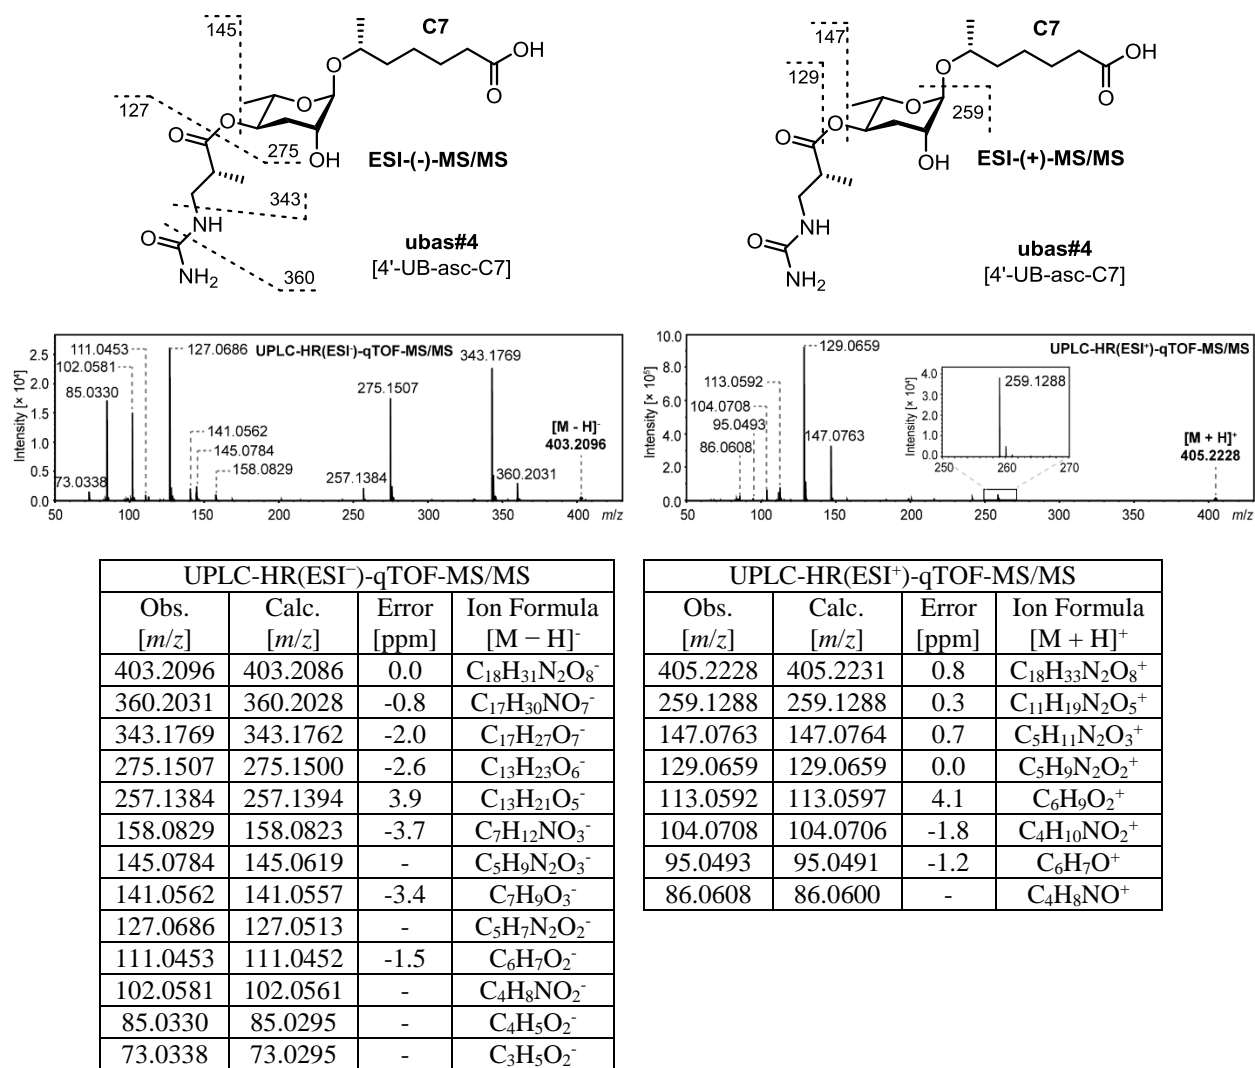

**Figure 4.** UPLC-HR(ESI<sup>-/+</sup>)-qTOF-MS/MS mass spectral data of known ubas#4 [4'-UB-asc-C7] (Falcke *et al.*, 2018) from *P. pacificus* in both negative and positive ion modes. Characteristic ion signal for *m/z* 259.1304 containing an ureidoisobutyric acid moiety and an ascarylose unit was used for targeted MS/MS screening.

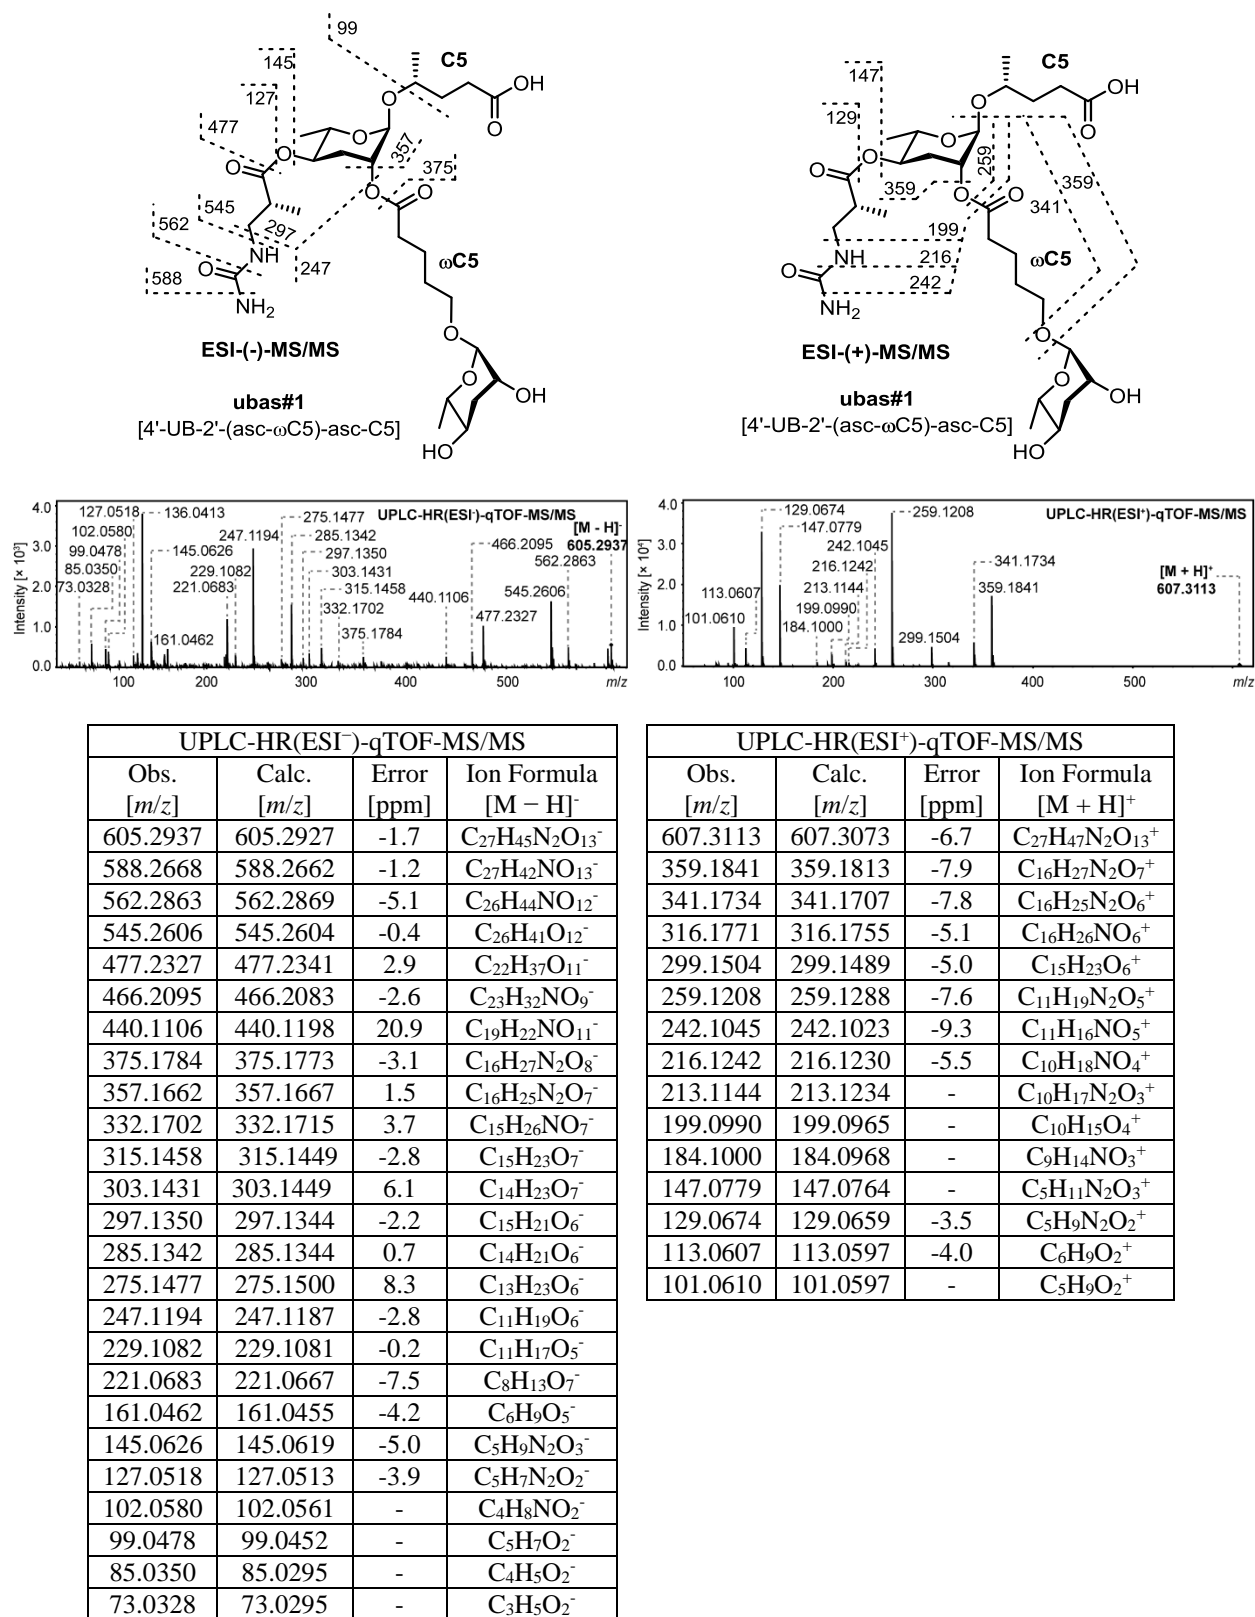

**Figure 5.** UPLC-HR(ESI<sup>±</sup>)-qTOF-MS/MS mass spectral data of known ubas#1 [4'-UB-2'-(asc-ωC5)-asc-C5] (supplementary file 1d – Figures 9-10) (Bose et al., 2012) from *P. pacificus*.

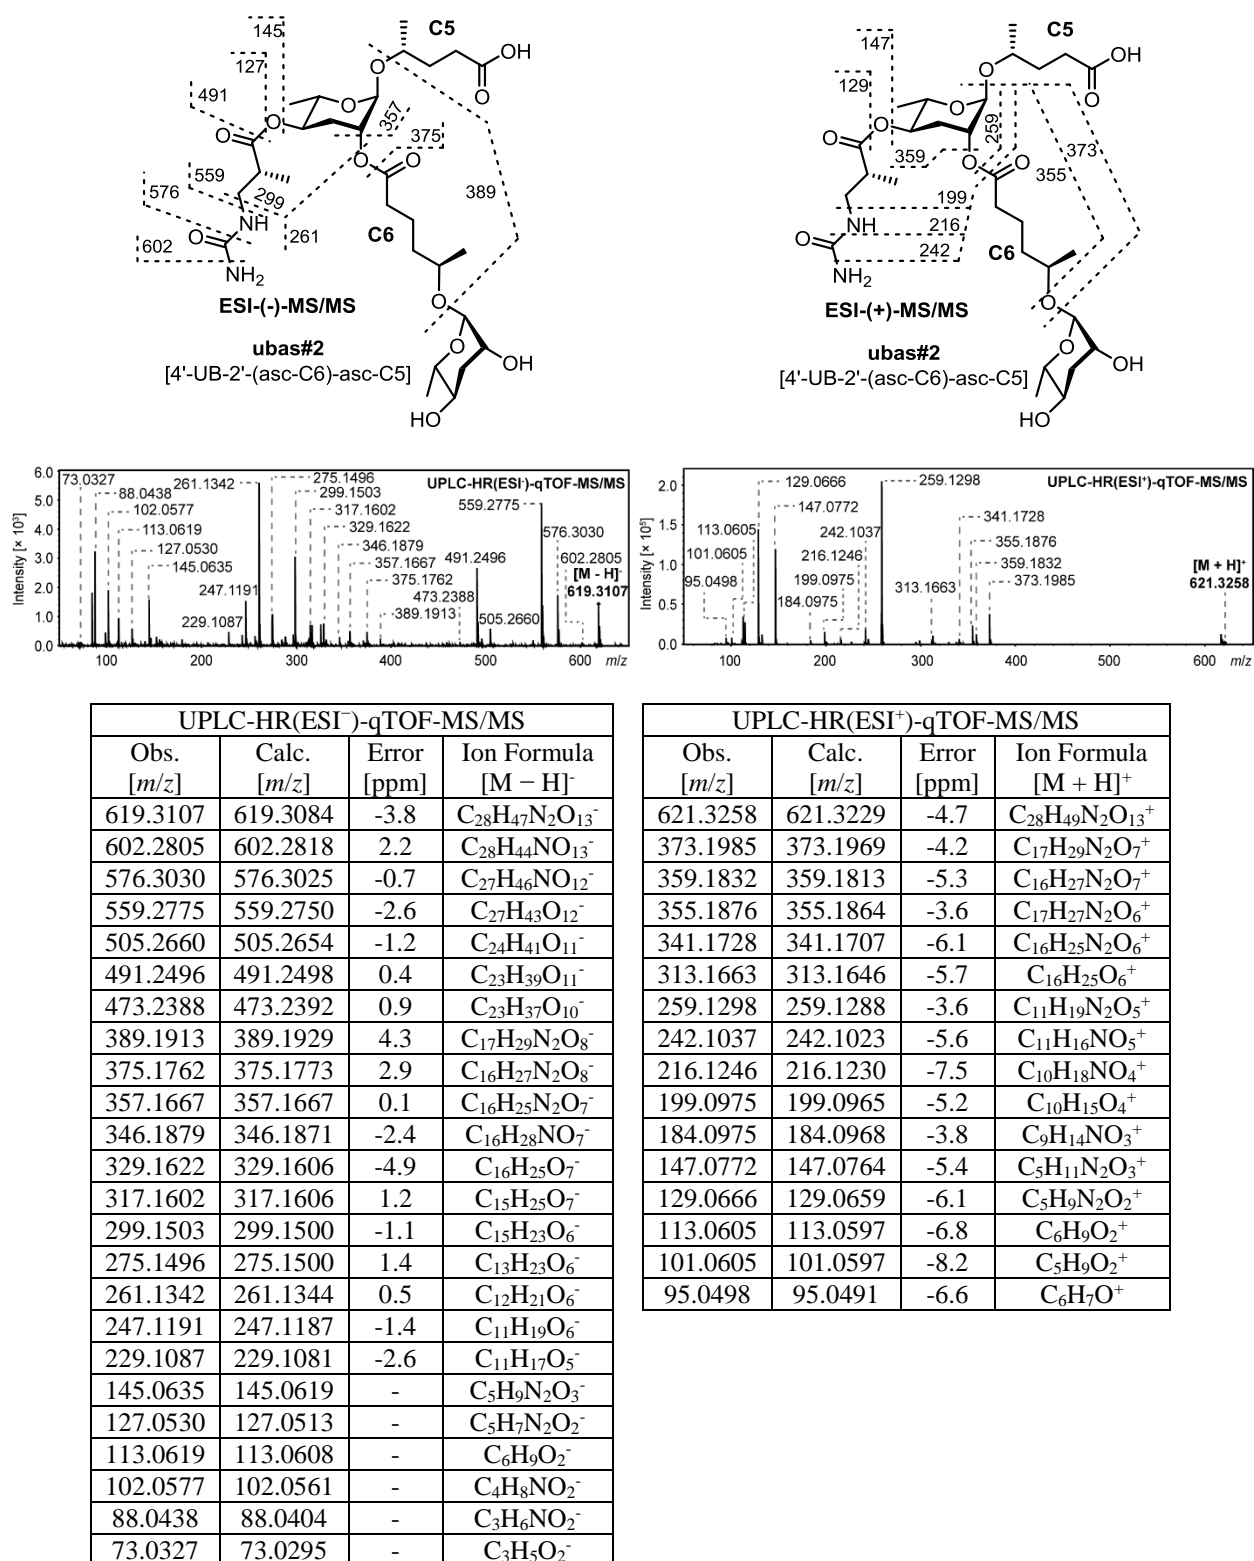

**Figure 6.** UPLC-HR(ESI<sup>±</sup>)-qTOF-MS/MS mass spectral data of known ubas#2 [4'-UB-2'-(asc-C6)-asc-C5] (*Bose et al., 2012*) from *P. pacificus* in both negative and positive ion modes.

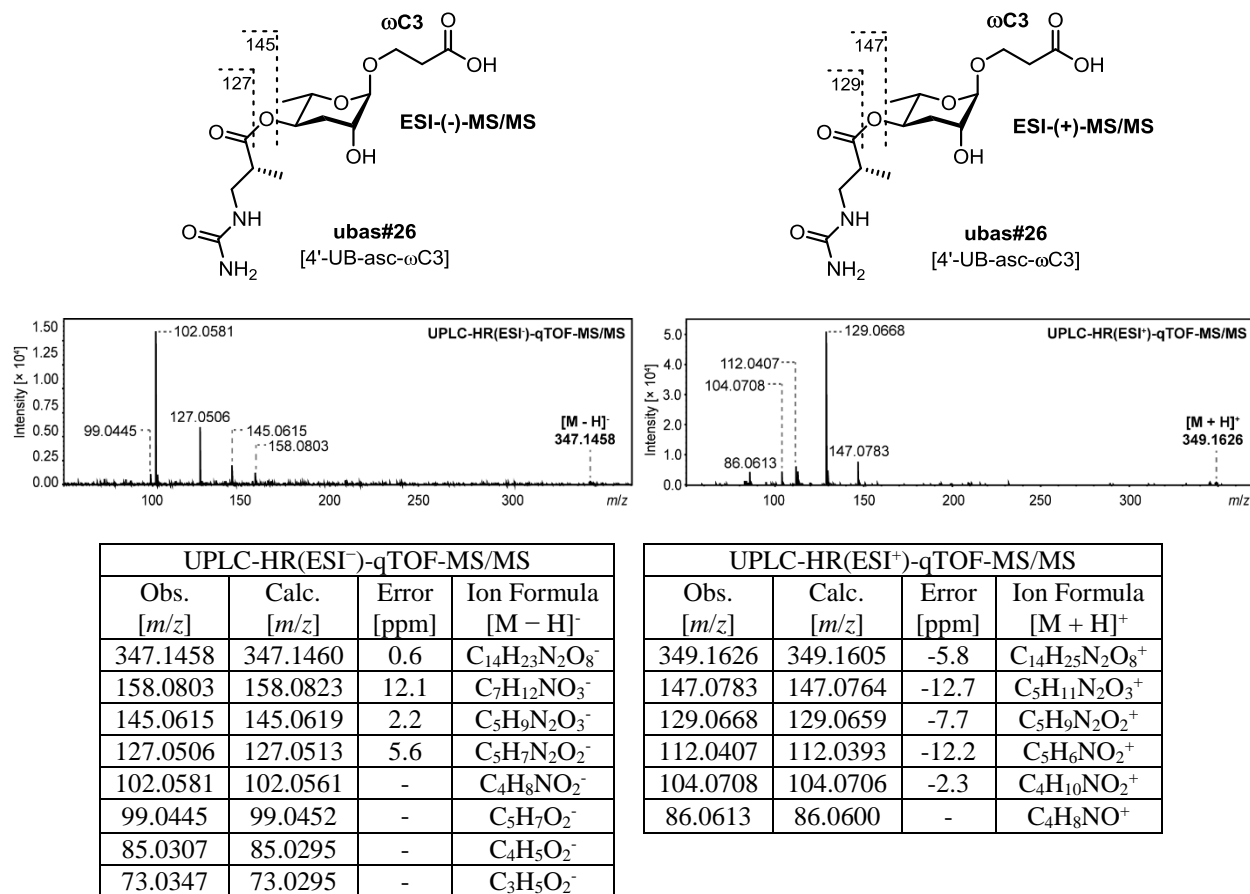

**Figure 7.** UPLC-HR(ESI<sup>-/+</sup>)-qTOF-MS/MS mass spectral data of newly identified ubas#26 [4'-UB-asc- $\omega$ C3] in both negative and positive ion modes.

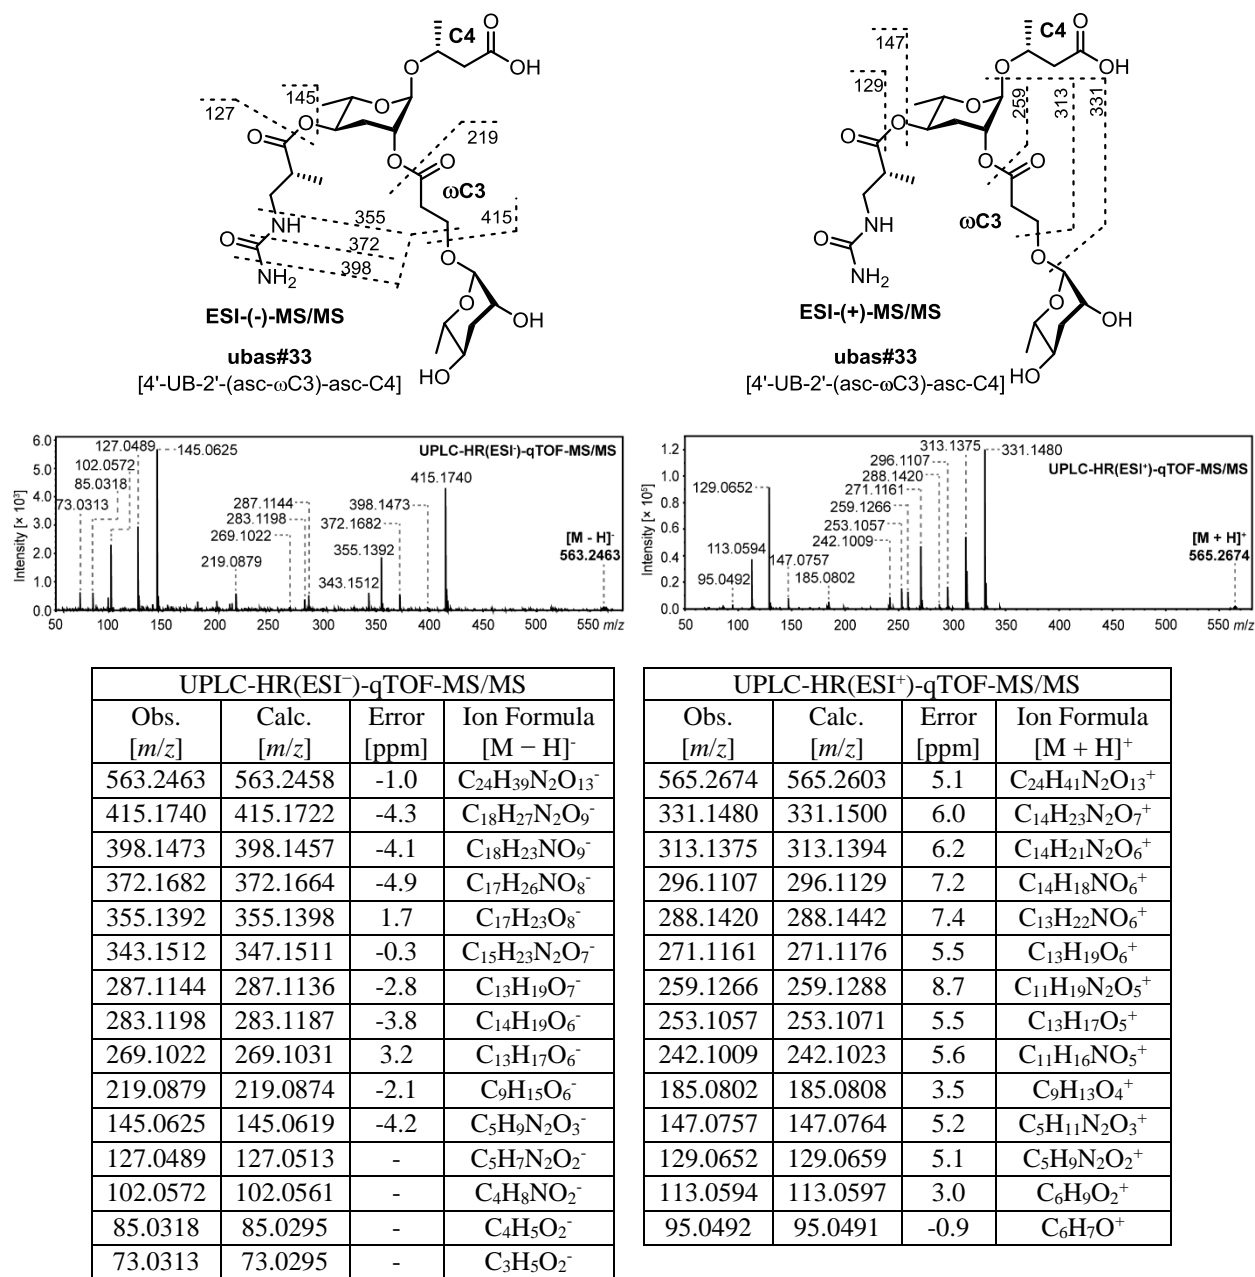

**Figure 8.** UPLC-HR(ESI<sup>+/+</sup>)-qTOF-MS/MS mass spectral data of ubas#33 [4'-UB-2'-(asc-ωC3)-asc-C4] in both negative and positive ion modes.

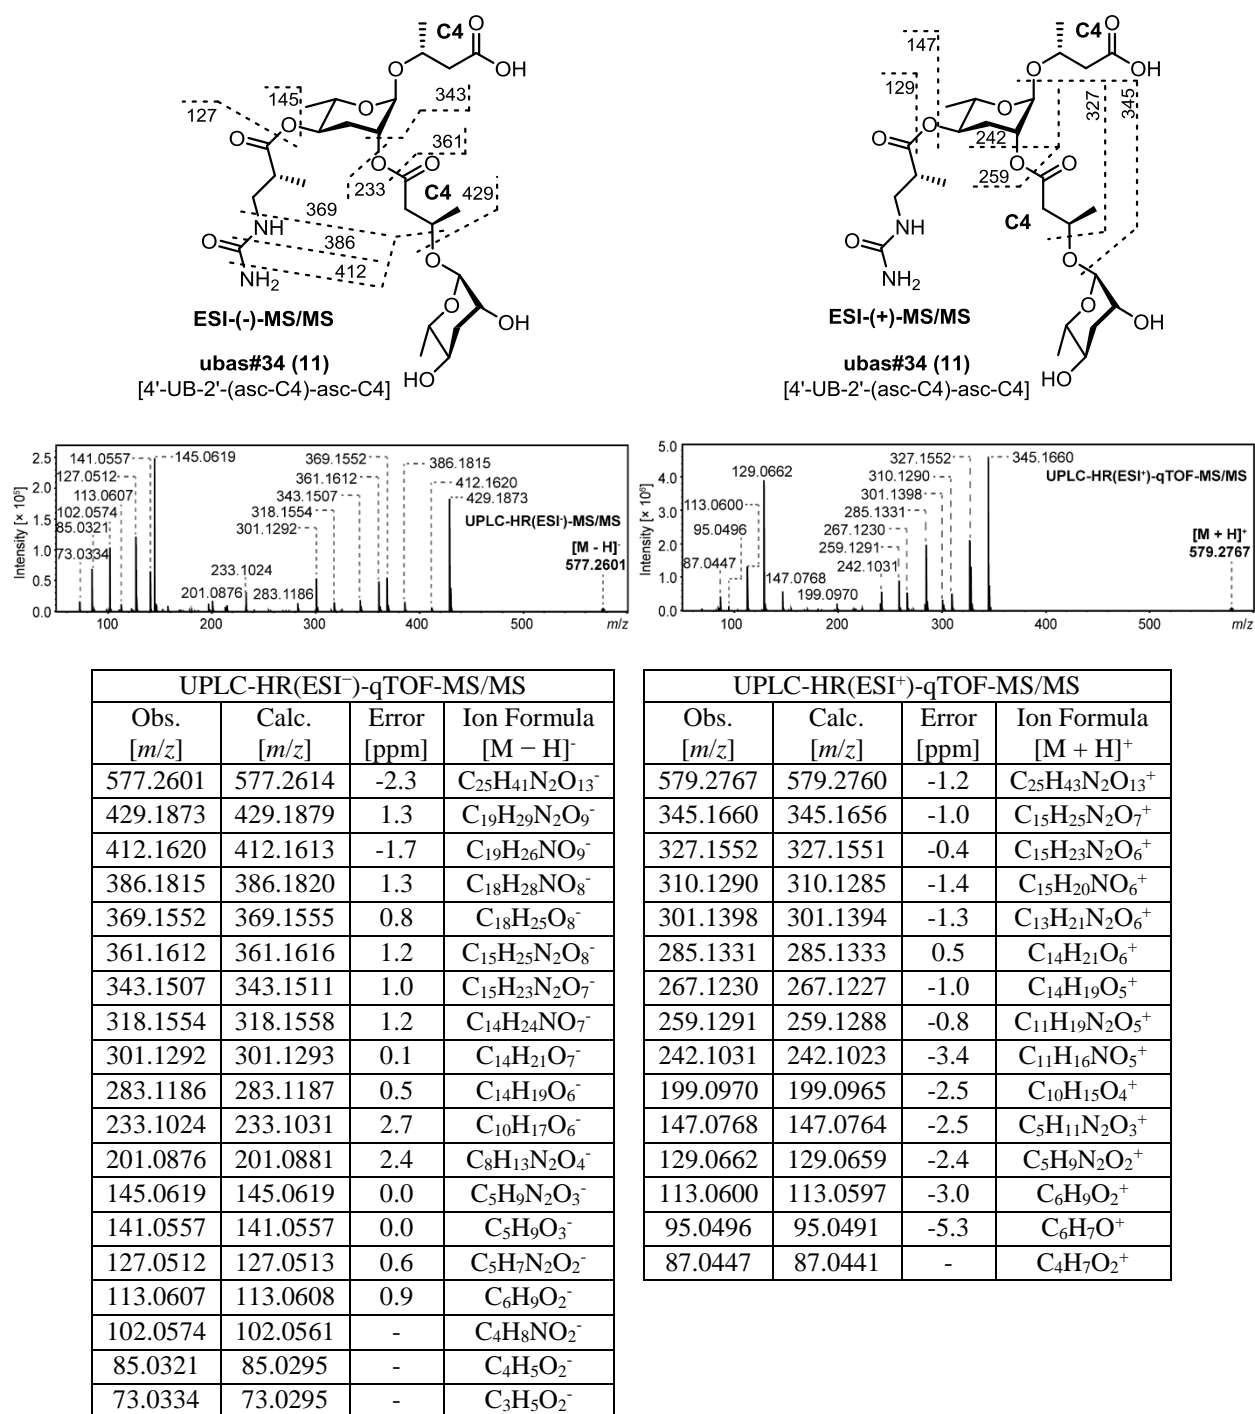

**Figure 9.** UPLC-HR(ESI<sup>+/+</sup>)-qTOF-MS/MS mass spectral data of ubas#34 [4'-UB-2'-(asc-C4)-asc-C4, **11**] in both negative and positive ion modes. UPLC-HR(ESI<sup>+</sup>)-qTOF-MS/MS fragmentation produced a fragment ion signal for C<sub>15</sub>H<sub>25</sub>N<sub>2</sub>O<sub>7</sub><sup>+</sup> ( $m/z$  345.1660 [M + H]<sup>+</sup>,  $\Delta$  -1.0 ppm) (*Figure 5 – figure supplement 3*), indicating that ascr#11 [asc-C4] represents the first ascaroside in ubas#34 [4'-UB-2'-(asc-C4)-asc-C4, **11**].

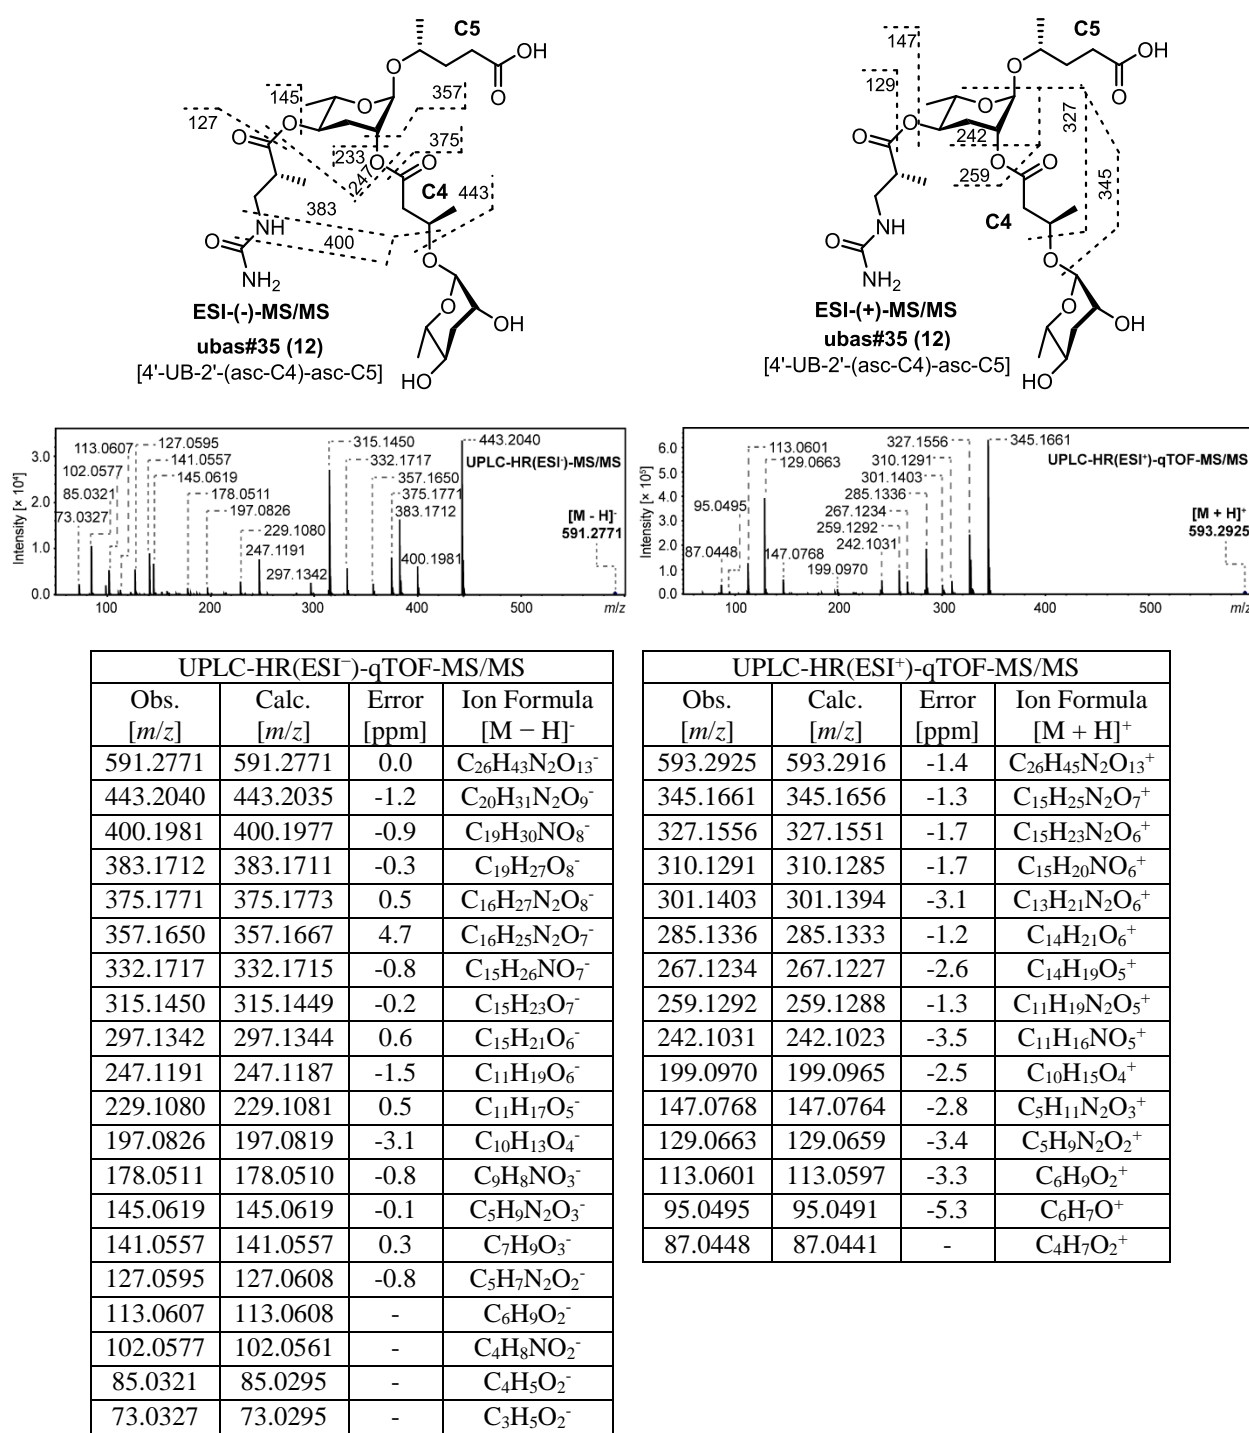

**Figure 10.** UPLC-HR(ESI<sup>+/+</sup>)-qTOF-MS/MS mass spectral data of ubas#35 [4'-UB-2'-(asc-C4)-asc-C5, 12] in both negative and positive ion modes. UPLC-HR(ESI<sup>+</sup>)-qTOF-MS/MS fragmentation produced a fragment ion signal for C<sub>15</sub>H<sub>25</sub>N<sub>2</sub>O<sub>7</sub><sup>+</sup> (*m/z* 345.1660 [M + H]<sup>+</sup>, Δ -1.0 ppm) (**Figure 5 – figure supplement 3**), indicating that ascr#11 [asc-C4] represents the first ascaroside in ubas#35 [4'-UB-2'-(asc-C4)-asc-C5, 12].

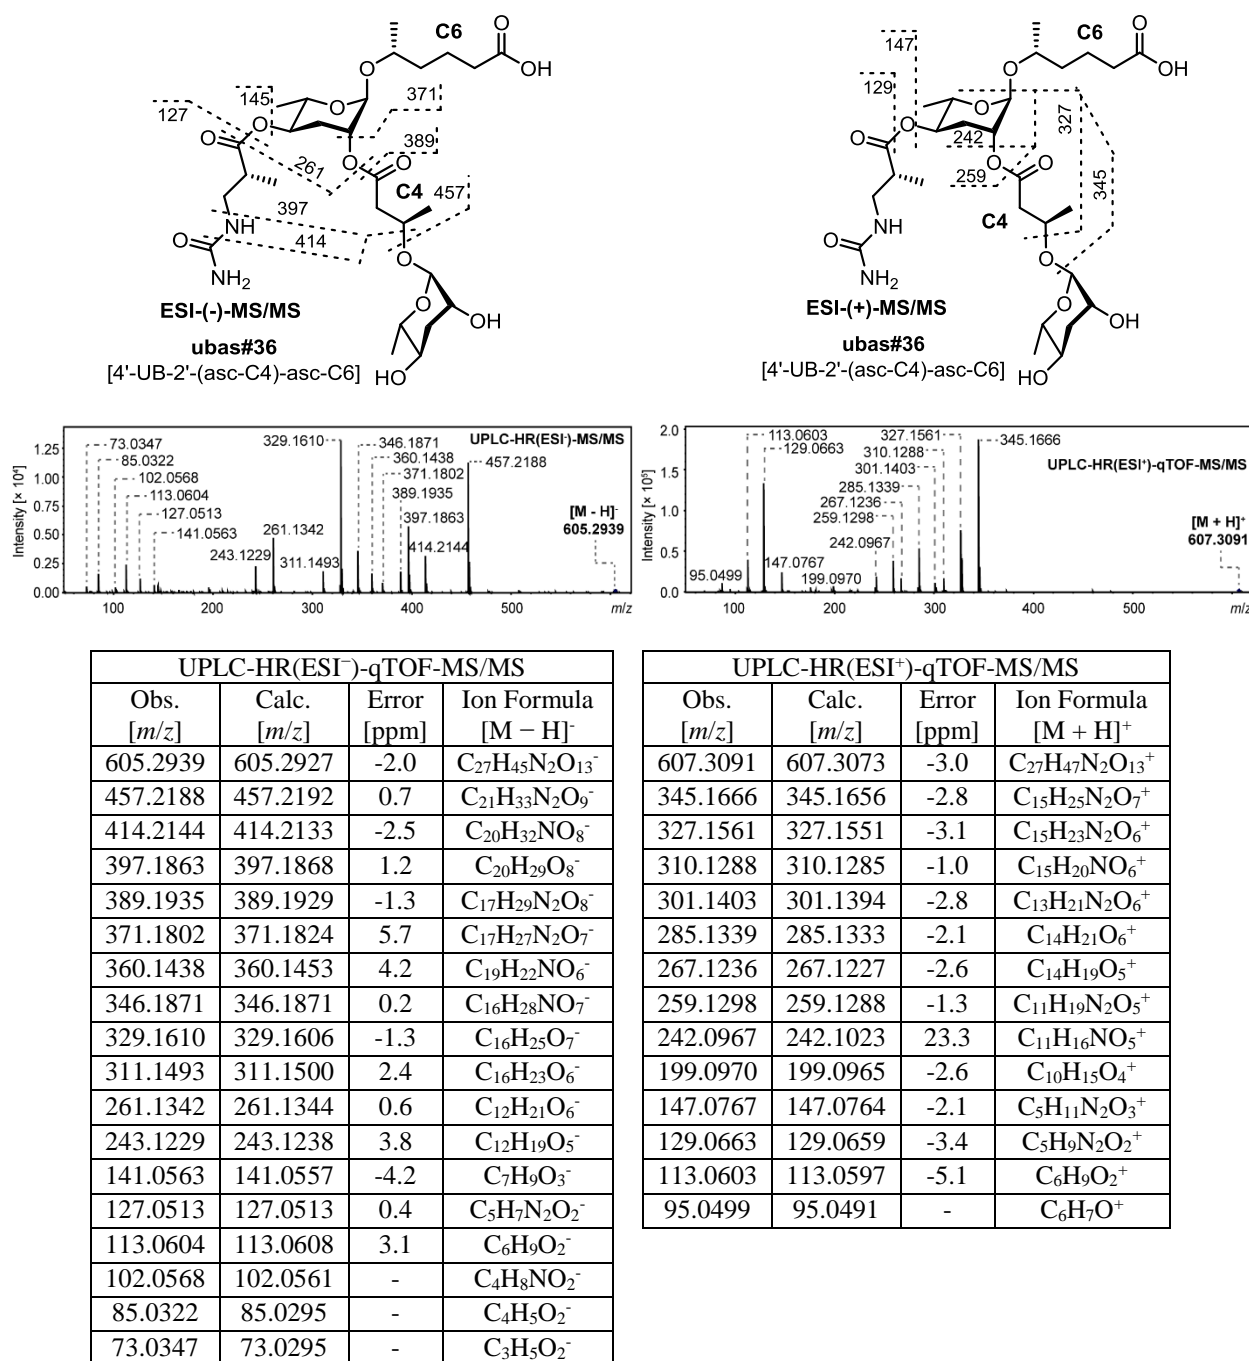

**Figure 11.** UPLC-HR(ESI<sup>±</sup>)-qTOF-MS/MS mass spectral data of ubas#36 [4'-UB-2'-(asc-C4)-asc-C6] in both negative and positive ion modes. UPLC-HR(ESI<sup>+</sup>)-qTOF-MS/MS fragmentation produced a fragment ion signal for C<sub>15</sub>H<sub>25</sub>N<sub>2</sub>O<sub>7</sub><sup>+</sup> (*m/z* 345.1660 [M + H]<sup>+</sup>, Δ -1.0 ppm) (**Figure 5 – figure supplement 3**), indicating that ascr#11 [asc-C4] represents the first ascaroside in ubas#36 [4'-UB-2'-(asc-C4)-asc-C6].

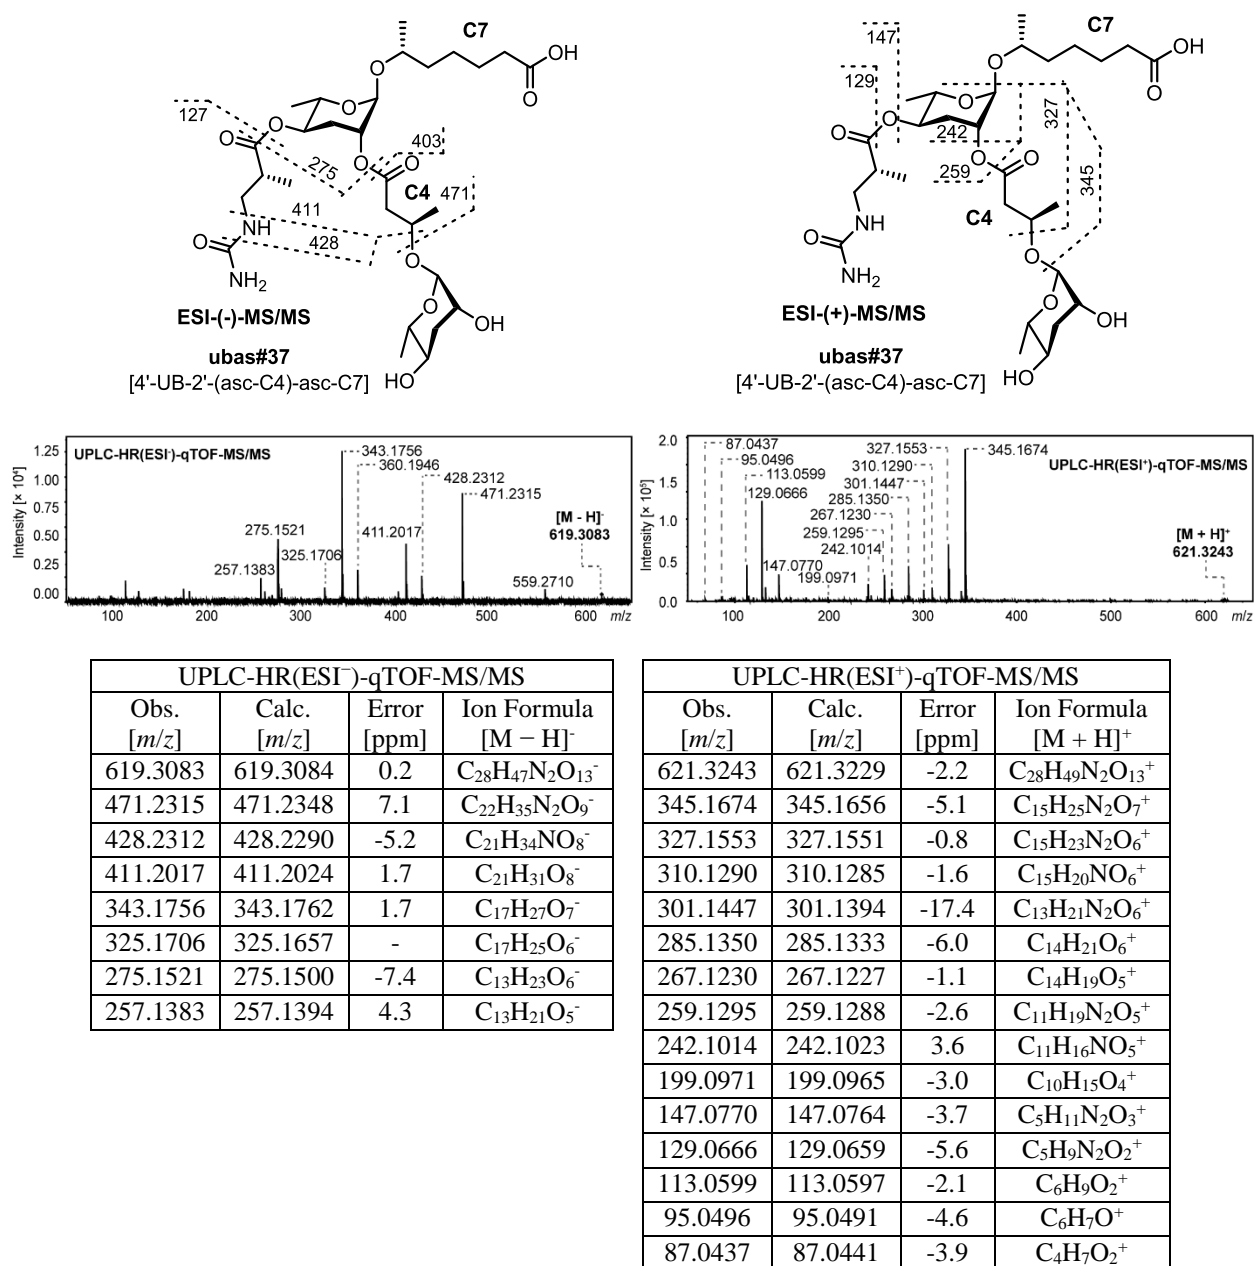

**Figure 12.** UPLC-HR(ESI<sup>±</sup>)-qTOF-MS/MS mass spectral data of ubas#37 [4'-UB-2'-(asc-C4)-asc-C7] in both negative and positive ion modes. UPLC-HR(ESI<sup>+</sup>)-qTOF-MS/MS fragmentation produced a fragment ion signal for C<sub>15</sub>H<sub>25</sub>N<sub>2</sub>O<sub>7</sub><sup>+</sup> ( $m/z$  345.1660 [M + H]<sup>+</sup>,  $\Delta$  -1.0 ppm) (**Figure 5 – figure supplement 3**), indicating that ascr#11 [asc-C4] represents the first ascaroside in ubas#37 [4'-UB-2'-(asc-C4)-asc-C7].

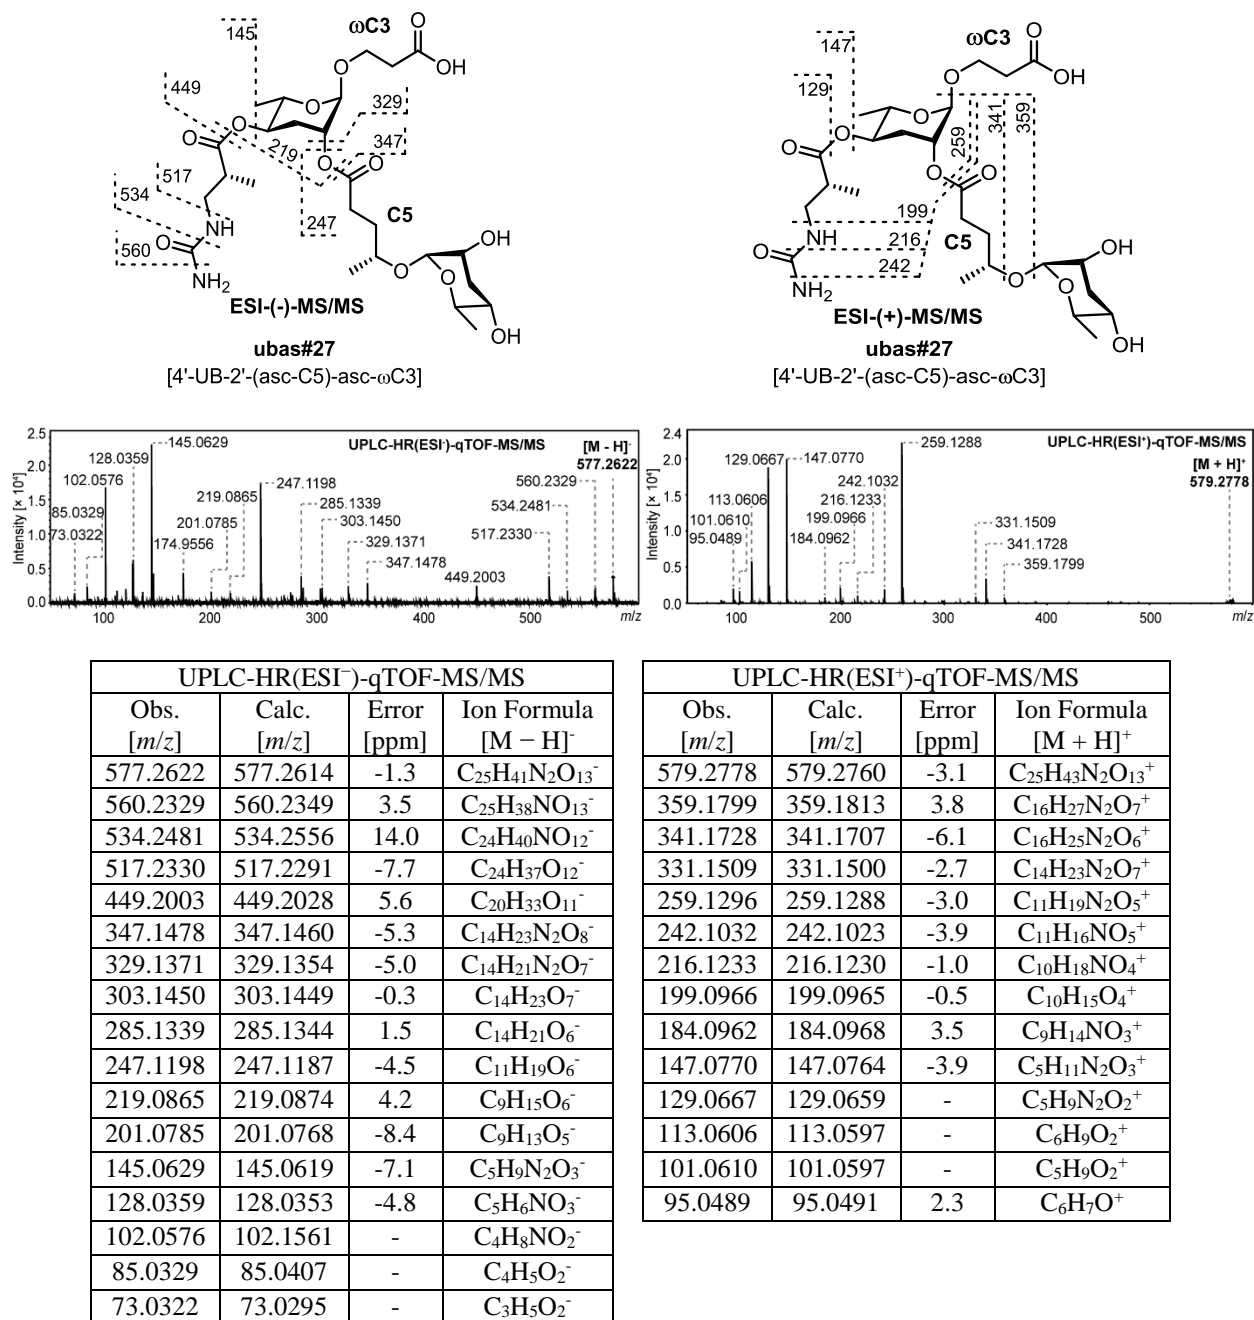

**Figure 13.** UPLC-HR(ESI<sup>+/−</sup>)-qTOF-MS/MS mass spectral data of ubas#27 [4'-UB-2'-(asc-C5)-asc-ωC3] in both negative and positive ion modes.

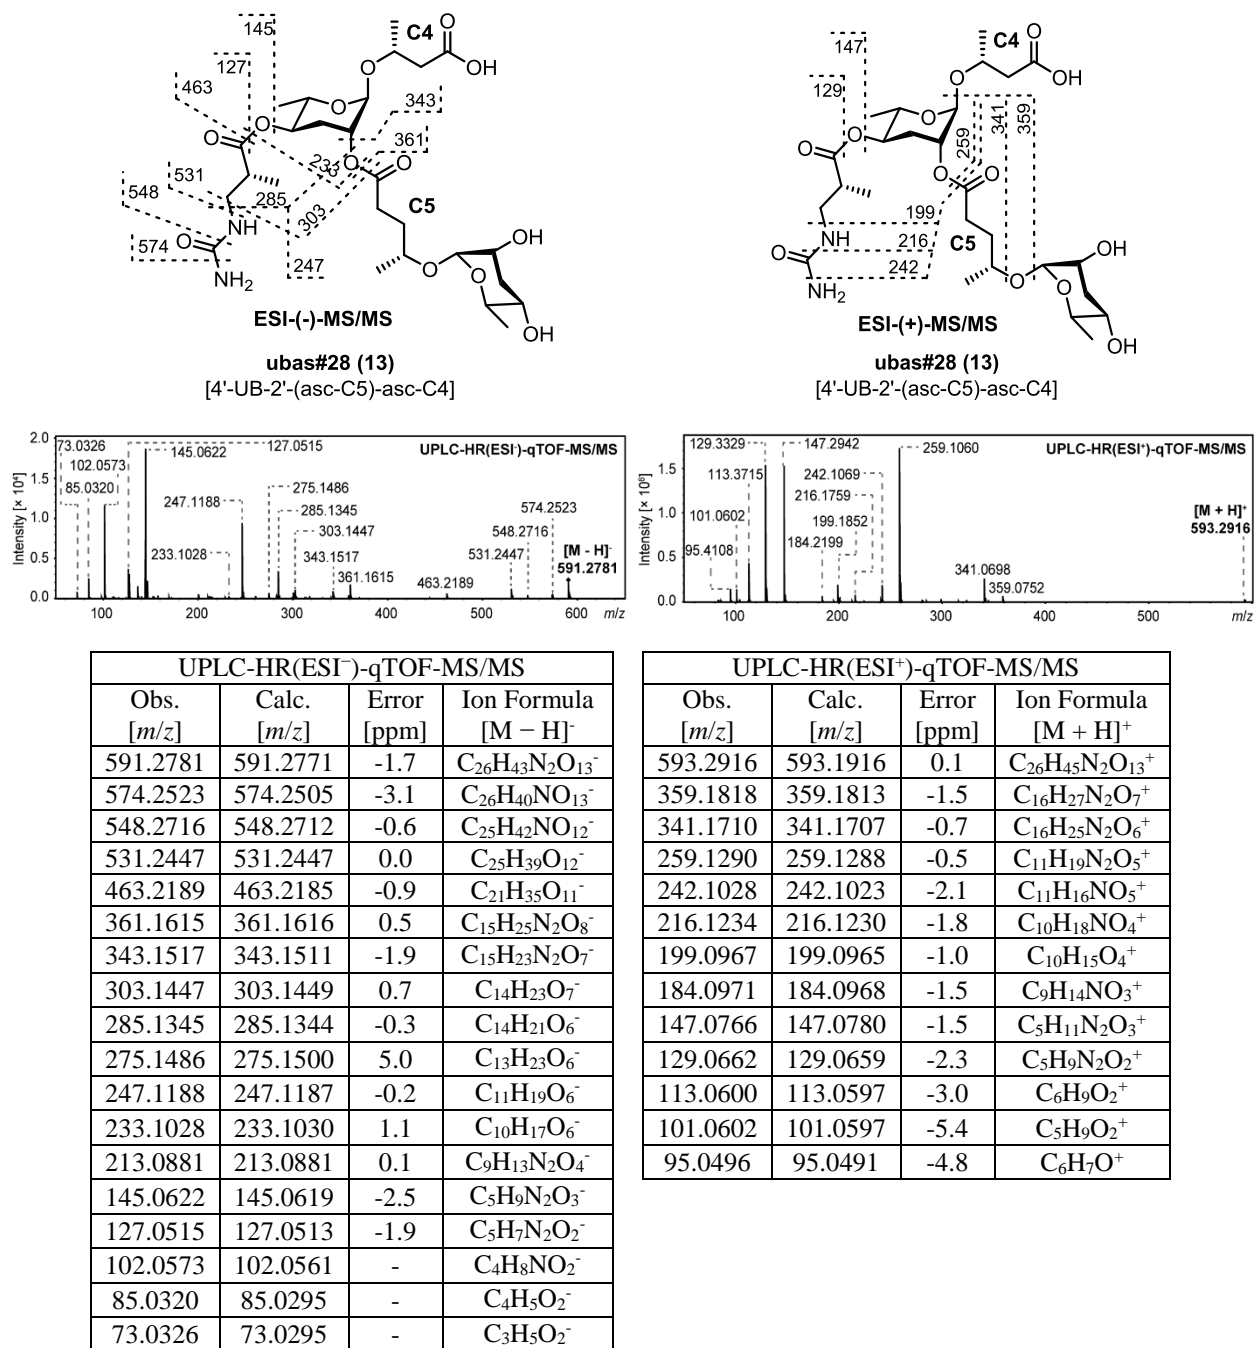

**Figure 14.** UPLC-HR(ESI<sup>+/+</sup>)-qTOF-MS/MS mass spectral data of ubas#28 [4'-UB-2'-(asc-C5)-asc-C4, 13] in both negative and positive ion modes.

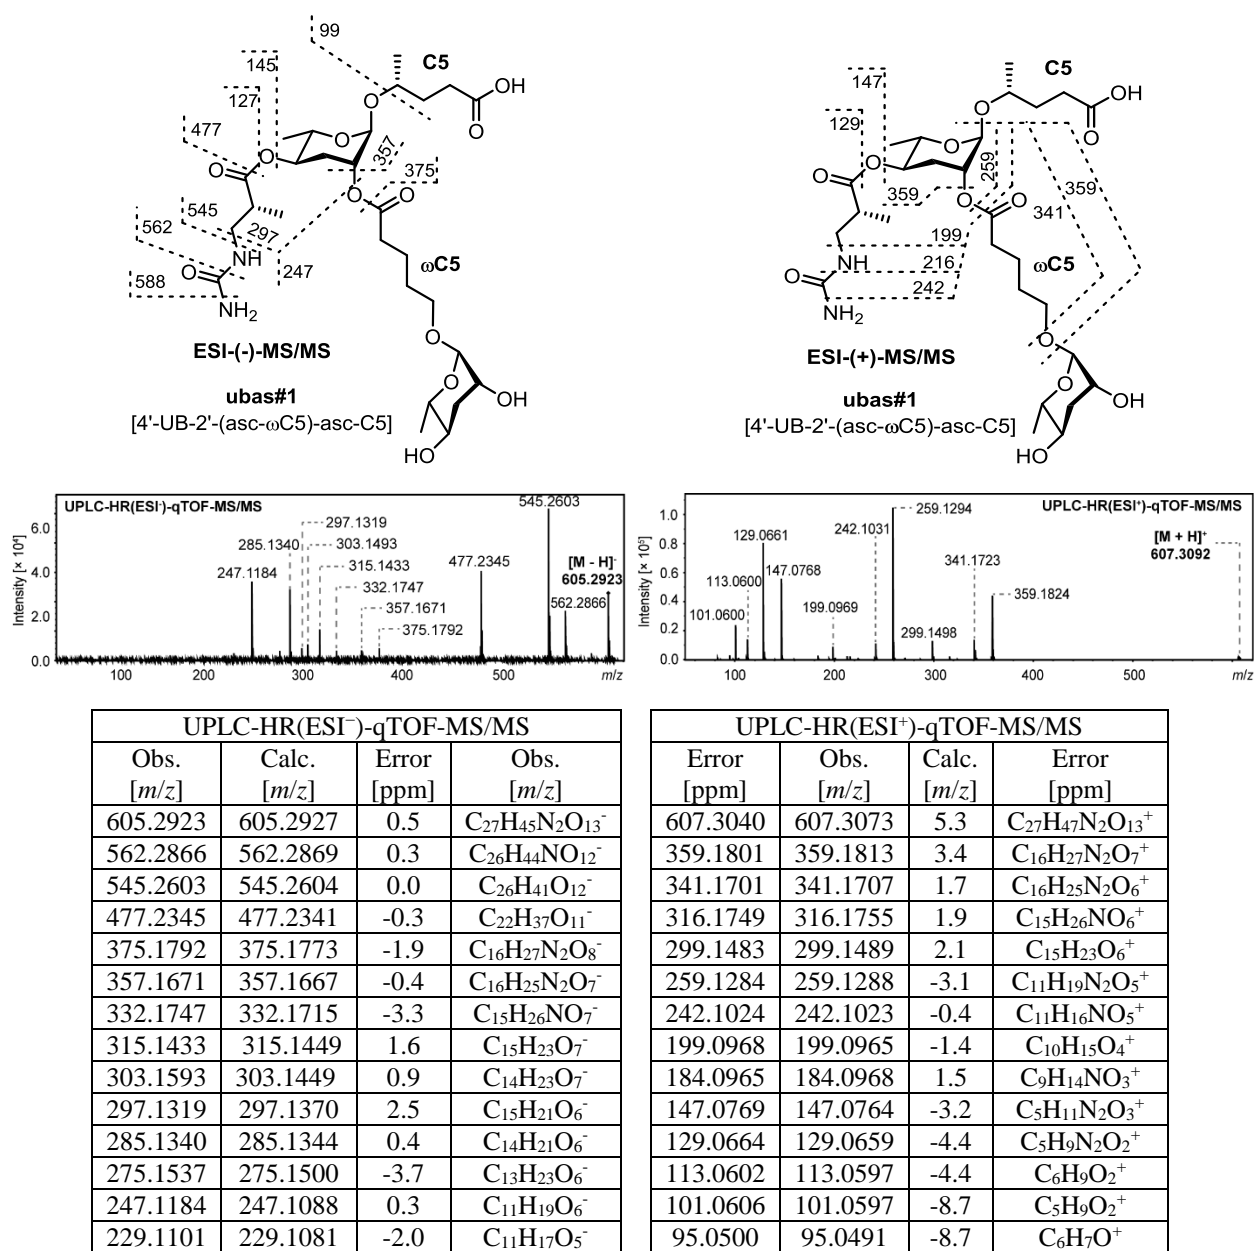

**Figure 15.** UPLC-HR(ESI<sup>+/+</sup>)-qTOF-MS/MS mass spectral data of ubas#1 [4'-UB-2'-(asc- $\omega$ C5)-asc-C5] (from *P. taiwanensis*) in both negative and positive ion modes. Analysis of NMR data of ubas#1 isolated from the *exo*-metabolome of *P. taiwanensis* has confirmed its chemical identity (*supplementary file 1d – Figures 12-15*).

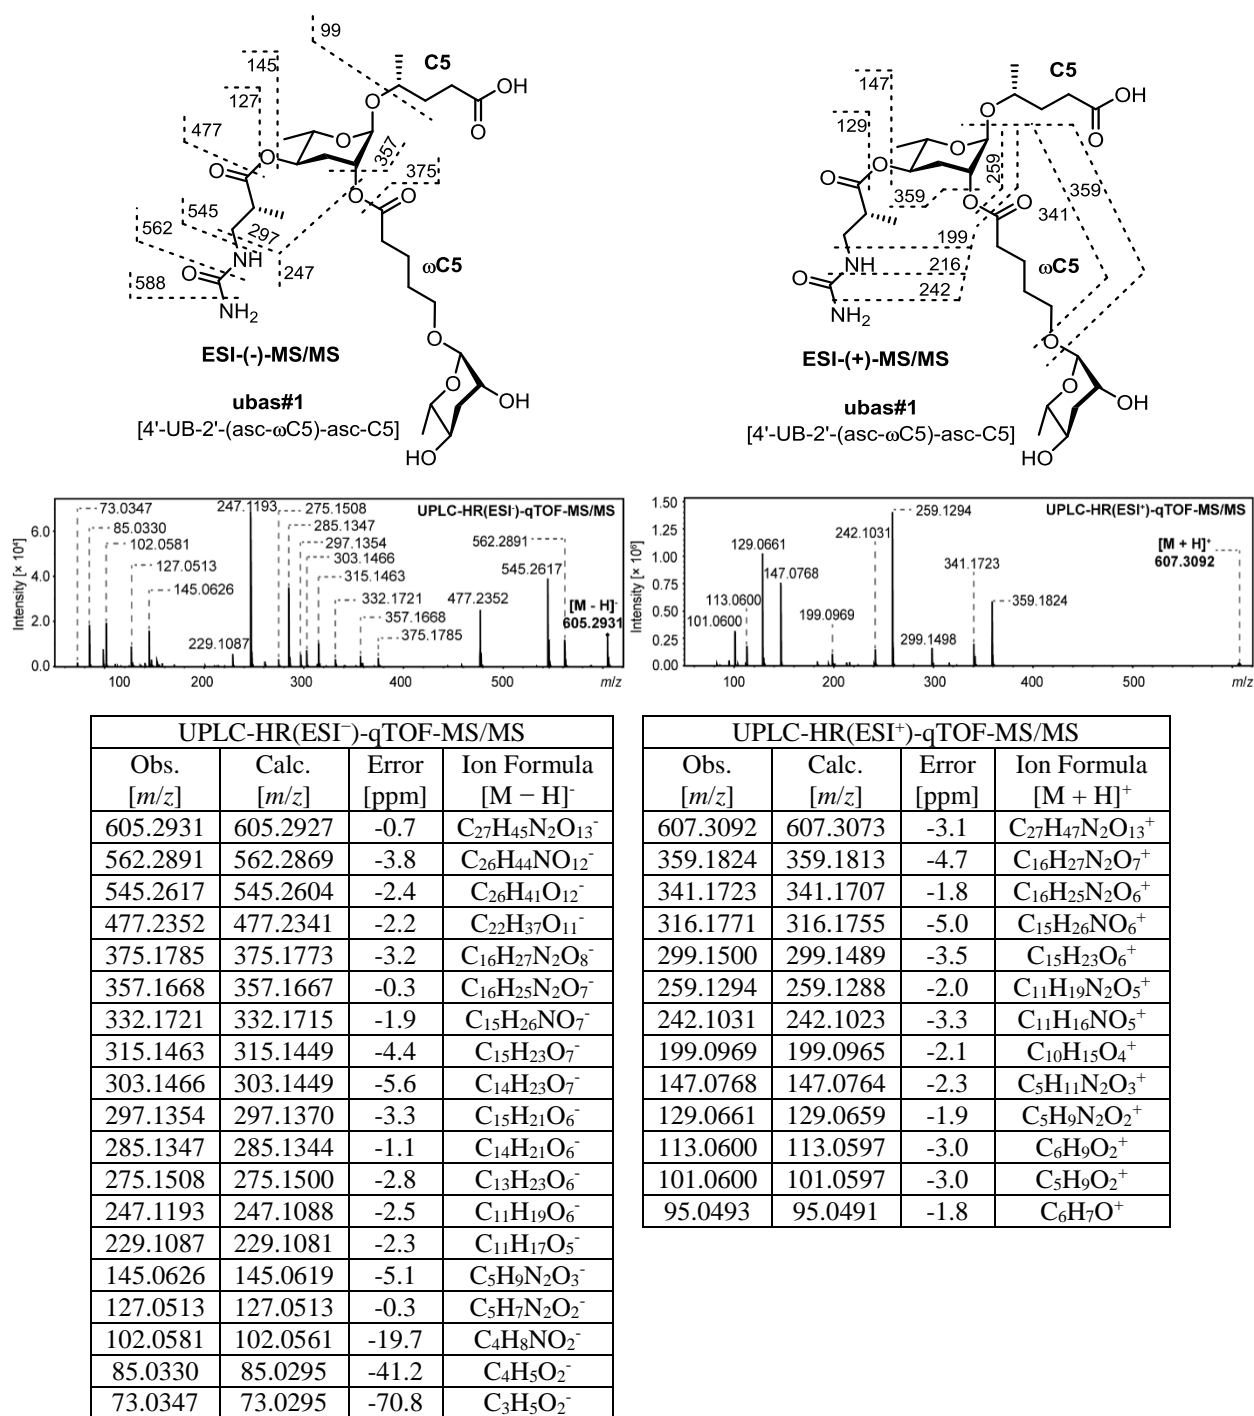

**Figure 16.** UPLC-HR(ESI<sup>±</sup>)-qTOF-MS/MS mass spectral data of ubas#1 [4'-UB-2'-(asc-ωC5)-asc-C5] (from *P. laevis*) in both negative and positive ion modes. Analysis of NMR data of ubas#1 isolated from the *exo*-metabolome of *P. laevis* confirmed its chemical identity (*supplementary file 1d – Figures 16-19*).

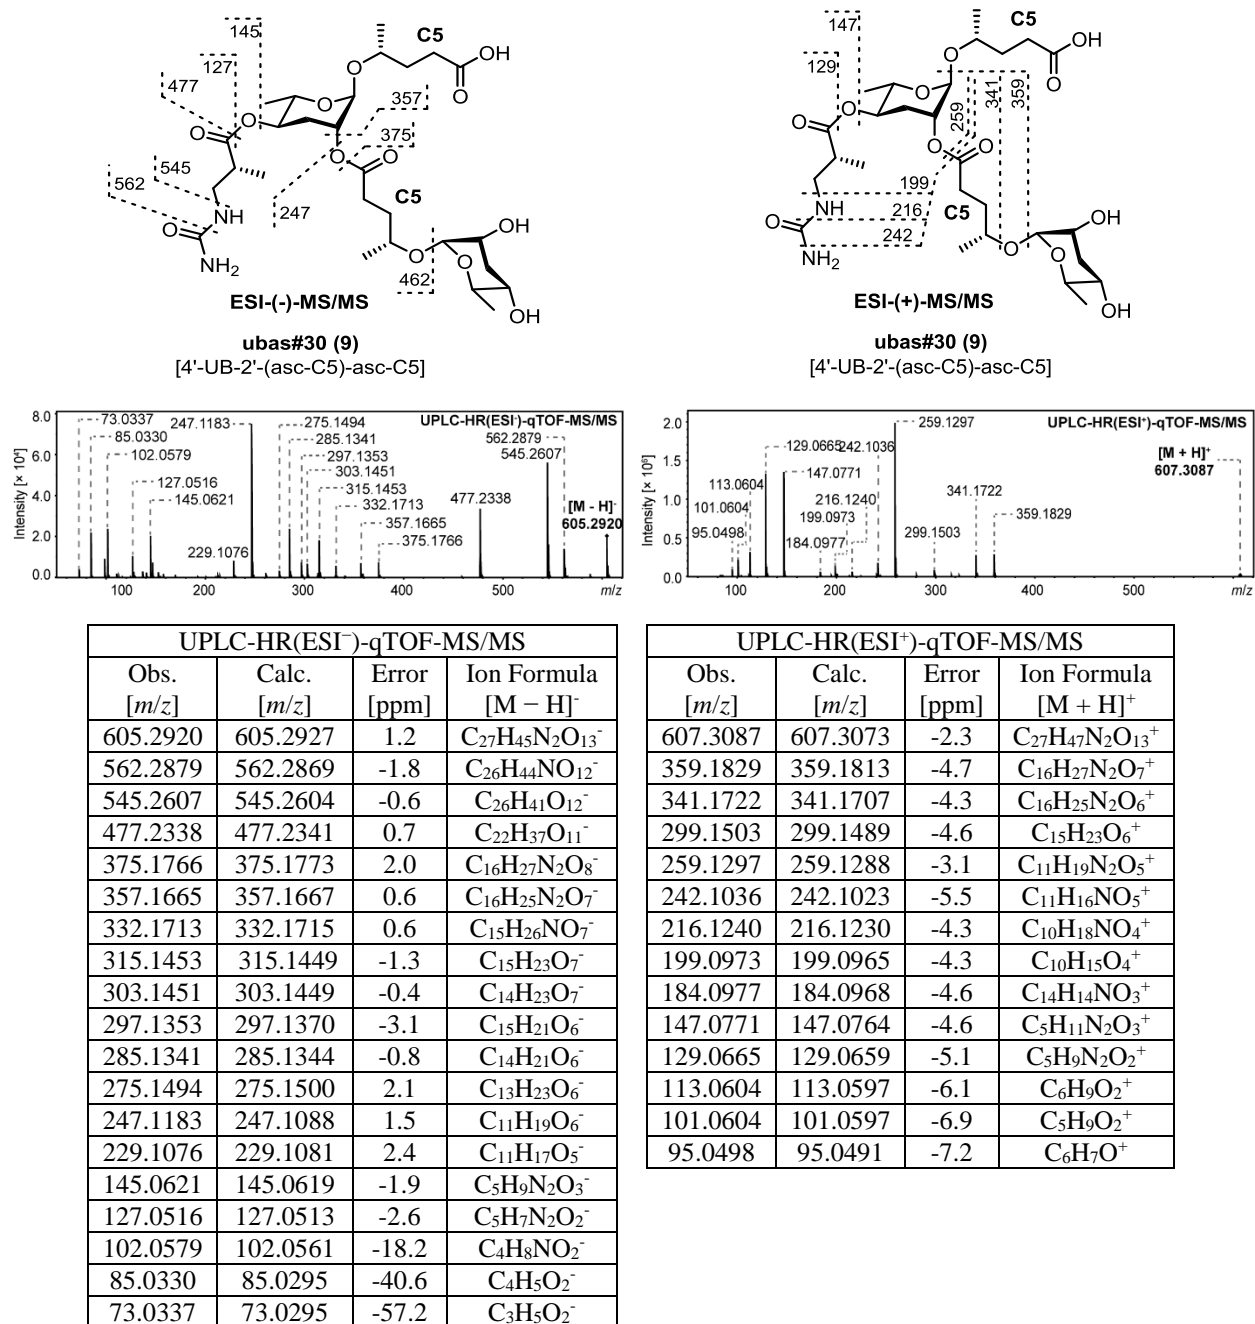

**Figure 17.** UPLC-HR(ESI<sup>+/+</sup>)-qTOF-MS/MS mass spectral data of ubas#30 [4'-UB-2'-(asc-C5)-asc-C5, 9] (from *P. maxplancki*) in both negative and positive ion modes.

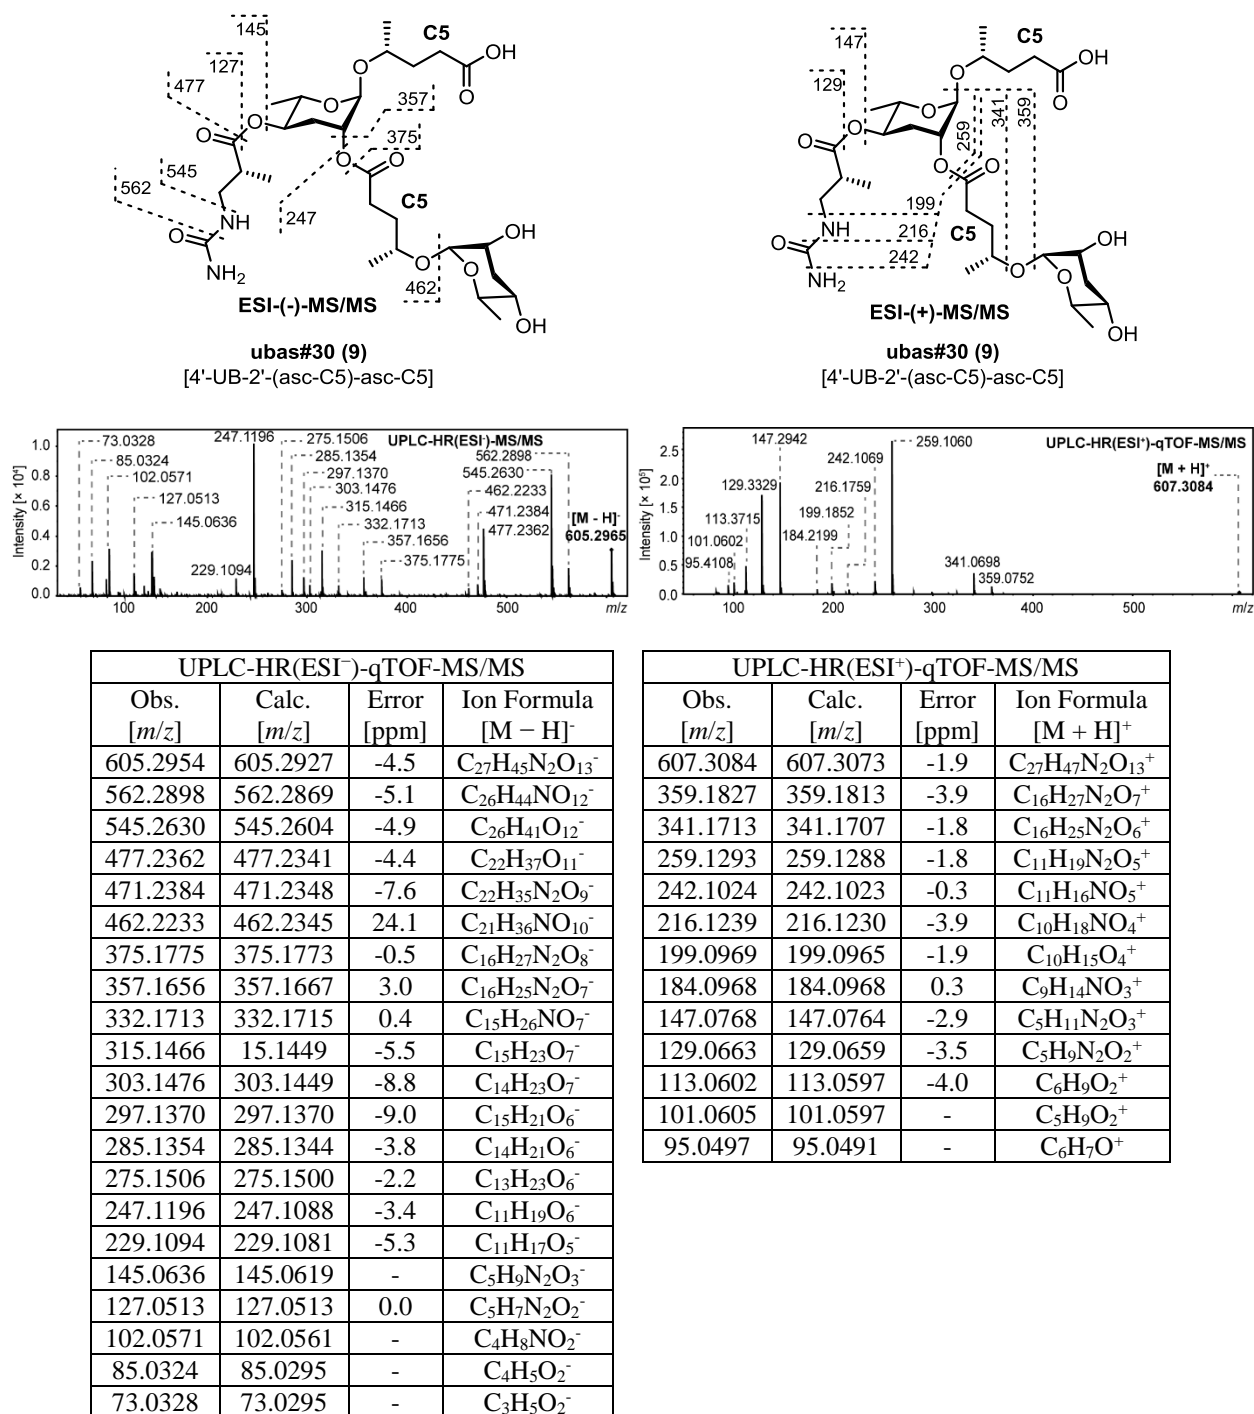

**Figure 18.** UPLC-HR(ESI<sup>+/+</sup>)-qTOF-MS/MS mass spectral data of ubas#30 [4'-UB-2'-(asc-C5)-asc-C5, **9**] (from *P. fukushima*) in both negative and positive ion modes. Peak at *m/z* 605.2954 was tentatively assigned to be ubas#30 [4'-UB-2'-(asc-C5)-asc-C5, **9**].

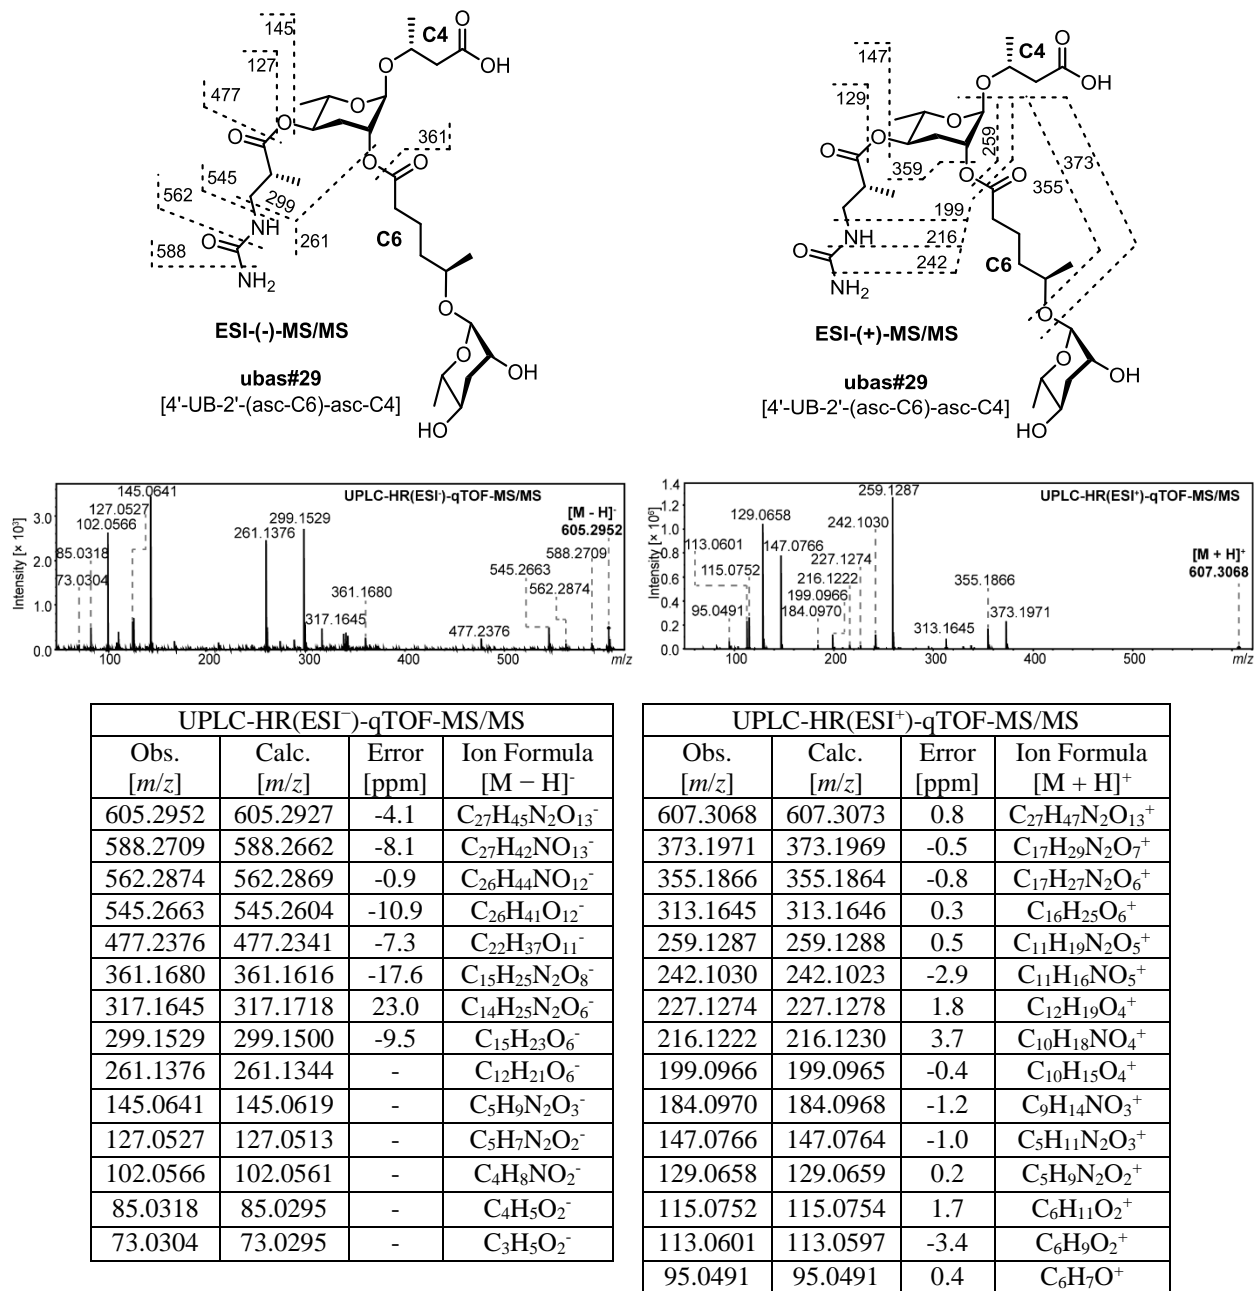

**Figure 19.** UPLC-HR(ESI<sup>±</sup>)-qTOF-MS/MS mass spectral data of ubas#29 [4'-UB-2'-(asc-C6)-asc-C4] in both negative and positive ion modes.

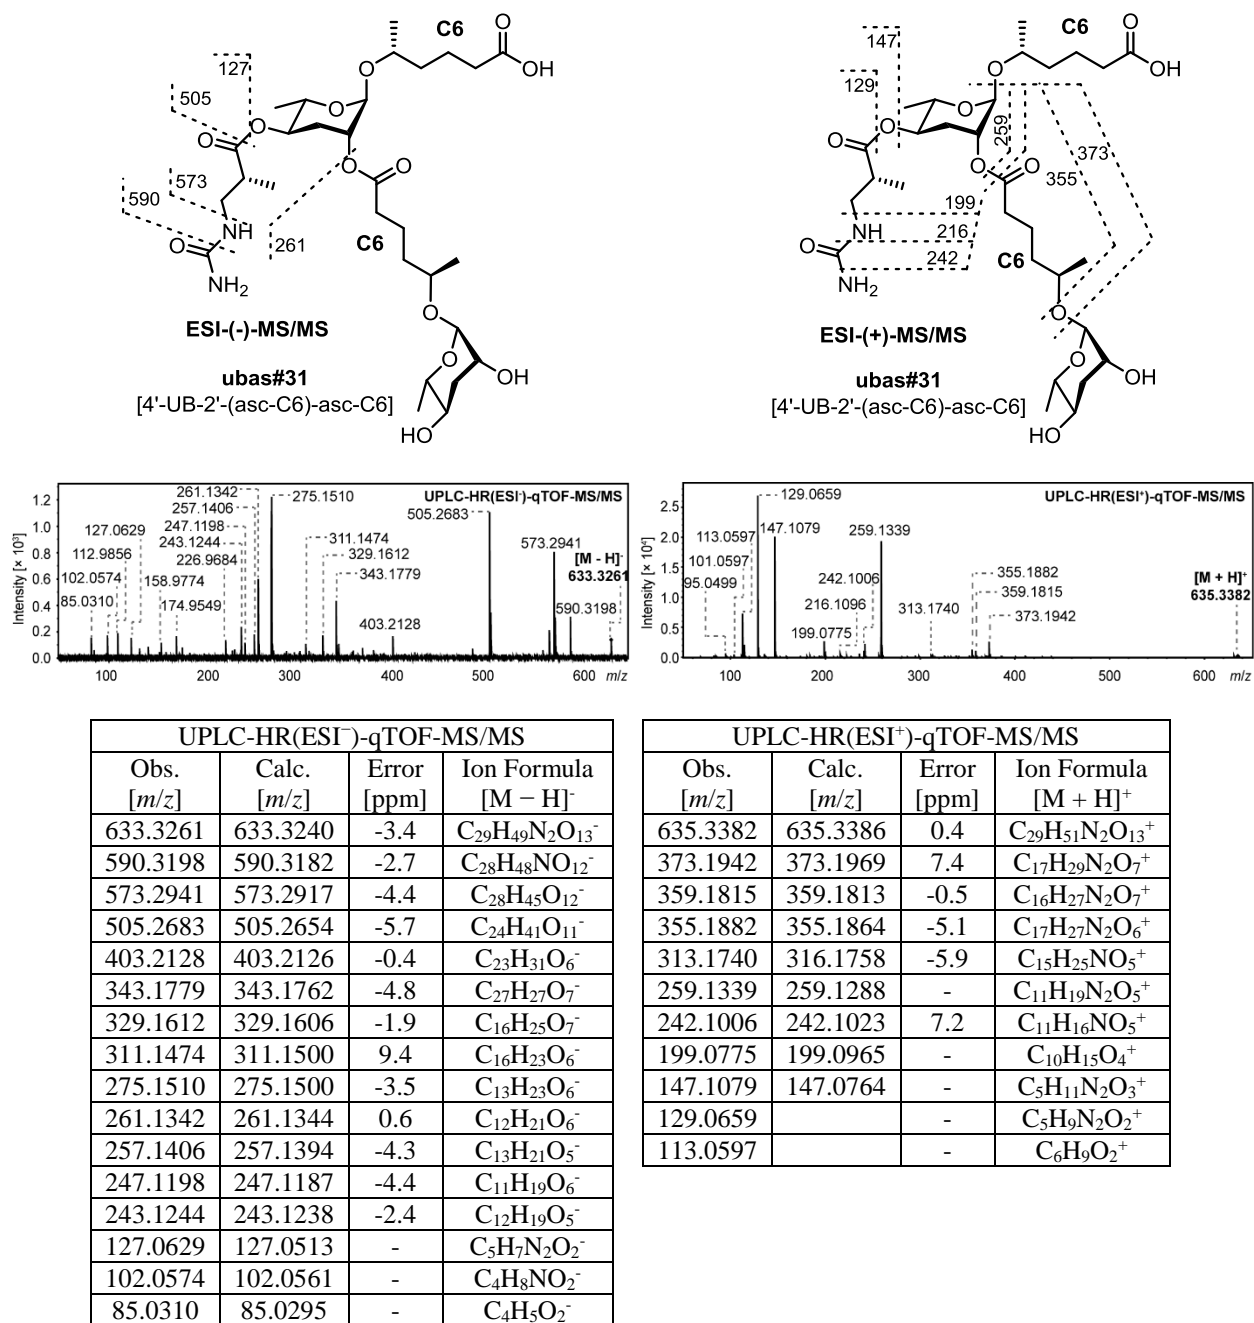

**Figure 20.** UPLC-HR(ESI<sup>+/+</sup>)-qTOF-MS/MS mass spectral data of ubas#31 [4'-UB-2'-(asc-C6)-asc-C6] in both negative and positive ion modes.

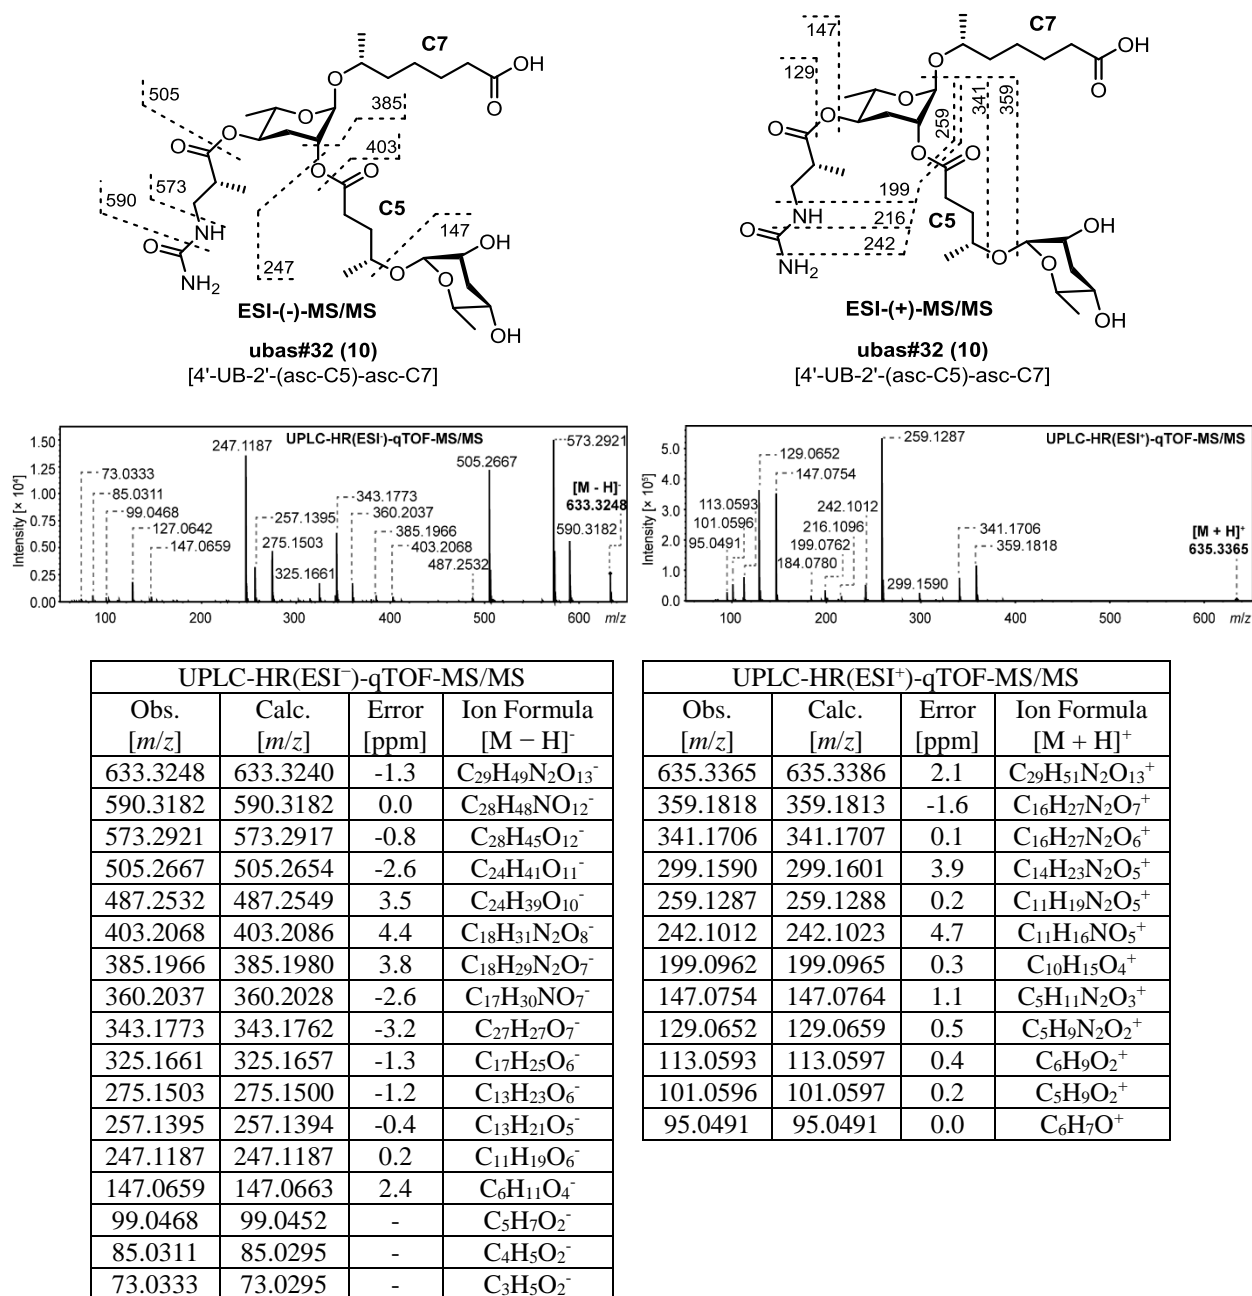

**Figure 21.** UPLC-HR(ESI<sup>+/+</sup>)-qTOF-MS/MS mass spectral data of ubas#32 [4'-UB-2'-(asc-C5)-asc-C7, **10**] in both negative and positive ion modes. Analysis of the *dqf*-COSY spectrum of ubas#32 [4'-UB-2'-(asc-C5)-asc-C7, **10**] (800 MHz, CD<sub>3</sub>OD) enriched from the *exo*-metabolome of *P. maxplancki* confirmed the presence of one 2'- and 4'-substituted ascarylose sugar, an unsubstituted ascarylose moiety, one (ω-1)-hydroxylated C5 side chain and one (ω-1)-hydroxylated C7 side chain in ubas#32 (*supplementary file 1d* – *Figure 20*).

|                                                                                                                     |       |
|---------------------------------------------------------------------------------------------------------------------|-------|
| <b>supplementary file 2d: MS/MS spectral data of UPAS chemicals</b>                                                 | Pages |
| <b>Figure 1.</b> LC-HR( $\text{ESI}^{-/+}$ )-MS/MS spectral data of upas#5 [4'-UP-asc-C4].                          | S48   |
| <b>Figure 2.</b> LC-HR( $\text{ESI}^{-/+}$ )-MS/MS spectral data of upas#3 [4'-UP-asc-C5].                          | S49   |
| <b>Figure 3.</b> LC-HR( $\text{ESI}^{-/+}$ )-MS/MS spectral data of upas#4 [4'-UP-asc-C7].                          | S50   |
| <b>Figure 4.</b> LC-HR( $\text{ESI}^{-/+}$ )-MS/MS spectral data of upas#34 [4'-UP-2'-(asc-C4)-asc-C4, <b>14</b> ]. | S51   |
| <b>Figure 5.</b> LC-HR( $\text{ESI}^{-/+}$ )-MS/MS spectral data of upas#28 [4'-UP-2'-(asc-C5)-asc-C4, <b>15</b> ]. | S52   |
| <b>Figure 6.</b> LC-HR( $\text{ESI}^{-/+}$ )-MS/MS spectral data of upas#30 [4'-UP-2'-(asc-C5)-asc-C5].             | S53   |
| <b>Figure 7.</b> LC-HR( $\text{ESI}^{-/+}$ )-MS/MS spectral data of upas#32 [4'-UP-2'-(asc-C5)-asc-C7].             | S54   |

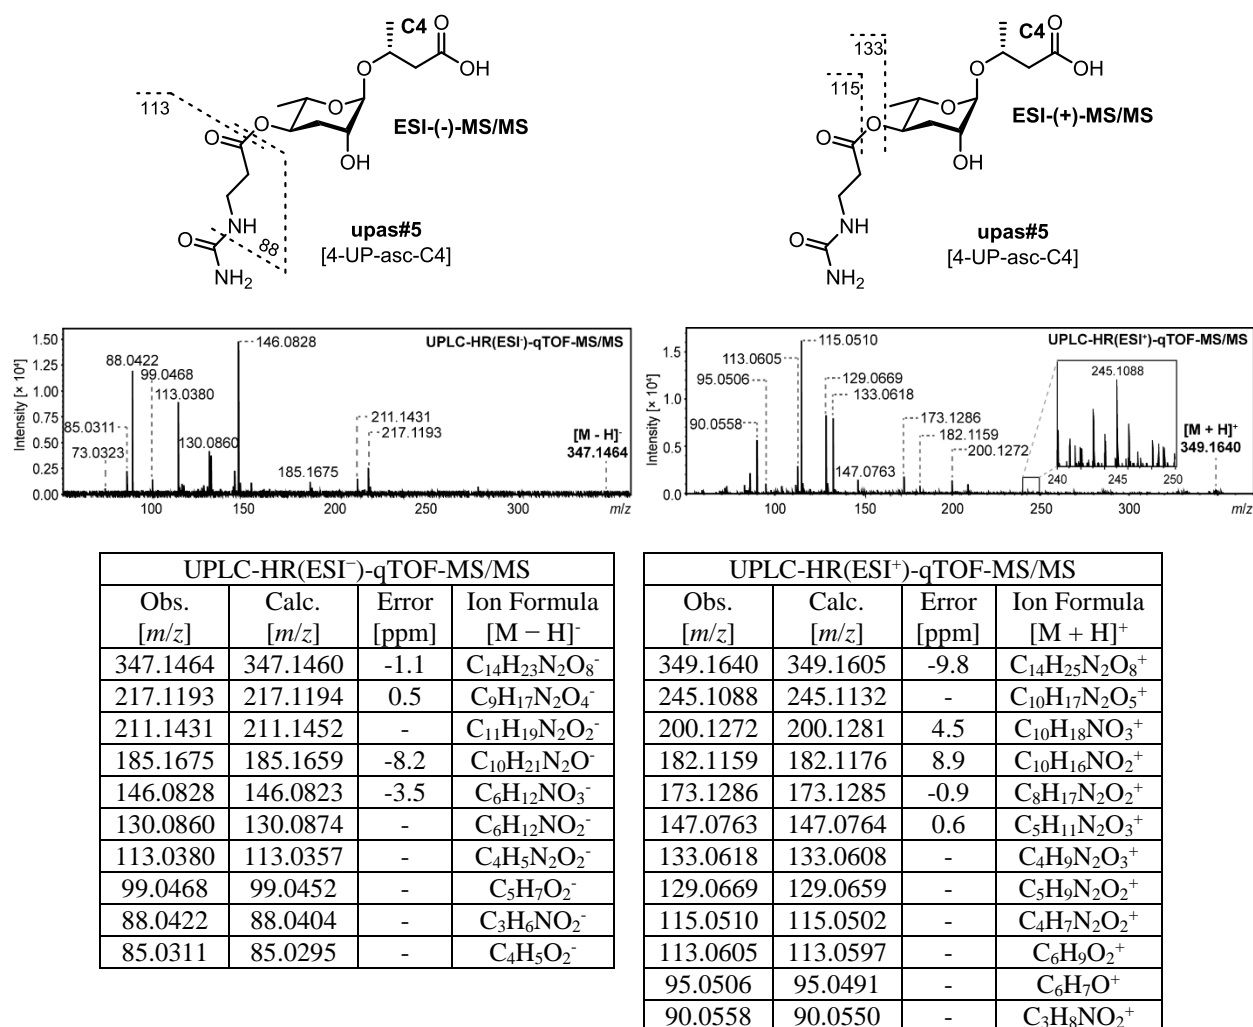

**Figure 1.** UPLC-HR(ESI<sup>+/+</sup>)-qTOF-MS/MS mass spectral data of upas#5 [4'-UP-asc-C4] in both negative and positive ion modes.

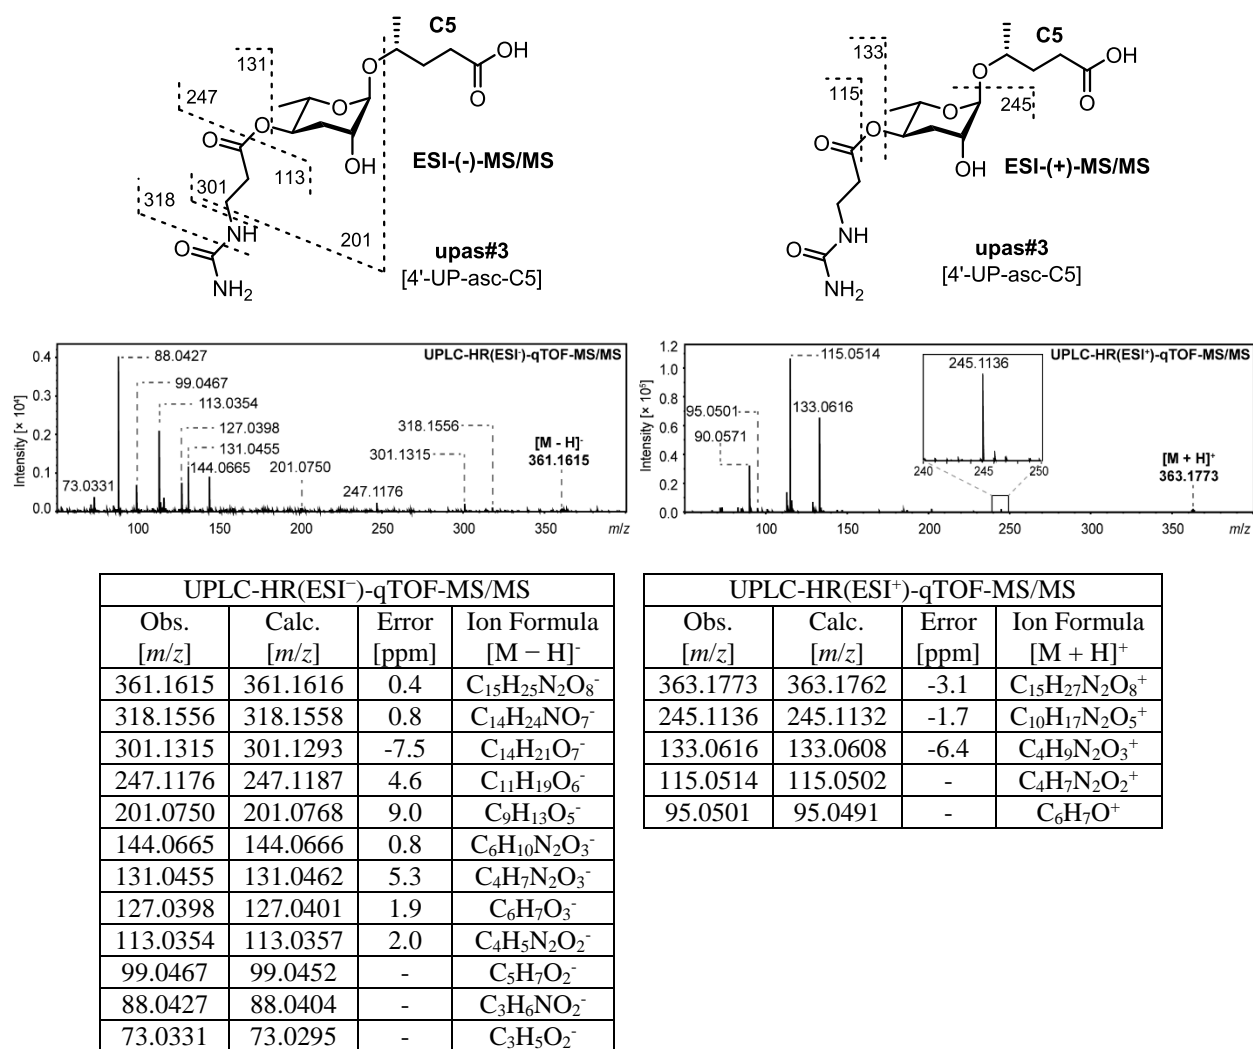

**Figure 2.** UPLC-HR(ESI<sup>-/+</sup>)-qTOF-MS/MS mass spectral data of upas#3 [4'-UP-asc-C5] in both negative and positive ion modes.

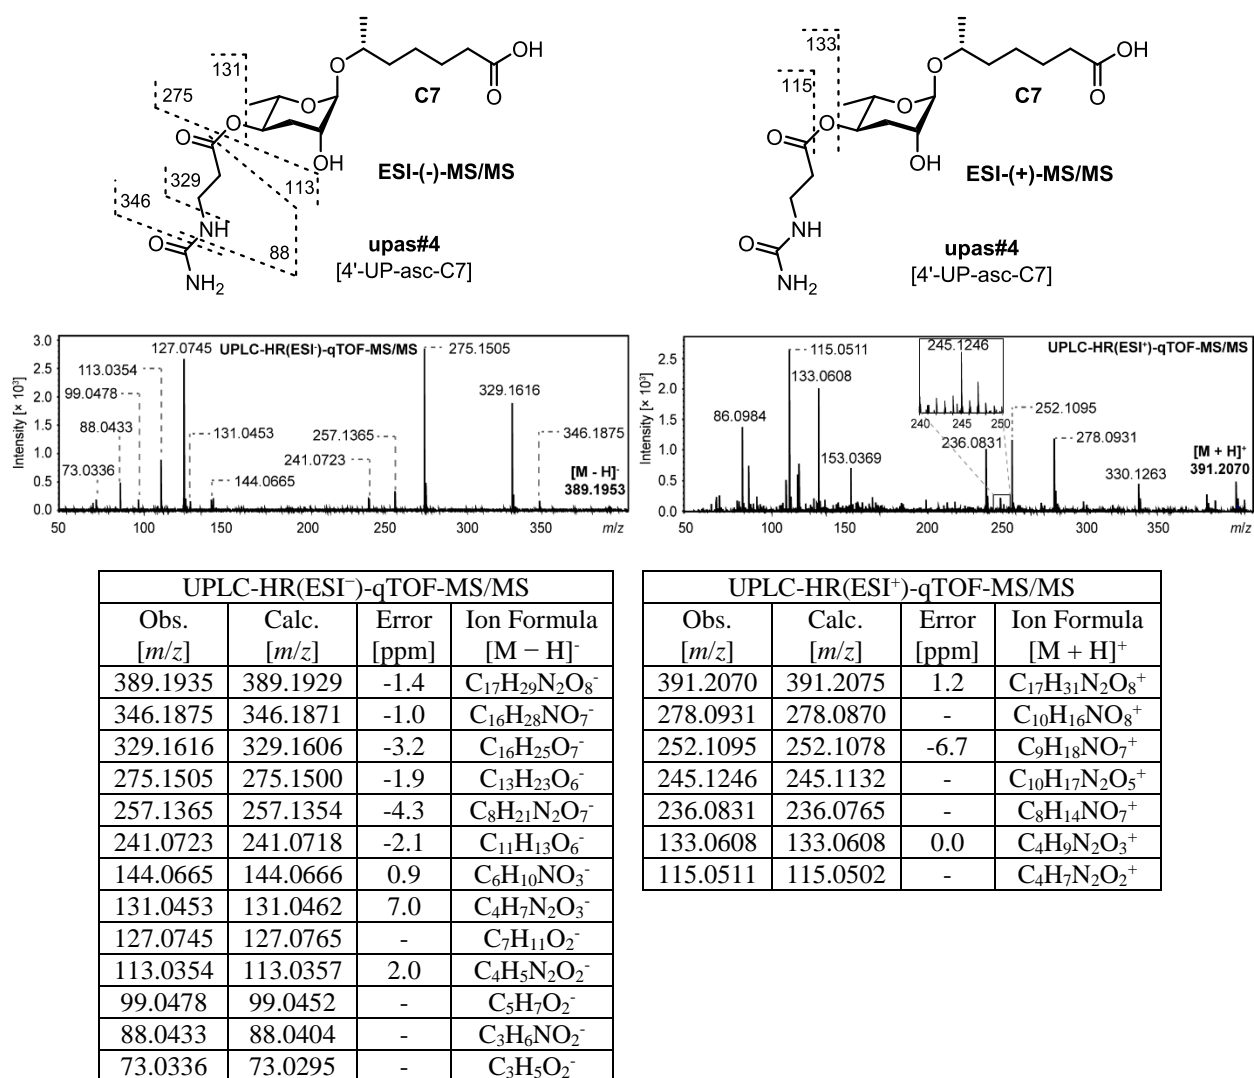

**Figure 3.** UPLC-HR(ESI<sup>±</sup>)-qTOF-MS/MS mass spectral data of upas#4 [4'-UP-asc-C7] in both negative and positive ion modes.

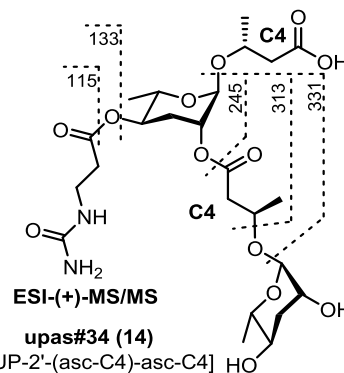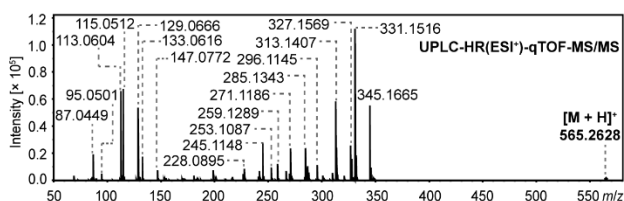

| UPLC-HR(ESI <sup>+</sup> )-qTOF-MS/MS |                |                |                                                                             |
|---------------------------------------|----------------|----------------|-----------------------------------------------------------------------------|
| Obs.<br>[m/z]                         | Calc.<br>[m/z] | Error<br>[ppm] | Ion Formula<br>[M + H] <sup>+</sup>                                         |
| 565.2628                              | 565.2603       | -4.3           | C <sub>24</sub> H <sub>41</sub> N <sub>2</sub> O <sub>13</sub> <sup>+</sup> |
| 345.1665                              | 345.1656       | -2.4           | C <sub>15</sub> H <sub>25</sub> N <sub>2</sub> O <sub>7</sub> <sup>+</sup>  |
| 331.1516                              | 331.1500       | -4.8           | C <sub>14</sub> H <sub>23</sub> N <sub>2</sub> O <sub>7</sub> <sup>+</sup>  |
| 327.1569                              | 327.1551       | -5.5           | C <sub>15</sub> H <sub>23</sub> N <sub>2</sub> O <sub>6</sub> <sup>+</sup>  |
| 313.1407                              | 313.1394       | -4.1           | C <sub>14</sub> H <sub>21</sub> N <sub>2</sub> O <sub>6</sub> <sup>+</sup>  |
| 296.1145                              | 296.1129       | -5.6           | C <sub>14</sub> H <sub>18</sub> NO <sub>6</sub> <sup>+</sup>                |
| 285.1343                              | 285.1333       | -3.5           | C <sub>14</sub> H <sub>21</sub> O <sub>6</sub> <sup>+</sup>                 |
| 271.1186                              | 271.1176       | -3.8           | C <sub>13</sub> H <sub>19</sub> O <sub>6</sub> <sup>+</sup>                 |
| 259.1289                              | 259.1288       | -0.3           | C <sub>11</sub> H <sub>19</sub> N <sub>2</sub> O <sub>5</sub> <sup>+</sup>  |
| 253.1087                              | 253.1071       | -6.6           | C <sub>13</sub> H <sub>17</sub> O <sub>5</sub> <sup>+</sup>                 |
| 245.1148                              | 245.1132       | -6.4           | C <sub>10</sub> H <sub>17</sub> N <sub>2</sub> O <sub>5</sub> <sup>+</sup>  |
| 228.0895                              | 228.0866       | -              | C <sub>10</sub> H <sub>14</sub> NO <sub>5</sub> <sup>+</sup>                |
| 217.1083                              | 217.1071       | -5.9           | C <sub>10</sub> H <sub>17</sub> O <sub>5</sub> <sup>+</sup>                 |
| 199.0985                              | 199.0965       | -              | C <sub>10</sub> H <sub>15</sub> O <sub>4</sub> <sup>+</sup>                 |
| 181.0870                              | 181.0859       | -6.1           | C <sub>10</sub> H <sub>13</sub> O <sub>3</sub> <sup>+</sup>                 |
| 147.0772                              | 147.0764       | -5.1           | C <sub>5</sub> H <sub>11</sub> N <sub>2</sub> O <sub>3</sub> <sup>+</sup>   |
| 133.0616                              | 133.0608       | -6.0           | C <sub>4</sub> H <sub>9</sub> N <sub>2</sub> O <sub>3</sub> <sup>+</sup>    |
| 115.0512                              | 115.0502       | -              | C <sub>4</sub> H <sub>7</sub> N <sub>2</sub> O <sub>2</sub> <sup>+</sup>    |
| 113.0604                              | 113.0597       | -              | C <sub>6</sub> H <sub>9</sub> O <sub>2</sub> <sup>+</sup>                   |
| 95.0501                               | 95.0491        | -              | C <sub>6</sub> H <sub>7</sub> O <sup>+</sup>                                |
| 87.0449                               | 87.0441        | -              | C <sub>4</sub> H <sub>7</sub> O <sub>2</sub> <sup>+</sup>                   |

S51

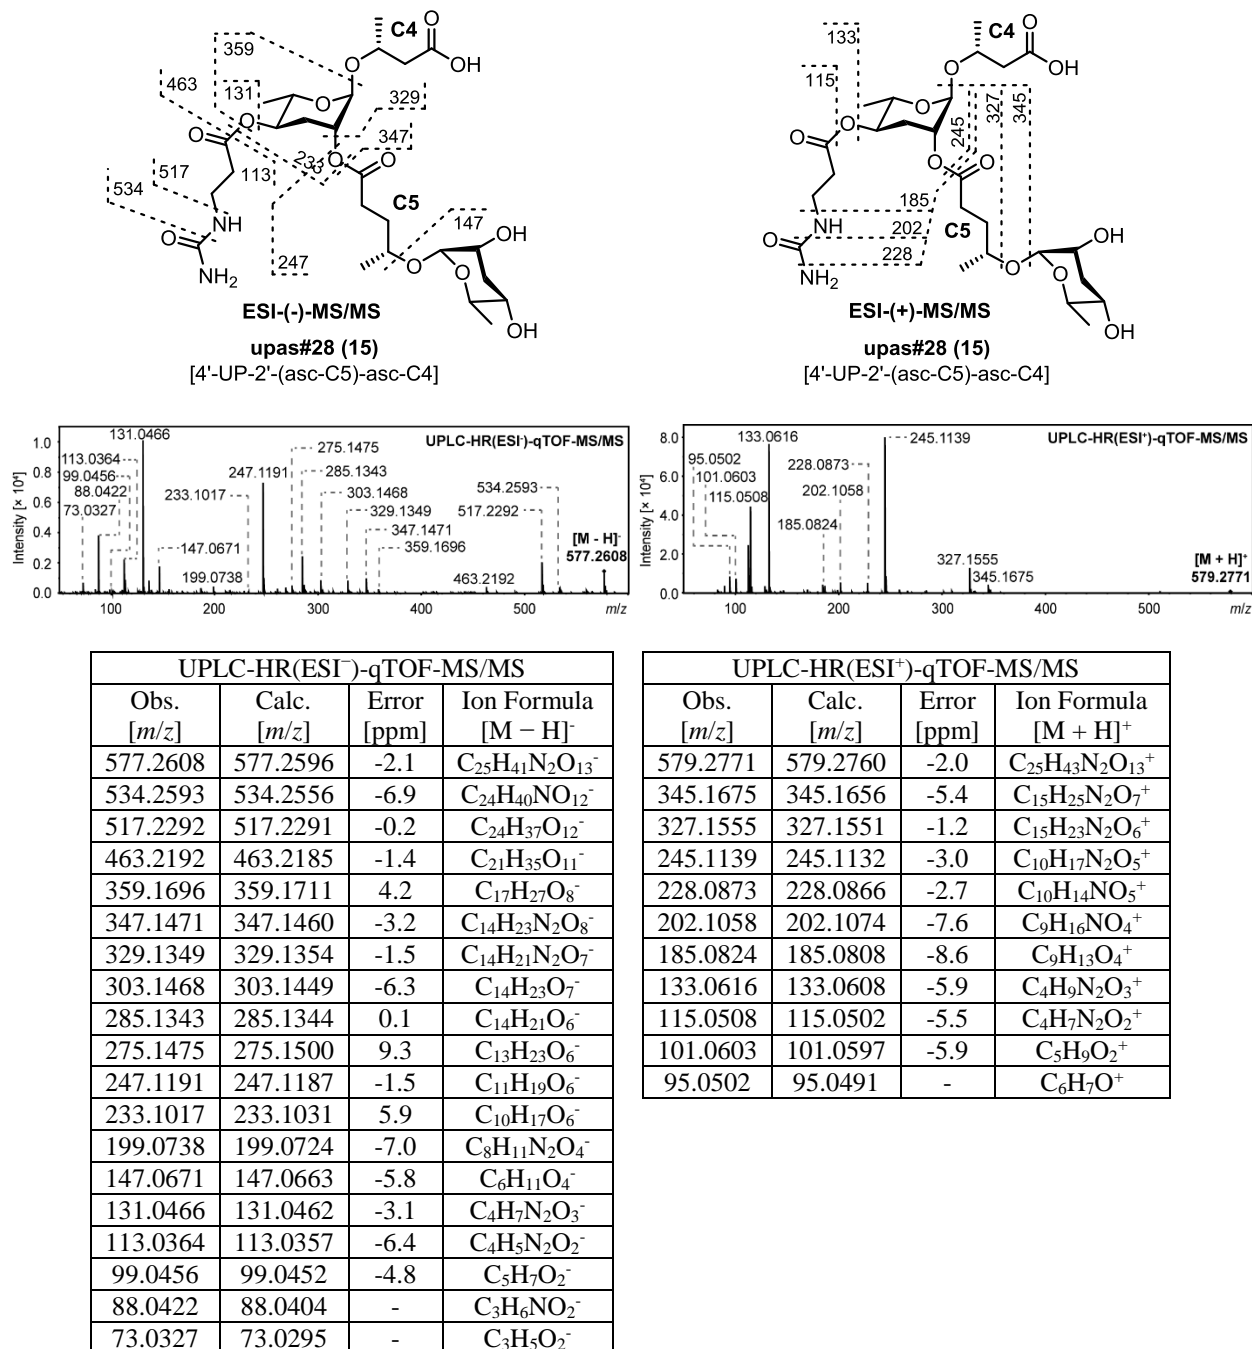

**Figure 5.** UPLC-HR(ESI<sup>-/+</sup>)-qTOF-MS/MS mass spectral data of upas#28 [4'-UP-2'-(asc-C5)-asc-C4, **15**] in both negative and positive ion modes. Observation of the fragment ion signal for C<sub>4</sub>H<sub>7</sub>N<sub>2</sub>O<sub>3</sub><sup>-</sup> ( $m/z$  131.0466 [M - H]<sup>-</sup>) indicated the presence of a ureidopropionic acid group in upas#28 [4'-UP-2'-(asc-C5)-asc-C4, **15**]. Observation of two other ion signals of C<sub>15</sub>H<sub>23</sub>N<sub>2</sub>O<sub>6</sub><sup>-</sup> ( $m/z$  327.1555 [M + H]<sup>+</sup>) and C<sub>15</sub>H<sub>25</sub>N<sub>2</sub>O<sub>7</sub><sup>-</sup> ( $m/z$  345.1675 [M + H]<sup>+</sup>) indicated that the first ascaroside in upas#28 [4'-UP-2'-(asc-C5)-asc-C4, **15**] should carry a C5 side chain.

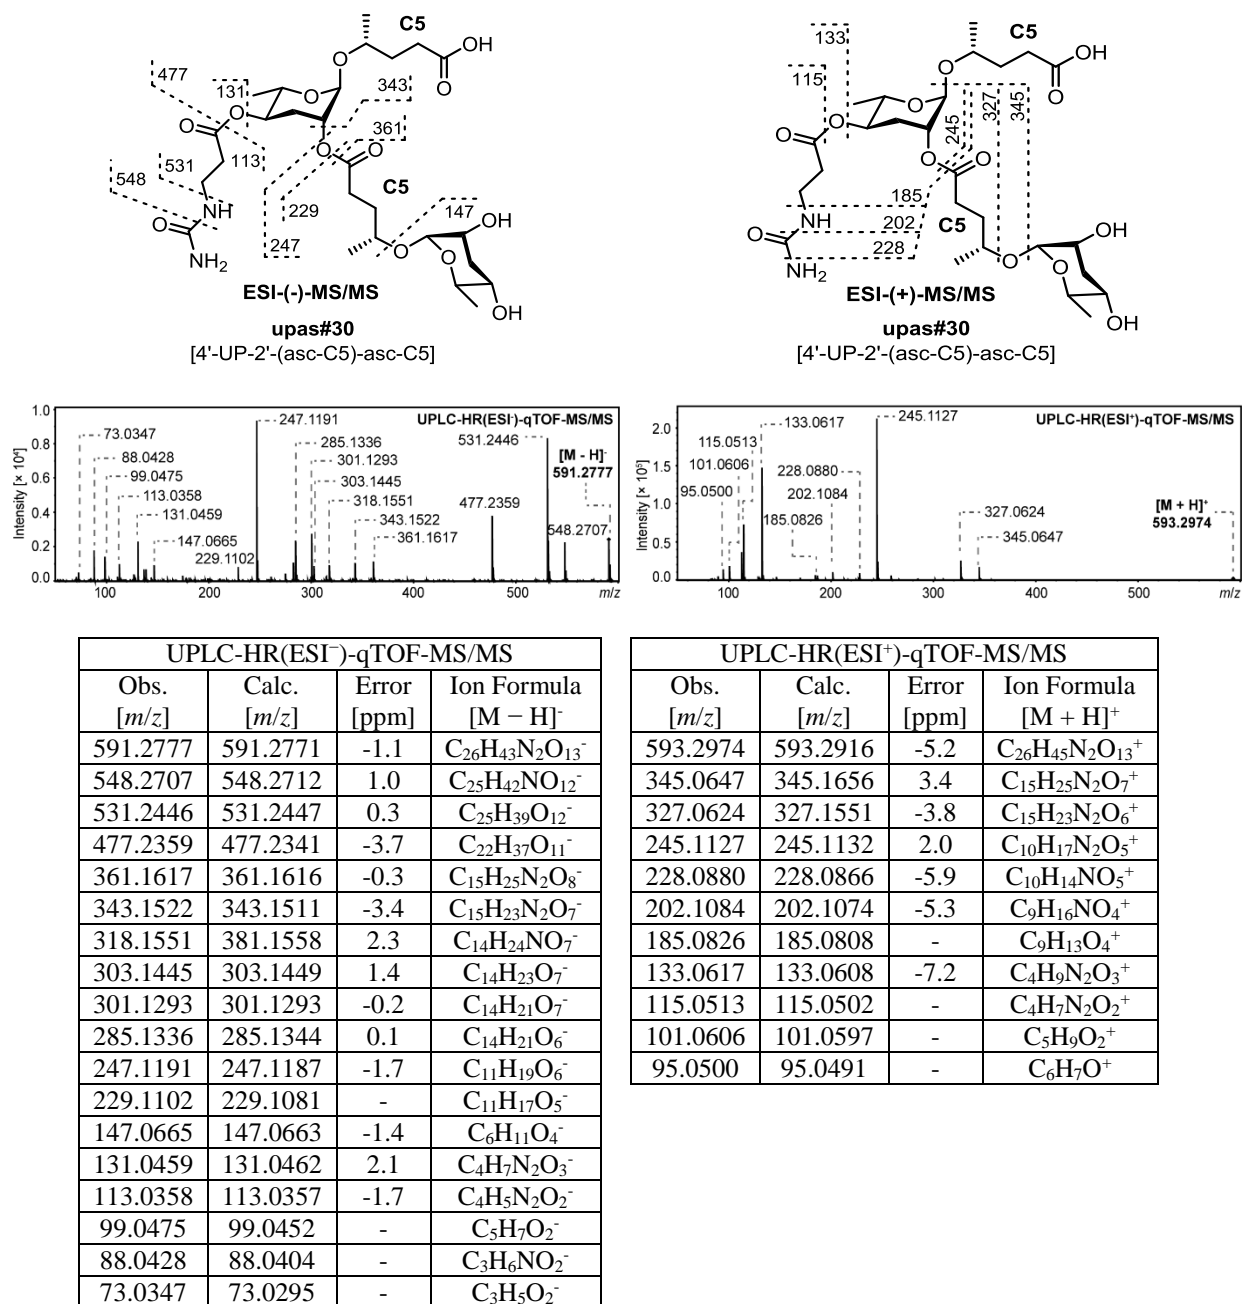

**Figure 6.** UPLC-HR(ESI<sup>+/+</sup>)-qTOF-MS/MS mass spectral data of upas#30 [4'-UP-2'-(asc-C5)-asc-C5] in both negative and positive ion modes.

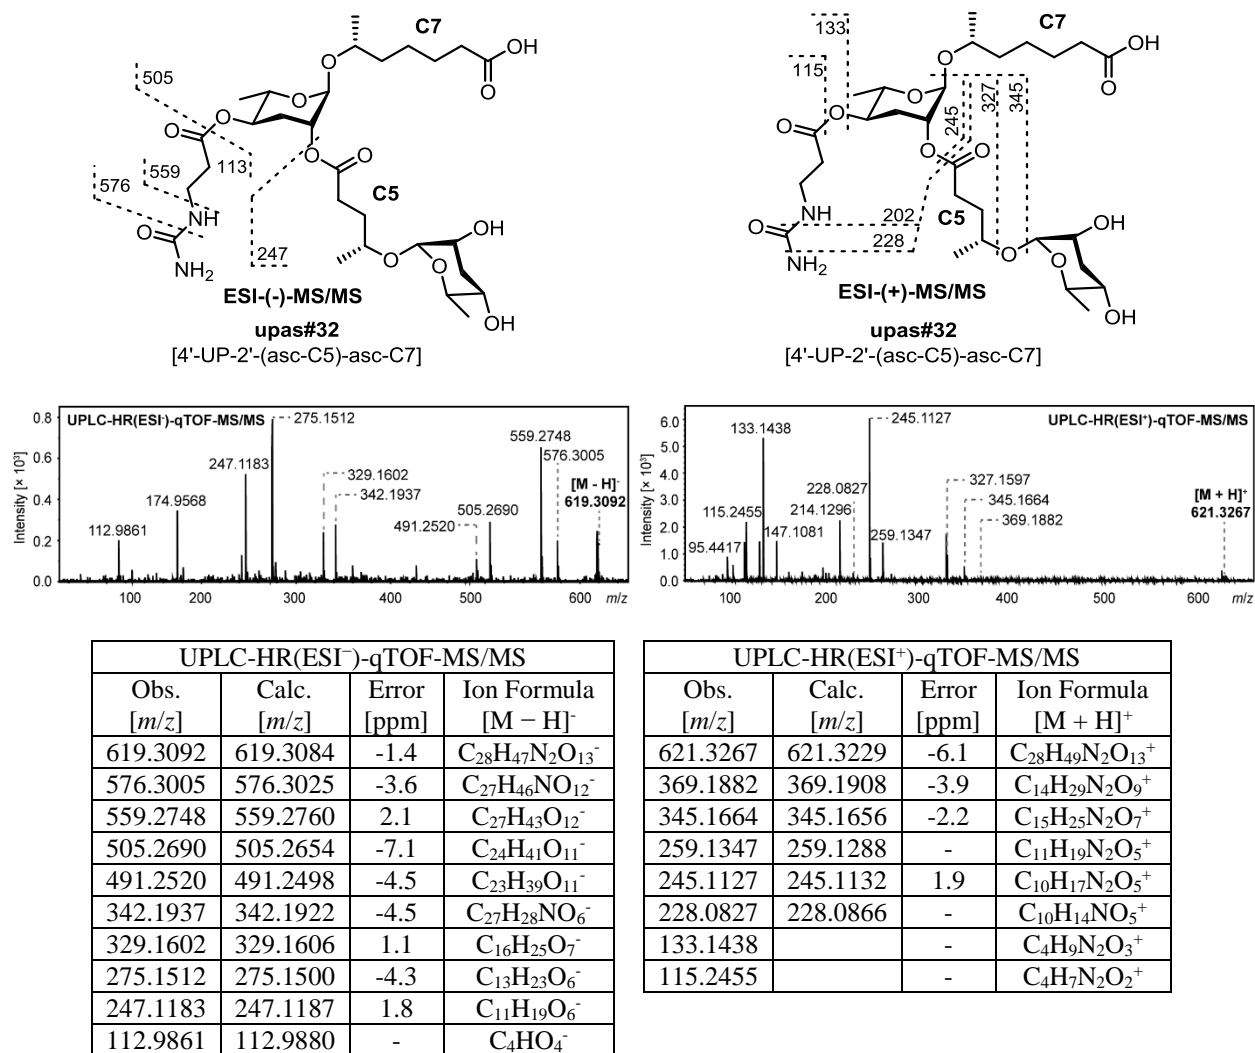

**Figure 7.** UPLC-HR(ESI<sup>±</sup>)-qTOF-MS/MS mass spectral data of upas#32 [4'-UP-2'-(asc-C5)-asc-C7] in both negative and positive ion modes.

## References

- Bose N**, Ogawa A, von Reuss SH, Yim JJ, Ragsdale EJ, Sommer RJ, Schroeder FC. 2012. Complex small-molecule architectures regulate phenotypic plasticity in a nematode. *Angewandte Chemie International Edition* **52**:12438-12443. DOI: [https://doi.org/ 10.1002/anie.201206797](https://doi.org/10.1002/anie.201206797)
- Falcke JM**, Bose N, Artyukhin AB, Rödelberger C, Markov GV, Yim JJ, Grimm D, Claassen MH, Panda O, Baccile JA, Zhang Y, Le HH, Jolic D, Schroeder FC, Sommer RJ. 2018. Linking genomic and metabolomic natural variation uncovers nematode pheromone biosynthesis. *Cell Chemical Biology* **25**:1-10. DOI: <https://doi.org/10.1016/j.chembiol.2018.04.004>
- von Reuss SH**, Bose N, Srinivasan J, Yim JJ, Judkins JC, Sternberg PW, Schroeder FC. 2012. Comparative metabolomics reveals biogenesis of ascarosides, a modular library of small-molecule signals in *C. elegans*. *Journal of the American Chemical Society* **134**:1817-1824. DOI: <https://doi.org/10.1021/ja210202y>
