# Supplementary material for: Convergent evolution of small molecule pheromones in Pristionchus nematodes
Source: eLife journal article supplement (doi:10.7554/elife.55687), 2020-04-27
Supplement: supp [file elife-55687-supp-v1.zip › elife_poa_e55687_Supplementary_file_3.pdf]

|                                                                                                                         |       |
|-------------------------------------------------------------------------------------------------------------------------|-------|
| <b>supplementary file 3: NDMMs detected from <i>Pristionchus</i> species and NMR data of isolated or enriched NDMMs</b> | Pages |
| <b>Table 1.</b> Known NDMMs detected from <i>Pristionchus</i> nematodes.                                                | S2    |
| <b>Table 2.</b> Novel DASC chemicals detected from <i>Pristionchus</i> nematodes.                                       | S3    |
| <b>Table 3.</b> Novel UBAS chemicals detected from <i>Pristionchus</i> nematodes.                                       | S4    |
| <b>Table 4.</b> Novel UPAS chemicals detected from <i>Pristionchus</i> nematodes.                                       | S5    |
| <b>Table 5.</b> Producers of unquantifiable novel chemicals.                                                            | S6    |
| <b>Table 6.</b> Procedures of isolating target ascarosides from <i>exo</i> -metabolomes.                                | S8    |
| <b>Table 7.</b> NMR spectroscopic data of isolated dasc#3 ( <b>1</b> ) from <i>P. fukushimae</i> .                      | S9    |
| <b>Table 8.</b> NMR spectroscopic data of isolated dasc#4 ( <b>2</b> ) from <i>P. taiwanensis</i> .                     | S10   |
| <b>Table 9.</b> NMR spectroscopic data of isolated dasc#5 ( <b>3</b> ) from <i>D. magnus</i> .                          | S11   |
| <b>Table 10.</b> NMR spectroscopic data of isolated dasc#6 ( <b>4</b> ) from <i>P. entomophagus</i> .                   | S12   |
| <b>Table 11.</b> NMR spectroscopic data of isolated dasc#10 ( <b>5</b> ) from <i>P. mayeri</i> .                        | S13   |
| <b>Table 12.</b> NMR spectroscopic data of isolated dasc#14 ( <b>6</b> ) from <i>P. entomophagus</i> .                  | S14   |
| <b>Table 13.</b> NMR spectroscopic data of isolated dasc#17 ( <b>8</b> ) from <i>P. uniformis</i> .                     | S15   |
| <b>Table 14.</b> NMR spectroscopic data of isolated paso#9 from <i>P. pacificus</i> .                                   | S16   |
| <b>Table 15.</b> NMR spectroscopic data of isolated ubas#30 ( <b>9</b> ) from <i>P. maxplancki</i> .                    | S17   |
| <b>Table 16.</b> NMR spectroscopic data of isolated ubas#34 ( <b>11</b> ) from <i>P. quartusdecimus</i> .               | S18   |
| <b>Table 17.</b> NMR spectroscopic data of isolated ubas#35 ( <b>12</b> ) from <i>P. quartusdecimus</i> .               | S19   |
| <b>Table 18.</b> NMR spectroscopic data of isolated ubas#28 ( <b>13</b> ) from <i>P. fukushimae</i> .                   | S20   |
| <b>Table 19.</b> NMR spectroscopic data of isolated upas#34 ( <b>14</b> ) from <i>P. quartusdecimus</i> .               | S21   |
| <b>Table 20.</b> NMR spectroscopic data of isolated upas#28 ( <b>15</b> ) from <i>P. fukushimae</i> .                   | S22   |
| <b>References</b>                                                                                                       | S23   |

**Table 1.** UPLC-HR(ESI<sup>−</sup>)-qTOF-MS detected known ascarosides and paratosides from the *exo*-metabolomes of *Pristionchus* nematodes.

| Name<br>[SMID] | Nomenclature                                         | RT<br>[min] | Obs.<br>[m/z] | Calc.<br>[m/z] | Error<br>[ppm] | Ion Formula<br>[M - H] <sup>−</sup>                                         | Families of<br>Chemicals |
|----------------|------------------------------------------------------|-------------|---------------|----------------|----------------|-----------------------------------------------------------------------------|--------------------------|
| ascr#5         | asc-ωC3 <sup>‡</sup>                                 | 14.08       | 219.0875      | 219.1874       | -0.2           | C <sub>9</sub> H <sub>15</sub> O <sub>6</sub> <sup>−</sup>                  | <b>Simple<br/>NDMM</b>   |
| ascr#11        | asc-C4                                               | 15.08       | 233.1029      | 233.1031       | 0.9            | C <sub>10</sub> H <sub>17</sub> O <sub>6</sub> <sup>−</sup>                 |                          |
| ascr#9         | asc-C5                                               | 16.02       | 247.1180      | 247.1187       | 3.1            | C <sub>11</sub> H <sub>19</sub> O <sub>6</sub> <sup>−</sup>                 |                          |
| ascr#12        | asc-C6                                               | 17.12       | 261.1332      | 261.1344       | 4.3            | C <sub>12</sub> H <sub>21</sub> O <sub>6</sub> <sup>−</sup>                 |                          |
| ascr#7         | asc-ΔC7                                              | 17.90       | 273.1346      | 273.1344       | -0.3           | C <sub>13</sub> H <sub>21</sub> O <sub>6</sub> <sup>−</sup>                 |                          |
| ascr#1         | asc-C7                                               | 18.28       | 275.1489      | 275.1500       | 4.2            | C <sub>13</sub> H <sub>23</sub> O <sub>6</sub> <sup>−</sup>                 |                          |
| ascr#14        | asc-C8                                               | 19.51       | 289.1657      | 289.1657       | 0.0            | C <sub>14</sub> H <sub>25</sub> O <sub>6</sub> <sup>−</sup>                 |                          |
| ascr#10        | asc-C9                                               | 20.80       | 303.1805      | 303.1813       | 2.7            | C <sub>15</sub> H <sub>27</sub> O <sub>6</sub> <sup>−</sup>                 |                          |
| ascr#18        | asc-C11                                              | 23.69       | 331.2119      | 331.2126       | 2.1            | C <sub>17</sub> H <sub>31</sub> O <sub>6</sub> <sup>−</sup>                 |                          |
| part#9         | par-C5                                               | 16.21       | 247.1181      | 247.1187       | 2.4            | C <sub>11</sub> H <sub>19</sub> O <sub>6</sub> <sup>−</sup>                 | <b>NPAR</b>              |
| npar#1         | -                                                    | 17.25       | 641.2431      | 641.2424       | -1.1           | C <sub>26</sub> H <sub>37</sub> N <sub>6</sub> O <sub>13</sub> <sup>−</sup> |                          |
| npar#2         | -                                                    | 17.96       | 509.2003      | 509.2002       | -0.3           | C <sub>21</sub> H <sub>29</sub> N <sub>6</sub> O <sub>9</sub> <sup>−</sup>  |                          |
| npar#3         | -                                                    | 17.87       | 525.1953      | 525.1951       | -0.5           | C <sub>21</sub> H <sub>29</sub> N <sub>6</sub> O <sub>10</sub> <sup>−</sup> | <b>PASC</b>              |
| pasc#9         | -                                                    | 20.42       | 466.2071      | 466.2083       | 2.5            | C <sub>23</sub> H <sub>32</sub> NO <sub>9</sub> <sup>−</sup>                |                          |
| pasc#12        | -                                                    | 21.00       | 480.2233      | 480.2239       | 1.2            | C <sub>24</sub> H <sub>34</sub> NO <sub>9</sub> <sup>−</sup>                |                          |
| pasc#1         | -                                                    | 21.68       | 494.2398      | 494.2396       | -0.4           | C <sub>25</sub> H <sub>36</sub> NO <sub>9</sub> <sup>−</sup>                |                          |
| pasa#9         | -                                                    | 23.55       | 585.2473      | 585.2454       | -3.4           | C <sub>30</sub> H <sub>37</sub> N <sub>2</sub> O <sub>10</sub> <sup>−</sup> |                          |
| paso#9         | -                                                    | 22.16       | 601.2405      | 601.2403       | -0.4           | C <sub>30</sub> H <sub>37</sub> N <sub>2</sub> O <sub>11</sub> <sup>−</sup> | <b>DASC</b>              |
| dasc#1         | 4'-(asc-C7 <sup>#</sup> )-asc-C7 <sup>#</sup>        | 22.55       | 533.2961      | 533.2967       | 1.2            | C <sub>26</sub> H <sub>45</sub> O <sub>11</sub> <sup>−</sup>                |                          |
| ubas#1         | 4'-UB-2'-(asc-ωC5 <sup>#</sup> )-asc-C5 <sup>#</sup> | 20.56       | 605.2926      | 605.2927       | 0.1            | C <sub>27</sub> H <sub>45</sub> N <sub>2</sub> O <sub>13</sub> <sup>−</sup> | <b>UBAS</b>              |
| ubas#2         | 4'-UB-2'-(asc-C6 <sup>#</sup> )-asc-C5 <sup>#</sup>  | 21.03       | 619.3092      | 619.3084       | -1.4           | C <sub>27</sub> H <sub>45</sub> N <sub>2</sub> O <sub>13</sub> <sup>−</sup> |                          |
| ubas#5         | 4'-UB-asc-C4                                         | 17.63       | 361.1612      | 361.1616       | 1.1            | C <sub>15</sub> H <sub>25</sub> N <sub>2</sub> O <sub>8</sub> <sup>−</sup>  |                          |
| ubas#3         | 4'-UB-asc-C5                                         | 18.32       | 375.1778      | 375.1773       | -1.3           | C <sub>16</sub> H <sub>27</sub> N <sub>2</sub> O <sub>8</sub> <sup>−</sup>  |                          |
| ubas#12        | 4'-UB-asc-C6                                         | 19.05       | 389.1928      | 389.1929       | 0.4            | C <sub>17</sub> H <sub>29</sub> N <sub>2</sub> O <sub>8</sub> <sup>−</sup>  |                          |
| ubas#4         | 4'-UB-asc-C7                                         | 20.06       | 403.2054      | 403.2086       | 7.8            | C <sub>18</sub> H <sub>31</sub> N <sub>2</sub> O <sub>8</sub> <sup>−</sup>  |                          |

<sup>‡</sup> indicates the fatty acid side chain (aglycone) length of an ascaroside.

<sup>#</sup> indicates the two fatty acid side chain lengths in DASC and UBAS chemicals. (Definition of the ascarosides units in DASC and UBAS chemicals is described in **Figure 4 – figure supplement 1A-B** and **Figure 5 – figure supplement 3C**).

**Table 2.** UPLC-HR(ESI<sup>+/−</sup>)-qTOF-MS detected the DASC family of novel ascarosides from the *exo*-metabolomes of *Pristionchus* nematodes.

| Name<br>[SMID] | Nomenclature                       | RT<br>[min] | Obs.<br>[m/z] | Calc.<br>[m/z] | Error<br>[ppm] | Ion Formula<br>[adducts assignments]                           |                       |
|----------------|------------------------------------|-------------|---------------|----------------|----------------|----------------------------------------------------------------|-----------------------|
| dasc#2         | 2'/4'-(asc-C4)-asc-C4 <sup>#</sup> | 18.30       | 449.2026      | 449.2028       | 0.6            | C <sub>20</sub> H <sub>33</sub> O <sub>11</sub> <sup>−</sup>   | [M - H] <sup>−</sup>  |
|                |                                    |             | 473.1976      | 473.1993       | 1.7            | C <sub>20</sub> H <sub>34</sub> NaO <sub>11</sub> <sup>+</sup> | [M + Na] <sup>+</sup> |
| dasc#3 (1)     | 2'-(asc-C5)-asc-C4                 | 18.91       | 463.2178      | 463.2185       | 1.4            | C <sub>21</sub> H <sub>35</sub> O <sub>11</sub> <sup>−</sup>   | [M - H] <sup>−</sup>  |
|                |                                    |             | 487.2137      | 487.2150       | 2.6            | C <sub>21</sub> H <sub>36</sub> NaO <sub>11</sub> <sup>+</sup> | [M + Na] <sup>+</sup> |
| dasc#4 (2)     | 2'-(asc-C5)-asc-C5                 | 19.48       | 477.2335      | 477.2341       | 1.3            | C <sub>22</sub> H <sub>37</sub> O <sub>11</sub> <sup>−</sup>   | [M - H] <sup>−</sup>  |
|                |                                    |             | 501.2307      | 501.2306       | 0.0            | C <sub>22</sub> H <sub>38</sub> NaO <sub>11</sub> <sup>+</sup> | [M + Na] <sup>+</sup> |
| dasc#5 (3)     | 4'-(asc-C5)-asc-C5                 | 19.35       | 477.2343      | 477.2341       | -0.3           | C <sub>22</sub> H <sub>37</sub> O <sub>11</sub> <sup>−</sup>   | [M - H] <sup>−</sup>  |
|                |                                    |             | 501.2327      | 501.2306       | -4.1           | C <sub>22</sub> H <sub>38</sub> NaO <sub>11</sub> <sup>+</sup> | [M + Na] <sup>+</sup> |
| dasc#6 (4)     | 2'-(asc-C6)-asc-C5                 | 20.16       | 491.2487      | 491.2498       | 2.3            | C <sub>23</sub> H <sub>39</sub> O <sub>11</sub> <sup>−</sup>   | [M - H] <sup>−</sup>  |
|                |                                    |             | 515.2474      | 515.2463       | -2.2           | C <sub>23</sub> H <sub>40</sub> NaO <sub>11</sub> <sup>+</sup> | [M + Na] <sup>+</sup> |
| dasc#7         | 2'/4'-(asc-C7)-asc-C4 <sup>#</sup> | 20.34       | 491.2499      | 491.2498       | -0.2           | C <sub>23</sub> H <sub>39</sub> O <sub>11</sub> <sup>−</sup>   | [M - H] <sup>−</sup>  |
|                |                                    |             | 515.2446      | 515.2463       | 3.3            | C <sub>23</sub> H <sub>40</sub> NaO <sub>11</sub> <sup>+</sup> | [M + Na] <sup>+</sup> |
| dasc#8         | 2'/4'-(asc-C6)-asc-C6 <sup>#</sup> | 20.75       | 505.2652      | 505.2654       | 0.4            | C <sub>24</sub> H <sub>41</sub> O <sub>11</sub> <sup>−</sup>   | [M - H] <sup>−</sup>  |
|                |                                    |             | 529.2639      | 529.2619       | -3.8           | C <sub>24</sub> H <sub>42</sub> NaO <sub>11</sub> <sup>+</sup> | [M + Na] <sup>+</sup> |
| dasc#9         | 2'-(asc-C7)-asc-C5 <sup>†</sup>    | 20.95       | 505.2662      | 505.2654       | -1.5           | C <sub>24</sub> H <sub>41</sub> O <sub>11</sub> <sup>−</sup>   | [M - H] <sup>−</sup>  |
|                |                                    |             | 529.2625      | 529.2619       | -1.0           | C <sub>24</sub> H <sub>42</sub> NaO <sub>11</sub> <sup>+</sup> | [M + Na] <sup>+</sup> |
| dasc#10 (5)    | 4'-(asc-C5)-asc-C7                 | 21.05       | 505.2659      | 505.2654       | -0.9           | C <sub>24</sub> H <sub>41</sub> O <sub>11</sub> <sup>−</sup>   | [M - H] <sup>−</sup>  |
|                |                                    |             | 529.2651      | 529.2619       | 6.0            | C <sub>24</sub> H <sub>42</sub> NaO <sub>11</sub> <sup>+</sup> | [M + Na] <sup>+</sup> |
| dasc#11        | 2'/4'-(asc-C7)-asc-C6 <sup>#</sup> | 21.60       | 519.2801      | 519.2811       | 1.9            | C <sub>25</sub> H <sub>43</sub> O <sub>11</sub> <sup>−</sup>   | [M - H] <sup>−</sup>  |
|                |                                    |             | 543.2766      | 543.2776       | 1.7            | C <sub>25</sub> H <sub>44</sub> NaO <sub>11</sub> <sup>+</sup> | [M + Na] <sup>+</sup> |
| dasc#12        | 4'-(asc-C6)-asc-C7 <sup>†</sup>    | 21.54       | 519.2825      | 519.2811       | -2.8           | C <sub>25</sub> H <sub>43</sub> O <sub>11</sub> <sup>−</sup>   | [M - H] <sup>−</sup>  |
|                |                                    |             | 543.2798      | 543.2776       | -4.1           | C <sub>25</sub> H <sub>44</sub> NaO <sub>11</sub> <sup>+</sup> | [M + Na] <sup>+</sup> |
| dasc#13        | 2'/4'-(asc-C5)-asc-C9 <sup>#</sup> | 23.17       | 533.2961      | 533.2967       | 1.3            | C <sub>26</sub> H <sub>45</sub> O <sub>11</sub> <sup>−</sup>   | [M - H] <sup>−</sup>  |
|                |                                    |             | 557.2925      | 557.2932       | 1.4            | C <sub>26</sub> H <sub>46</sub> NaO <sub>11</sub> <sup>+</sup> | [M + Na] <sup>+</sup> |
| dasc#14 (6)    | 4'-(asc-ΔC7)-asc-C5                | 20.55       | 503.2492      | 503.2498       | 0.6            | C <sub>24</sub> H <sub>39</sub> O <sub>11</sub> <sup>−</sup>   | [M - H] <sup>−</sup>  |
|                |                                    |             | 522.2938      | 522.2909       | -5.5           | C <sub>24</sub> H <sub>44</sub> NaO <sub>11</sub> <sup>+</sup> | [M + Na] <sup>+</sup> |
| dasc#15        | 4'-(asc-ΔC7)-asc-C6 <sup>†</sup>   | 21.26       | 517.2662      | 517.2654       | -0.8           | C <sub>25</sub> H <sub>41</sub> O <sub>11</sub> <sup>−</sup>   | [M - H] <sup>−</sup>  |
|                |                                    |             | 541.2632      | 541.2619       | -2.3           | C <sub>25</sub> H <sub>42</sub> NaO <sub>11</sub> <sup>+</sup> | [M + Na] <sup>+</sup> |
| dasc#16 (7)    | 4'-(asc-ΔC7)-asc-C7                | 22.10       | 531.2815      | 531.2811       | -0.4           | C <sub>26</sub> H <sub>43</sub> O <sub>11</sub> <sup>−</sup>   | [M - H] <sup>−</sup>  |
|                |                                    |             | 550.3216      | 550.3222       | 1.0            | C <sub>26</sub> H <sub>48</sub> NaO <sub>11</sub> <sup>+</sup> | [M + Na] <sup>+</sup> |
| dasc#17 (8)    | 4'-(asc-ΔC7)-asc-ΔC7               | 21.90       | 529.2652      | 529.2654       | 0.2            | C <sub>26</sub> H <sub>41</sub> O <sub>11</sub> <sup>−</sup>   | [M - H] <sup>−</sup>  |
|                |                                    |             | 553.2648      | 552.2619       | -5.2           | C <sub>26</sub> H <sub>42</sub> NaO <sub>11</sub> <sup>+</sup> | [M + Na] <sup>+</sup> |

<sup>†</sup> indicates DASCs where linkage position assignment is tentative: linkage is likely at the 2'-position for dasc#9, and at the 4'-position for dasc#12 and dasc#15.

<sup>#</sup> indicates DASCs where linkage position (2'- or 4'-position) has not been characterized.

**Table 3.** UPLC-HR(ESI<sup>+/−</sup>)-qTOF-MS detected the UBAS family of novel ascarosides from the *exo*-metabolomes of *Pristionchus* nematodes.

| Name<br>[SMID] | Nomenclature              | RT<br>[min] | Obs.<br>[m/z] | Calc.<br>[m/z] | Error<br>[ppm] | Ion Formula<br>[adducts assignments]                                        |                      |
|----------------|---------------------------|-------------|---------------|----------------|----------------|-----------------------------------------------------------------------------|----------------------|
| ubas#26        | 4'-UB-asc-ωC3             | 16.77       | 347.1458      | 347.1460       | 0.6            | C <sub>14</sub> H <sub>23</sub> N <sub>2</sub> O <sub>8</sub> <sup>−</sup>  | [M - H] <sup>−</sup> |
|                |                           |             | 349.1626      | 349.1605       | -5.8           | C <sub>14</sub> H <sub>25</sub> N <sub>2</sub> O <sub>8</sub> <sup>+</sup>  | [M + H] <sup>+</sup> |
| ubas#27        | 4'-UB-2'-(asc-C5)-asc-ωC3 | 19.27       | 577.2622      | 577.2614       | -1.3           | C <sub>25</sub> H <sub>41</sub> N <sub>2</sub> O <sub>13</sub> <sup>−</sup> | [M - H] <sup>−</sup> |
|                |                           |             | 579.2778      | 579.2760       | -3.1           | C <sub>25</sub> H <sub>43</sub> N <sub>2</sub> O <sub>13</sub> <sup>+</sup> | [M + H] <sup>+</sup> |
| ubas#28 (13)   | 4'-UB-2'-(asc-C5)-asc-C4  | 20.18       | 591.2781      | 591.2771       | -1.7           | C <sub>26</sub> H <sub>43</sub> N <sub>2</sub> O <sub>13</sub> <sup>−</sup> | [M - H] <sup>−</sup> |
|                |                           |             | 593.2916      | 593.1916       | 0.1            | C <sub>26</sub> H <sub>45</sub> N <sub>2</sub> O <sub>13</sub> <sup>+</sup> | [M + H] <sup>+</sup> |
| ubas#29        | 4'-UB-2'-(asc-C6)-asc-C4  | 20.63       | 605.2952      | 605.2927       | -4.1           | C <sub>27</sub> H <sub>45</sub> N <sub>2</sub> O <sub>13</sub> <sup>−</sup> | [M - H] <sup>−</sup> |
|                |                           |             | 607.3068      | 607.3073       | 0.8            | C <sub>27</sub> H <sub>47</sub> N <sub>2</sub> O <sub>13</sub> <sup>+</sup> | [M + H] <sup>+</sup> |
| ubas#30 (9)    | 4'-UB-2'-(asc-C5)-asc-C5  | 20.52       | 605.2954      | 605.2927       | -4.5           | C <sub>27</sub> H <sub>45</sub> N <sub>2</sub> O <sub>13</sub> <sup>−</sup> | [M - H] <sup>−</sup> |
|                |                           |             | 607.3084      | 607.3073       | -1.9           | C <sub>27</sub> H <sub>47</sub> N <sub>2</sub> O <sub>13</sub> <sup>+</sup> | [M + H] <sup>+</sup> |
| ubas#31        | 4'-UB-2'-(asc-C6)-asc-C6  | 21.66       | 633.3261      | 633.3240       | -3.4           | C <sub>29</sub> H <sub>49</sub> N <sub>2</sub> O <sub>13</sub> <sup>−</sup> | [M - H] <sup>−</sup> |
|                |                           |             | 635.3382      | 635.3386       | 0.4            | C <sub>29</sub> H <sub>51</sub> N <sub>2</sub> O <sub>13</sub> <sup>+</sup> | [M + H] <sup>+</sup> |
| ubas#32 (10)   | 4'-UB-2'-(asc-C5)-asc-C7  | 21.99       | 633.3248      | 633.3240       | -1.3           | C <sub>29</sub> H <sub>49</sub> N <sub>2</sub> O <sub>13</sub> <sup>−</sup> | [M - H] <sup>−</sup> |
|                |                           |             | 635.3365      | 635.3386       | 2.1            | C <sub>29</sub> H <sub>51</sub> N <sub>2</sub> O <sub>13</sub> <sup>+</sup> | [M + H] <sup>+</sup> |
| ubas#33        | 4'-UB-2'-(asc-ωC3)-asc-C4 | 19.05       | 563.2459      | 563.2458       | -0.3           | C <sub>24</sub> H <sub>39</sub> N <sub>2</sub> O <sub>13</sub> <sup>−</sup> | [M - H] <sup>−</sup> |
|                |                           |             | 565.2674      | 565.2603       | 5.1            | C <sub>24</sub> H <sub>41</sub> N <sub>2</sub> O <sub>13</sub> <sup>+</sup> | [M + H] <sup>+</sup> |
| ubas#34 (11)   | 4'-UB-2'-(asc-C4)-asc-C4  | 19.57       | 577.2607      | 577.2614       | 1.2            | C <sub>25</sub> H <sub>41</sub> N <sub>2</sub> O <sub>13</sub> <sup>−</sup> | [M - H] <sup>−</sup> |
|                |                           |             | 579.2767      | 579.2760       | -1.2           | C <sub>25</sub> H <sub>43</sub> N <sub>2</sub> O <sub>13</sub> <sup>+</sup> | [M + H] <sup>+</sup> |
| ubas#35 (12)   | 4'-UB-2'-(asc-C4)-asc-C5  | 19.96       | 591.2786      | 591.2771       | -2.5           | C <sub>26</sub> H <sub>43</sub> N <sub>2</sub> O <sub>13</sub> <sup>−</sup> | [M - H] <sup>−</sup> |
|                |                           |             | 593.2925      | 593.2916       | -1.4           | C <sub>26</sub> H <sub>45</sub> N <sub>2</sub> O <sub>13</sub> <sup>+</sup> | [M + H] <sup>+</sup> |
| ubas#36        | 4'-UB-2'-(asc-C4)-asc-C6  | 20.48       | 605.2934      | 605.2927       | -1.2           | C <sub>27</sub> H <sub>45</sub> N <sub>2</sub> O <sub>13</sub> <sup>−</sup> | [M - H] <sup>−</sup> |
|                |                           |             | 607.3091      | 607.3073       | -3.0           | C <sub>27</sub> H <sub>47</sub> N <sub>2</sub> O <sub>13</sub> <sup>+</sup> | [M + H] <sup>+</sup> |
| ubas#37        | 4'-UB-2'-(asc-C4)-asc-C7  | 21.35       | 619.3103      | 619.3084       | -3.1           | C <sub>28</sub> H <sub>47</sub> N <sub>2</sub> O <sub>13</sub> <sup>−</sup> | [M - H] <sup>−</sup> |
|                |                           |             | 621.3243      | 621.3229       | -2.2           | C <sub>28</sub> H <sub>49</sub> N <sub>2</sub> O <sub>13</sub> <sup>+</sup> | [M + H] <sup>+</sup> |

**Table 4.** UPLC-HR(ESI<sup>+/−</sup>)-qTOF-MS detected the UPAS family of novel ascarosides from the *exo*-metabolomes of *Pristionchus* nematodes.

| Name<br>[SMID] | Nomenclature             | RT<br>[min] | Obs.<br>[m/z] | Calc.<br>[m/z] | Error<br>[ppm] | Ion Formula<br>[adducts assignments]                                        |                      |
|----------------|--------------------------|-------------|---------------|----------------|----------------|-----------------------------------------------------------------------------|----------------------|
| upas#5         | 4'-UP-asc-C4             | 16.63       | 347.1464      | 347.1460       | -1.1           | C <sub>14</sub> H <sub>23</sub> N <sub>2</sub> O <sub>8</sub> <sup>−</sup>  | [M - H] <sup>−</sup> |
|                |                          |             | 349.1640      | 349.1605       | -9.8           | C <sub>14</sub> H <sub>25</sub> N <sub>2</sub> O <sub>8</sub> <sup>+</sup>  | [M + H] <sup>+</sup> |
| upas#3         | 4'-UP-asc-C5             | 17.47       | 361.1615      | 361.1616       | 0.3            | C <sub>15</sub> H <sub>25</sub> N <sub>2</sub> O <sub>8</sub> <sup>−</sup>  | [M - H] <sup>−</sup> |
|                |                          |             | 363.1773      | 363.1762       | -3.1           | C <sub>15</sub> H <sub>27</sub> N <sub>2</sub> O <sub>8</sub> <sup>+</sup>  | [M + H] <sup>+</sup> |
| upas#4         | 4'-UP-asc-C7             | 19.34       | 389.1935      | 389.1929       | -1.4           | C <sub>17</sub> H <sub>29</sub> N <sub>2</sub> O <sub>8</sub> <sup>−</sup>  | [M - H] <sup>−</sup> |
|                |                          |             | 391.2070      | 391.2075       | 1.2            | C <sub>17</sub> H <sub>31</sub> N <sub>2</sub> O <sub>8</sub> <sup>+</sup>  | [M + H] <sup>+</sup> |
| upas#34 (14)   | 4'-UP-2'-(asc-C4)-asc-C4 | 18.83       | 563.2459      | 563.2458       | -0.3           | C <sub>24</sub> H <sub>39</sub> N <sub>2</sub> O <sub>13</sub> <sup>−</sup> | [M - H] <sup>−</sup> |
|                |                          |             | 565.2628      | 565.2603       | -4.3           | C <sub>24</sub> H <sub>41</sub> N <sub>2</sub> O <sub>13</sub> <sup>+</sup> | [M + H] <sup>+</sup> |
| upas#28 (15)   | 4'-UP-2'-(asc-C5)-asc-C4 | 19.53       | 577.2608      | 577.2596       | -2.1           | C <sub>25</sub> H <sub>41</sub> N <sub>2</sub> O <sub>13</sub> <sup>−</sup> | [M - H] <sup>−</sup> |
|                |                          |             | 579.2771      | 579.2760       | -2.0           | C <sub>25</sub> H <sub>43</sub> N <sub>2</sub> O <sub>13</sub> <sup>+</sup> | [M + H] <sup>+</sup> |
| upas#30        | 4'-UP-2'-(asc-C5)-asc-C5 | 19.92       | 591.2777      | 591.2771       | -1.1           | C <sub>26</sub> H <sub>43</sub> N <sub>2</sub> O <sub>13</sub> <sup>−</sup> | [M - H] <sup>−</sup> |
|                |                          |             | 593.2974      | 593.2916       | -5.2           | C <sub>26</sub> H <sub>45</sub> N <sub>2</sub> O <sub>13</sub> <sup>+</sup> | [M + H] <sup>+</sup> |
| upas#32        | 4'-UP-2'-(asc-C5)-asc-C7 | 21.54       | 619.3092      | 619.3084       | -1.4           | C <sub>28</sub> H <sub>47</sub> N <sub>2</sub> O <sub>13</sub> <sup>−</sup> | [M - H] <sup>−</sup> |
|                |                          |             | 621.3267      | 621.3229       | -6.1           | C <sub>28</sub> H <sub>49</sub> N <sub>2</sub> O <sub>13</sub> <sup>+</sup> | [M + H] <sup>+</sup> |

**Table 5.** Several detected chemicals were not quantified and included in **Figure 2** in the main text due to their very low ion abundance. Thus, their relevant producers were described here. UPAS chemicals were also convergently distributed in both *pacificus*- and *triformis*-clades.

| Name [SMID]  | Nomenclature             | Nematode (Producer)                                                       |
|--------------|--------------------------|---------------------------------------------------------------------------|
| ascr#18      | asc-C11                  | <i>P. atlanticus</i>                                                      |
| dasc#2       | 2'/4'-(asc-C4)-asc-C4    | <i>P. quartusdecimus</i> and <i>P. fukushimae</i>                         |
| dasc#7       | 2'/4'-(asc-C7)-asc-C4    | <i>P. triformis</i>                                                       |
| dasc#8       | 2'/4'-(asc-C6)-asc-C6    | <i>P. triformis</i>                                                       |
| dasc#11      | 2'/4'-(asc-C7)-asc-C6    | <i>P. triformis</i>                                                       |
| dasc#13      | 2'/4'-(asc-C5)-asc-C9    | <i>P. maxplancki</i>                                                      |
| ubas#31      | 4'-UB-2'-(asc-C6)-asc-C6 | <i>P. maxplancki</i>                                                      |
| ubas#37      | 4'-UB-2'-(asc-C4)-asc-C7 | <i>P. quartusdecimus</i>                                                  |
| upas#5       | 4'-UP-asc-C4             | <i>P. triformis</i> ( <i>triformis</i> -clade)                            |
| upas#3       | 4'-UP-asc-C5             | <i>P. maxplancki</i> ( <i>pacificus</i> -clade)                           |
| upas#4       | 4'-UP-asc-C7             | <i>P. maxplancki</i> ( <i>pacificus</i> -clade)                           |
| upas#34 (14) | 4'-UP-2'-(asc-C4)-asc-C4 | <i>P. quartusdecimus</i> ( <i>pacificus</i> -clade)                       |
| upas#28 (15) | 4'-UP-2'-(asc-C5)-asc-C4 | <i>P. fukushimae</i> ( <i>triformis</i> -clade)                           |
| upas#30      | 4'-UP-2'-(asc-C5)-asc-C5 | <i>P. laevicollis</i> and <i>P. maxplancki</i> ( <i>pacificus</i> -clade) |
| upas#32      | 4'-UP-2'-(asc-C5)-asc-C7 | <i>P. maxplancki</i> ( <i>pacificus</i> -clade)                           |

**Table 6a. Procedures for isolating target ascarosides from *exo*-metabolomes.** Major components of simple and modular ascarosides were initially fractionated by reverse phase C18 solid phase extraction (SPE), and further purified or enriched using semi-preparative HPLC. Purified or partially isolated materials were subjected for NMR measurements. For example, SPE60/B12 indicates that the target compound was fractionated using a solvent mixture of 60% MeOH and 40% water, which was further purified by semi-preparative HPLC, and finally enriched in B12 fraction that was dried for NMR data acquisitions.

| ASCR<br>Nematodes        | ascr#9       | ascr#1      | ascr#7       | ascr#10      | dasc#3<br>(1) | dasc#4<br>(2) | dasc#5<br>(3) | dasc#6<br>(4) | dasc#10<br>(5) | dasc#14<br>(6) | dasc#16<br>(7) | dasc#17<br>(8) |
|--------------------------|--------------|-------------|--------------|--------------|---------------|---------------|---------------|---------------|----------------|----------------|----------------|----------------|
| <i>P. pacificus</i>      |              |             |              |              |               | SPE50<br>B8   |               |               |                |                |                |                |
| <i>P. taiwanensis</i>    |              |             |              | SPE50<br>B17 |               | SPE50<br>B8   |               |               |                |                |                |                |
| <i>P. laevis</i>         |              |             |              |              |               |               |               |               |                |                |                |                |
| <i>P. maxplancki</i>     |              |             |              |              |               |               |               |               |                |                |                |                |
| <i>P. quartusdecimus</i> |              |             |              |              |               |               |               |               |                |                |                |                |
| <i>P. mayeri</i>         |              |             |              |              |               |               | SPE50<br>B8   |               | SPE60<br>B16   |                |                |                |
| <i>P. bulgaricus</i>     |              |             |              |              |               |               |               |               |                |                | SPE70<br>B22   |                |
| <i>P. uniformis</i>      |              |             | SPE30<br>A88 |              |               |               |               |               |                |                |                | SPE70<br>B20   |
| <i>P. entomophagus</i>   | SPE30<br>A77 |             |              |              |               | SPE50<br>B7   |               | SPE50<br>B11  |                | SPE60<br>B15   |                |                |
| <i>P. fukushimae</i>     |              |             |              |              | SPE50<br>B4   |               |               |               |                |                |                |                |
| <i>P. triiformis</i>     |              | SPE40<br>B2 |              |              |               |               |               |               |                |                |                |                |
| <i>D. magnus</i>         |              |             |              |              |               |               | SPE50<br>B7   |               |                |                |                |                |

**Table 6b. Procedures for isolating target ascarosides from *exo*-metabolomes.** Major components of modular ascarosides were initially fractionated by reverse phase C18 solid phase extraction (SPE) and further purified or enriched using semi-preparative HPLC. Purified or partially isolated materials were subjected for NMR measurements as described above.

| ASCR<br>Nematodes        | pasc#9       | paso#9       | ubas#30<br>(9) | ubas#1       | ubas#32<br>(10) | ubas#34<br>(11) | ubas#35<br>(12) | ubas#5       | ubas#28<br>(13) | upas#34<br>(14) | upas#28<br>(15) |
|--------------------------|--------------|--------------|----------------|--------------|-----------------|-----------------|-----------------|--------------|-----------------|-----------------|-----------------|
| <i>P. pacificus</i>      |              | SPE60<br>B22 |                | SPE60<br>B12 |                 |                 |                 |              |                 |                 |                 |
| <i>P. taiwanensis</i>    | SPE50<br>B12 |              |                | SPE60<br>B13 |                 |                 |                 |              |                 |                 |                 |
| <i>P. laevicollis</i>    |              |              |                | SPE60<br>B12 |                 |                 |                 |              |                 |                 |                 |
| <i>P. maxplancki</i>     |              |              | SPE60<br>B12   |              | SPE70<br>B20    |                 |                 |              |                 |                 |                 |
| <i>P. quartusdecimus</i> |              |              |                |              |                 | SPE50<br>B8     | SPE50<br>B11    |              |                 | SPE50<br>B3     |                 |
| <i>P. mayeri</i>         |              |              |                |              |                 |                 |                 |              |                 |                 |                 |
| <i>P. bulgaricus</i>     |              |              |                |              |                 |                 |                 |              |                 |                 |                 |
| <i>P. uniformis</i>      |              |              |                |              |                 |                 |                 |              |                 |                 |                 |
| <i>P. entomophagus</i>   |              |              |                |              |                 |                 |                 |              |                 |                 |                 |
| <i>P. fukushimae</i>     |              |              |                |              |                 |                 |                 |              | SPE60<br>B11    |                 | SPE60<br>B8     |
| <i>P. triformis</i>      |              |              |                |              |                 |                 |                 | SPE40<br>A87 |                 |                 |                 |
| <i>D. magnus</i>         |              |              |                |              |                 |                 |                 |              |                 |                 |                 |

**Table 7.**  $^1\text{H}$  (800 MHz) NMR spectroscopic data of natural **dasc#3** [2'-(asc-C5)-asc-C4, **1**] ( $\text{CD}_3\text{OD}$ ) isolated from the *exo*-metabolome of *P. fukushima*. Chemical shift was referenced to ( $\text{CD}_2\text{HOD}$ ) = 3.31 ppm. NMR data of dasc#3 [2'-(asc-C5)-asc-C4, **1**] are derived from NMR spectra in *supplementary file 1b* – *Figure 1*.

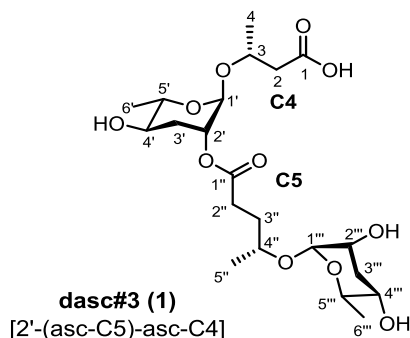

| Position | $\delta_{\text{H}}$ (mult., $J$ in Hz, intensity)                       |
|----------|-------------------------------------------------------------------------|
| 1        | -                                                                       |
| 2a       | 2.27 (dd, $J_{2a, 2b} = 14.5$ , $J_{2a, 3} = 6.8$ , 1H)                 |
| 2b       | 2.49 (dd, $J_{2b, 3} = 7.2$ , 1H)                                       |
| 3        | 4.25 (m, 1H)                                                            |
| 4        | 1.16 (d, $J_{3, 4} = 6.2$ , 3H)                                         |
| 1'       | 4.74 (s, 1H)                                                            |
| 2'       | 4.78 (s.br, 1H)                                                         |
| 3'ax     | 1.91 (ddd, $J_{2', 3'ax} = 3.3$ , $J_{3'ax, 3'eq} = 13.8$ , 1H)         |
| 3'eq     | 1.98 (ddd, $J_{2', 3'eq} = 5.0$ , 1H)                                   |
| 4'       | 3.34 (ddd, $J_{3'ax, 4'} = 11.0$ , $J_{3'eq, 4'} = 4.0$ , 1H)           |
| 5'       | 3.79 (dq, $J_{4', 5'} = 9.4$ , 1H)                                      |
| 6'       | 1.22 (d, $J_{5', 6'} = 6.2$ , 3H)                                       |
| 1''      | -                                                                       |
| 2''      | 2.50 (m, 2H)                                                            |
| 3''      | 1.82 (m, 2H)                                                            |
| 4''      | 3.85 (m, 1H)                                                            |
| 5''      | 1.14 (d, $J_{4'', 5''} = 6.1$ , 3H)                                     |
| 1'''     | 4.64 (s, 1H)                                                            |
| 2'''     | 3.71 (s.br, $J_{1''', 2'''} = 2.7$ , 1H)                                |
| 3'''ax   | 1.77 (ddd, $J_{2''', 3'''ax} = 3.2$ , $J_{3'''ax, 3'''eq} = 13.5$ , 1H) |
| 3'''eq   | 1.94 (ddd, $J_{2''', 3'''eq} = 5.1$ , 1H)                               |
| 4'''     | 3.50 (ddd, $J_{3'''ax, 4'''} = 11.0$ , $J_{3'''eq, 4'''} = 4.0$ , 1H)   |
| 5'''     | 3.63 (dq, $J_{4''', 5'''} = 9.8$ , 1H)                                  |
| 6'''     | 1.22 (d, $J_{5''', 6'''} = 6.2$ , 3H)                                   |

**Table 8.**  $^1\text{H}$  (800 MHz),  $^{13}\text{C}$  (200 MHz), HMBC and NOESY NMR spectroscopic data of natural **dasc#4** [2'-(asc-C5)-asc-C5, **2**] ( $\text{CD}_3\text{OD}$ ) isolated from the *exo*-metabolome of *P. taiwanensis*. **dasc#4** [2'-(asc-C5)-asc-C5, **2**] was also isolated from *P. entomophagus* and *P. pacificus*. Carbon shifts were determined from HSQC and HMBC spectra. Chemical shifts were referenced to  $(\text{CD}_2\text{HOD}) = 3.31$  ppm and  $(\text{CD}_3\text{OD}) = 49.0$  ppm. NMR data are derived from spectra in *supplementary file 1b – Figures 2-15*.

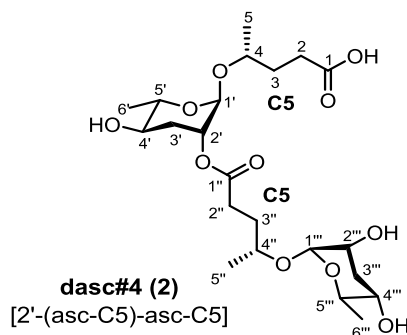

| Position | $\delta_{\text{C}}$ (ppm) | $\delta_{\text{H}}$ (mult., $J$ in Hz, intensity)                             | HMBC          | NOESY                    |
|----------|---------------------------|-------------------------------------------------------------------------------|---------------|--------------------------|
| 1        | 180.1                     | -                                                                             | -             | -                        |
| 2a       | 33.1                      | 2.33 ( <i>m</i> , 1H)                                                         | 1, 3, 4       | 2b, 3, 4, 5              |
| 2b       | 33.1                      | 2.38 ( <i>m</i> , 1H)                                                         | 1, 3, 4       | 2a, 3, 4, 5              |
| 3        | 34.1                      | 1.83 ( <i>m</i> , 2H)                                                         | 1, 2, 4, 5    | 1', 2a, 2b, 4, 5         |
| 4        | 72.1                      | 3.82 ( <i>m</i> , 1H)                                                         | 2, 1'         | 1', 3, 5                 |
| 5        | 18.7                      | 1.15 ( <i>d</i> , $J_{4,5} = 6.3$ , 3H)                                       | 3, 4          | 1', 3, 4                 |
| 1'       | 94.1                      | 4.72 ( <i>s</i> , 1H)                                                         | 2', 3'        | 2', 4, 5                 |
| 2'       | 72.6                      | 4.79 ( <i>s.br</i> , $J_{1',2'} = 2.1$ , 1H)                                  | 4', 1''       | 1', 3' ax, 3' eq         |
| 3'ax     | 33.1                      | 1.88 ( <i>ddd</i> , $J_{2',3'ax} = 3.1$ , $J_{3'ax,3'eq} = 13.6$ , 1H)        | 1', 2', 4'    | 2', 3' eq, 4', 5'        |
| 3'eq     | 33.1                      | 2.02 ( <i>ddd</i> , $J_{2',3'eq} = 4.8$ , 1H)                                 | 1', 2', 4'    | 2', 3' ax, 4'            |
| 4'       | 68.4                      | 3.40 ( <i>ddd</i> , $J_{3'ax,4'} = 11.1$ , $J_{3'eq,4'} = 4.0$ , 1H)          | -             | 3'ax, 3' eq, 6'          |
| 5'       | 70.8                      | 3.69 ( <i>dq</i> , $J_{4',5'} = 9.4$ , 1H)                                    | 4'            | 3'ax, 6'                 |
| 6'       | 17.9                      | 1.22 ( <i>d</i> , $J_{5',6'} = 6.2$ , 3H)                                     | 4', 5'        | 4', 5'                   |
| 1''      | 172.8                     | -                                                                             | -             | -                        |
| 2''      | 31.1                      | 2.50 ( <i>m</i> , 2H)                                                         | 1'', 3'', 4'' | 3'', 4'', 5''            |
| 3''      | 33.0                      | 1.84 ( <i>m</i> , 2H)                                                         | 4''           | 1''', 2'', 4'', 5''      |
| 4''      | 71.1                      | 3.85 ( <i>m</i> , 1H)                                                         | 2'', 1'''     | 1''', 3'', 5''           |
| 5''      | 18.8                      | 1.16 ( <i>d</i> , $J_{4'',5''} = 6.1$ , 3H)                                   | 3'', 4''      | 1''', 3'', 4''           |
| 1'''     | 97.1                      | 4.65 ( <i>s</i> , 1H)                                                         | 2''', 3'''    | 2''', 4'', 5''           |
| 2'''     | 69.6                      | 3.72 ( <i>s.br</i> , $J_{1'',2'''} = 2.5$ , 1H)                               | 4'''          | 1''', 3'''ax, 3'''eq     |
| 3'''ax   | 35.7                      | 1.76 ( <i>ddd</i> , $J_{2'',3'''ax} = 3.1$ , $J_{3'''ax,3'''eq} = 13.1$ , 1H) | 4'''          | 2''', 3'''eq, 4''', 5''' |
| 3'''eq   | 35.7                      | 1.96 ( <i>ddd</i> , $J_{2'',3'''eq} = 4.7$ , 1H)                              | 4'''          | 2''', 3'''ax, 4'''       |
| 4'''     | 68.0                      | 3.51 ( <i>ddd</i> , $J_{3'''ax,4'''} = 11.0$ , $J_{3'''eq,4'''} = 4.0$ , 1H)  | 5'''          | 3'''ax, 3'''eq, 6'''     |
| 5'''     | 71.1                      | 3.57 ( <i>dq</i> , $J_{4''',5'''} = 9.3$ , 1H)                                | 4'''          | 2''', 3'''ax, 6'''       |
| 6'''     | 17.7                      | 1.23 ( <i>d</i> , $J_{5''',6'''} = 6.2$ , 3H)                                 | 4''', 5'''    | 4''', 5'''               |

**Table 9.**  $^1\text{H}$  (800 MHz),  $^{13}\text{C}$  (200 MHz), HMBC and NOESY NMR spectroscopic data of natural **dasc#5** [4'-(asc-C5)-asc-C5, **3**] ( $\text{CD}_3\text{OD}$ ) isolated from the *exo*-metabolome of *D. magnus*. **dasc#5** [4'-(asc-C5)-asc-C5, **3**] was also isolated from *P. mayeri*. Carbon shifts were determined from HSQC and HMBC spectra. Chemical shifts were referenced to ( $\text{CD}_2\text{HOD}$ ) = 3.31 ppm and ( $\text{CD}_3\text{OD}$ ) = 49.0 ppm. NMR data are derived from spectra in *supplementary file 1b – Figures 16-26*.

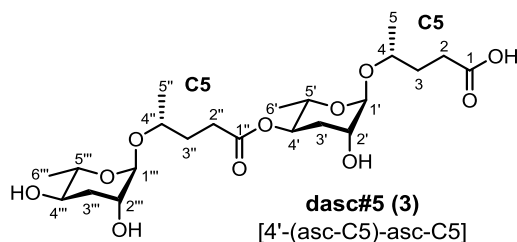

| Position | $\delta_{\text{C}}$ (ppm) | $\delta_{\text{H}}$ (mult., $J$ in Hz, intensity)                             | HMBC               | NOESY                    |
|----------|---------------------------|-------------------------------------------------------------------------------|--------------------|--------------------------|
| 1        | 181.5                     | -                                                                             | -                  | -                        |
| 2a       | 34.7                      | 2.24 ( <i>m</i> , 1H)                                                         | 1, 3, 4            | 2b, 3                    |
| 2b       | 34.7                      | 2.35 ( <i>m</i> , 1H)                                                         | 1, 3, 4            | 2a, 3                    |
| 3        | 34.1                      | 1.82 ( <i>m</i> , 2H)                                                         | 1, 2, 4, 5         | 2a, 2b, 4, 5             |
| 4        | 71.7                      | 3.82 ( <i>m</i> , 1H)                                                         | 2, 1'              | 1', 3, 5                 |
| 5        | 18.1                      | 1.15 ( <i>d</i> , $J_{4,5} = 6.3$ , 3H)                                       | 3, 4               | 1', 3, 4                 |
| 1'       | 97.0                      | 4.69 ( <i>s</i> , 1H)                                                         | 4, 3', 5'          | 2', 4, 5                 |
| 2'       | 69.2                      | 3.72 ( <i>s.br</i> , $J_{1',2'} = 2.6$ , 1H)                                  | 4'                 | 1', 3' ax, 3' eq         |
| 3'ax     | 32.8                      | 1.87 ( <i>ddd</i> , $J_{2',3'ax} = 3.0$ , $J_{3'ax,3'eq} = 13.1$ , 1H)        | 2'                 | 2', 3' eq, 4', 5'        |
| 3'eq     | 32.8                      | 2.04 ( <i>ddd</i> , $J_{2',3'eq} = 4.9$ , 1H)                                 | 2'                 | 3' ax, 4'                |
| 4'       | 71.2                      | 4.86 ( <i>ddd</i> , $J_{3'ax,4'} = 11.2$ , $J_{3'eq,4'} = 4.1$ , 1H)          | -                  | 3'ax, 3' eq              |
| 5'       | 67.9                      | 3.89 ( <i>dq</i> , $J_{4',5'} = 10.0$ , 1H)                                   | -                  | 3'ax, 6'                 |
| 6'       | 18.5                      | 1.15 ( <i>d</i> , $J_{5',6'} = 6.4$ , 3H)                                     | 4', 5'             | 4', 5'                   |
| 1''      | 174.3                     | -                                                                             | -                  | -                        |
| 2''a     | 31.3                      | 2.43 ( <i>m</i> , 1H)                                                         | 1'', 3'', 4''      | 2''b, 3''                |
| 2''b     | 31.3                      | 2.47 ( <i>m</i> , 1H)                                                         | 1'', 3'', 4''      | 2''a, 3''                |
| 3''      | 35.0                      | 1.80 ( <i>m</i> , 2H)                                                         | 1'', 2'', 4'', 5'' | 2''a, 2''b, 4'', 5''     |
| 4''      | 71.1                      | 3.82 ( <i>m</i> , 1H)                                                         | 1'''               | 1''', 3'', 5''           |
| 5''      | 18.1                      | 1.15 ( <i>d</i> , $J_{4'',5''} = 6.3$ , 3H)                                   | 3'', 4''           | 1''', 3'', 4''           |
| 1'''     | 97.1                      | 4.65 ( <i>s</i> , 1H)                                                         | 4'', 3'''          | 2''', 4'', 5''           |
| 2'''     | 69.5                      | 3.72 ( <i>s.br</i> , $J_{1'',2''} = 2.6$ , 1H)                                | 4'''               | 1''', 3'''ax, 3'''eq     |
| 3'''ax   | 35.7                      | 1.77 ( <i>ddd</i> , $J_{2'',3'''ax} = 3.2$ , $J_{3'''ax,3'''eq} = 13.3$ , 1H) | 1''', 2'''         | 2''', 3'''eq, 4''', 5''' |
| 3'''eq   | 35.7                      | 1.95 ( <i>ddd</i> , $J_{2'',3'''eq} = 4.8$ , 1H)                              | 1''', 2'''         | 2''', 3'''ax, 4'''       |
| 4'''     | 68.2                      | 3.51 ( <i>ddd</i> , $J_{3'''ax,4''} = 11.4$ , $J_{3'''eq,4''} = 3.9$ , 1H)    | 5'''               | 3'''ax, 3'''eq, 6'''     |
| 5'''     | 71.1                      | 3.58 ( <i>dq</i> , $J_{4''',5'''} = 9.6$ , 1H)                                | -                  | 3'''ax, 6'''             |
| 6'''     | 17.8                      | 1.22 ( <i>d</i> , $J_{5''',6'''} = 6.2$ , 3H)                                 | 4''', 5'''         | 4''', 5'''               |

**Table 10.**  $^1\text{H}$  (800 MHz) NMR spectroscopic data of natural **dasc#6** [2'-(asc-C6)-asc-C5, **4**] ( $\text{CD}_3\text{OD}$ ) isolated from the *exo*-metabolome of *P. entomophagus*. Chemical shift was referenced to  $(\text{CD}_2\text{HOD}) = 3.31$  ppm. NMR data are derived from spectra in *supplementary file 1b – Figure 27*.

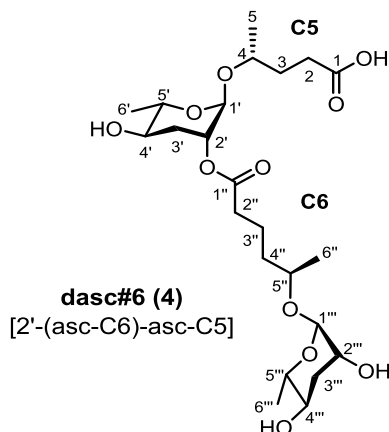

| Position | $\delta_{\text{H}}$ (mult., $J$ in Hz, intensity)                             |
|----------|-------------------------------------------------------------------------------|
| 1        | -                                                                             |
| 2a       | 2.30 ( <i>m</i> , 1H)                                                         |
| 2b       | 2.38 ( <i>m</i> , 1H)                                                         |
| 3        | 1.81 ( <i>m</i> , 2H)                                                         |
| 4        | 3.83 ( <i>m</i> , 1H)                                                         |
| 5        | 1.14 ( <i>d</i> , $J_{4,5} = 6.3$ , 3H)                                       |
| 1'       | 4.72 ( <i>s</i> , 1H)                                                         |
| 2'       | 4.78 ( <i>s.br</i> , $J_{1',2'} = 2.1$ , 1H)                                  |
| 3'ax     | 1.90 ( <i>ddd</i> , $J_{2',3'ax} = 3.1$ , $J_{3'ax,3'eq} = 13.3$ , 1H)        |
| 3'eq     | 2.00 ( <i>ddd</i> , $J_{2',3'eq} = 5.8$ , 1H)                                 |
| 4'       | 3.39 ( <i>ddd</i> , $J_{3'ax,4'} = 11.1$ , $J_{3'eq,4'} = 4.0$ , 1H)          |
| 5'       | 3.70 ( <i>dq</i> , $J_{4',5'} = 9.3$ , 1H)                                    |
| 6'       | 1.21 ( <i>d</i> , $J_{5',6'} = 6.2$ , 3H)                                     |
| 1''      | -                                                                             |
| 2''      | 2.21 ( <i>t</i> , $J_{2'',3''} = 6.1$ , 2H)                                   |
| 3''      | 1.59 ( <i>m</i> , 2H)                                                         |
| 4''      | 1.52 ( <i>m</i> , 1H)                                                         |
| 5''      | 3.81 ( <i>m</i> , 1H)                                                         |
| 6''      | 1.14 ( <i>d</i> , $J_{5'',6''} = 6.3$ , 3H)                                   |
| 1'''     | 4.65 ( <i>s</i> , 1H)                                                         |
| 2'''     | 3.71 ( <i>s.br</i> , $J_{1'',2''} = 2.5$ , 1H)                                |
| 3'''ax   | 1.77 ( <i>ddd</i> , $J_{2'',3'''ax} = 3.1$ , $J_{3'''ax,3'''eq} = 13.3$ , 1H) |
| 3'''eq   | 1.96 ( <i>ddd</i> , $J_{2'',3'''eq} = 6.3$ , 1H)                              |
| 4'''     | 3.51 ( <i>ddd</i> , $J_{3'''ax,4''} = 11.0$ , $J_{3'''eq,4''} = 3.8$ , 1H)    |
| 5'''     | 3.61 ( <i>dq</i> , $J_{4'',5''} = 9.3$ , 1H)                                  |
| 6'''     | 1.22 ( <i>d</i> , $J_{5'',6''} = 6.2$ , 3H)                                   |

**Table 11.**  $^1\text{H}$  (800 MHz) spectroscopic data of natural **dasc#10** [4'-(asc-C5)-asc-C7, **5**] ( $\text{CD}_3\text{OD}$ ) isolated from the *exo*-metabolome of *P. mayeri*. Carbon shifts were determined from HSQC spectra. Chemical shifts was referenced to ( $\text{CD}_2\text{HOD}$ ) = 3.31 ppm and ( $\text{CD}_3\text{OD}$ ) = 49.0 ppm. n.d. denotes not determined. NMR data are derived from spectra in *supplementary file 1b – Figures 28-31*.

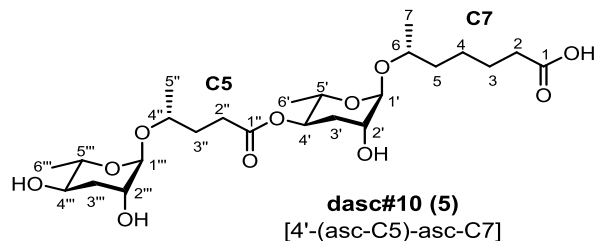

| Position | $\delta_{\text{C}}$ (ppm) | $\delta_{\text{H}}$ (mult., $J$ in Hz, intensity)                                | NOESY                |
|----------|---------------------------|----------------------------------------------------------------------------------|----------------------|
| 1        | n.d.                      | -                                                                                | -                    |
| 2        | 39.1                      | 2.18 ( <i>m</i> , 2H)                                                            | 3                    |
| 3        | 27.2                      | 1.61 ( <i>m</i> , 2H)                                                            | 2, 4                 |
| 4        | 22.6                      | 1.39 ( <i>m</i> , 2H)                                                            | 3, 5                 |
| 5a       | 34.1                      | 1.54 ( <i>m</i> , 1H)                                                            | 4, 6                 |
| 5b       | 34.1                      | 1.61 ( <i>m</i> , 1H)                                                            | 4, 6                 |
| 6        | 72.3                      | 3.79 ( <i>m</i> , 1H)                                                            | 5a, 5b, 7, 1'        |
| 7        | 18.8                      | 1.15 ( <i>d</i> , $J_{4', 5''} = 6.1$ , 3H)                                      | 6, 1'                |
| 1'       | 97.4                      | 4.68 ( <i>s</i> , 1H)                                                            | 6, 7, 2'             |
| 2'       | 69.2                      | 3.71 ( <i>s.br</i> , $J_{1', 2'} = 2.1$ , 1H)                                    | 1', 3'ax, 3'eq       |
| 3'ax     | 33.4                      | 1.84 ( <i>ddd</i> , $J_{2', 3'ax} = 3.6$ , $J_{3'ax, 3'eq} = 12.8$ , 1H)         | 2', 3'eq, 4'         |
| 3'eq     | 33.4                      | 2.04 ( <i>ddd</i> , $J_{2', 3'eq} = 5.8$ , 1H)                                   | 2', 3'ax, 4'         |
| 4'       | 70.8                      | 4.86 ( <i>ddd</i> , $J_{3'ax, 4'} = 11.2$ , $J_{3'eq, 4'} = 4.0$ , 1H)           | 3'ax, 3'eq           |
| 5'       | 68.2                      | 3.85 ( <i>dq</i> , $J_{4', 5'} = 9.6$ , 1H)                                      | 3'ax, 6'             |
| 6'       | 18.5                      | 1.15 ( <i>d</i> , $J_{5', 6'} = 6.2$ , 3H)                                       | 5'                   |
| 1''      | n.d.                      | -                                                                                | -                    |
| 2''      | 39.2                      | 2.47 ( <i>m</i> , 2H)                                                            | 3''                  |
| 3''      | 35.2                      | 1.80 ( <i>m</i> , 2H)                                                            | 2'', 4'', 5''        |
| 4''      | 71.8                      | 3.83 ( <i>m</i> , 1H)                                                            | 1'', 3'', 5''        |
| 5''      | 18.5                      | 1.15 ( <i>d</i> , $J_{4'', 5''} = 6.1$ , 3H)                                     | 4'', 1'''            |
| 1'''     | 97.2                      | 4.65 ( <i>s</i> , 1H)                                                            | 4'', 5'', 2'''       |
| 2'''     | 69.6                      | 3.72 ( <i>s.br</i> , $J_{1''', 2'''} = 2.5$ , 1H)                                | 1''', 3'''ax, 3'''eq |
| 3'''ax   | 35.8                      | 1.76 ( <i>ddd</i> , $J_{2''', 3'''ax} = 3.1$ , $J_{3'''ax, 3'''eq} = 13.6$ , 1H) | 2''', 3'''eq, 4'''   |
| 3'''eq   | 35.8                      | 1.95 ( <i>ddd</i> , $J_{2''', 3'''eq} = 6.7$ , 1H)                               | 2''', 3'''ax, 4'''   |
| 4'''     | 68.3                      | 3.51 ( <i>ddd</i> , $J_{3'''ax, 4'''} = 11.0$ , $J_{3'''eq, 4'''} = 4.0$ , 1H)   | 3'''ax, 3'''eq       |
| 5'''     | 71.2                      | 3.58 ( <i>dq</i> , $J_{4''', 5'''} = 9.3$ , 1H)                                  | 3'''ax, 6'''         |
| 6'''     | 17.9                      | 1.22 ( <i>d</i> , $J_{5''', 6'''} = 6.2$ , 3H)                                   | 5'''                 |

**Table 12.**  $^1\text{H}$  (800 MHz),  $^{13}\text{C}$  (200 MHz) and NOESY NMR spectroscopic data of natural **dasc#14** [4'-(asc- $\Delta\text{C7}$ )-asc-C5, **6**] ( $\text{CD}_3\text{OD}$ ) isolated from the *exo*-metabolome of *P. entomophagus*. Carbon shifts were determined from HSQC and HMBC spectra. Chemical shifts were referenced to ( $\text{CD}_2\text{HOD}$ ) = 3.31 ppm and ( $\text{CD}_3\text{OD}$ ) = 49.0 ppm. n.d. denotes not determined. NMR data are derived from spectra in *supplementary file 1b – Figures 32-39*.

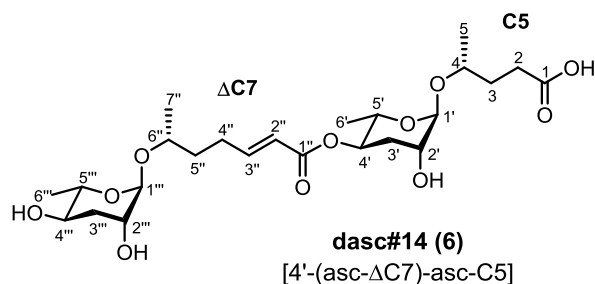

| Position | $\delta_{\text{C}}$ (ppm) | $\delta_{\text{H}}$ (mult., $J$ in Hz, intensity)                                    | NOESY                    |
|----------|---------------------------|--------------------------------------------------------------------------------------|--------------------------|
| 1        | n.d.                      | -                                                                                    | -                        |
| 2a       | 35.3                      | 2.28 (dt, $J_{2\text{a}, 2\text{b}} = 14.9$ , $J_{2\text{a}, 3} = 6.7$ , 1H)         | 2b, 3, 4, 5              |
| 2b       | 35.3                      | 2.36 (dt, $J_{2\text{b}, 3} = 7.4$ , 1H)                                             | 2a, 3, 4, 5              |
| 3        | 34.9                      | 1.77 (m, 2H)                                                                         | 2a, 2b, 4, 1', 5         |
| 4        | 71.9                      | 3.83 (m, $J_{3, 4} = 5.8$ , 1H)                                                      | 2a, 2b, 3, 5, 1'         |
| 5        | 18.5                      | 1.16 (d, $J_{4, 5} = 6.1$ , 3H)                                                      | 2a, 2b, 3, 4, 1'         |
| 1'       | 97.1                      | 4.70 (s, 1H)                                                                         | 2', 4, 5                 |
| 2'       | 69.5                      | 3.73 (s.br, $J_{1', 2'} = 3.5$ , 1H)                                                 | 1', 3'ax, 3'eq           |
| 3'ax     | 32.9                      | 1.89 (ddd, $J_{2', 3'\text{ax}} = 3.0$ , $J_{3'\text{ax}, 3'\text{eq}} = 13.0$ , 1H) | 2', 3'eq, 4', 5'         |
| 3'eq     | 32.9                      | 2.05 (ddd, $J_{2', 3'\text{eq}} = 4.8$ , 1H)                                         | 3'ax, 4'                 |
| 4'       | 71.0                      | 4.91 (ddd, $J_{3'\text{ax}, 4'} = 11.7$ , $J_{3'\text{eq}, 4'} = 4.0$ , 1H)          | 5', 6', 3'ax, 3'eq       |
| 5'       | 68.0                      | 3.91 (dq, $J_{4', 5'} = 9.5$ , 1H)                                                   | 3'ax, 6'                 |
| 6'       | 18.5                      | 1.15 (d, $J_{5', 6'} = 6.2$ , 3H)                                                    | 4', 5'                   |
| 1''      | n.d.                      | -                                                                                    | -                        |
| 2''      | 122.0                     | 5.87 (d, $J_{2'', 3''} = 15.7$ , 1H)                                                 | 3'', 4'', 5''            |
| 3''      | 150.9                     | 7.02 (dt, $J_{3'', 4''} = 6.8$ , 1H)                                                 | 2'', 4'', 5''            |
| 4''      | 29.2                      | 2.39 (m, 2H)                                                                         | 2'', 3'', 5'', 6'', 7''  |
| 5''      | 36.2                      | 1.68 (m, 2H)                                                                         | 3'', 4'', 6'', 7''       |
| 6''      | 71.7                      | 3.83 (m, 1H)                                                                         | 4'', 5'', 7'', 1'''      |
| 7''      | 17.6                      | 1.16 (d, $J_{6'', 7''} = 6.1$ , 3H)                                                  | 4'', 6'', 1'''           |
| 1'''     | 97.0                      | 4.66 (s, 1H)                                                                         | 2''', 6'', 7''           |
| 2'''     | 69.4                      | 3.72 (s.br, $J_{1''', 2'''} = 3.4$ , 1H)                                             | 1''', 3'''ax, 3'''eq     |
| 3'''ax   | 35.8                      | 1.77 (ddd, $J_{2''', 3'''ax} = 3.1$ , $J_{3'''ax, 3'''eq} = 13.5$ , 1H)              | 2''', 3'''eq, 4''', 5''' |
| 3'''eq   | 35.8                      | 1.95 (ddd, $J_{2''', 3'''eq} = 4.7$ , 1H)                                            | 2''', 3'''ax, 4'''       |
| 4'''     | 68.1                      | 3.52 (ddd, $J_{3'''ax, 4'''} = 12.0$ , $J_{3'''eq, 4'''} = 3.8$ , 1H)                | 3'''ax, 3'''eq, 6'''     |
| 5'''     | 71.1                      | 3.60 (dq, $J_{4''', 5'''} = 9.4$ , 1H)                                               | 3'''ax, 6'''             |
| 6'''     | 18.0                      | 1.22 (d, $J_{5''', 6'''} = 6.3$ , 3H)                                                | 4''', 5'''               |

**Table 13.**  $^1\text{H}$  (800 MHz),  $^{13}\text{C}$  (200 MHz) and NOESY NMR spectroscopic data of natural **dasc#17** [4'-(asc- $\Delta\text{C7}$ )-asc- $\Delta\text{C7}$ , **8**] ( $\text{CD}_3\text{OD}$ ) isolated from the *exo*-metabolome of *P. uniformis*. Carbon shifts were determined from HSQC and HMBC spectra. Chemical shifts were referenced to ( $\text{CD}_2\text{HOD}$ ) = 3.31 ppm and ( $\text{CD}_3\text{OD}$ ) = 49.0 ppm. n.d. denotes not determined. NMR data are derived from spectra in *supplementary file 1b – Figures 40-46*.

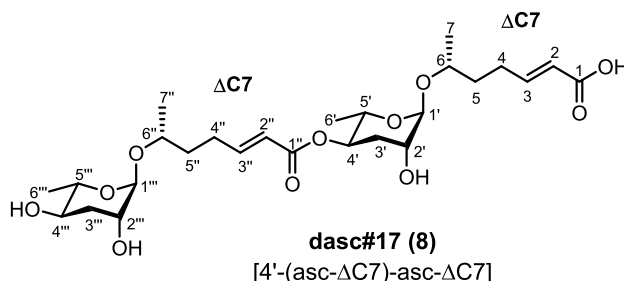

| Position | $\delta_{\text{C}}$ (ppm) | $\delta_{\text{H}}$ (mult., $J$ in Hz, intensity)                             | NOESY                |
|----------|---------------------------|-------------------------------------------------------------------------------|----------------------|
| 1        | n.d.                      | -                                                                             | -                    |
| 2        | 128.9                     | 5.86 ( <i>d</i> , $J_{2,3} = 15.5$ , 1H)                                      | 3, 4, 5              |
| 3        | 143.2                     | 6.68 ( <i>dt</i> , $J_{3,4a} = 6.7$ , $J_{3,4b} = 7.1$ , 1H)                  | 2, 4, 5              |
| 4a       | 29.0                      | 2.23 ( <i>m</i> , $J_{4a,4b} = 13.9$ , 1H)                                    | 2, 3, 5, 6, 7        |
| 4b       | 29.0                      | 2.31 ( <i>m</i> , 1H)                                                         | 2, 3, 5, 6, 7        |
| 5        | 35.8                      | 1.65 ( <i>m</i> , 2H)                                                         | 3, 4, 6, 7           |
| 6        | 71.6                      | 3.84 ( <i>m</i> , 1H)                                                         | 4, 5, 7, 1'          |
| 7        | 18.0                      | 1.15 ( <i>d</i> , $J_{6,7} = 6.3$ , 3H)                                       | 5, 6, 1'             |
| 1'       | 97.3                      | 4.71 ( <i>s</i> , 1H)                                                         | 6, 7, 2'             |
| 2'       | 68.8                      | 3.74 ( <i>s.br</i> , $J_{1',2'} = 3.5$ , 1H)                                  | 1', 3'ax, 3'eq       |
| 3'ax     | 32.6                      | 1.88 ( <i>ddd</i> , $J_{2',3'ax} = 3.0$ , $J_{3'ax,3'eq} = 13.0$ , 1H)        | 2', 3'eq, 5'         |
| 3'eq     | 32.6                      | 2.06 ( <i>ddd</i> , $J_{2',3'eq} = 4.9$ , 1H)                                 | 3'ax, 4'             |
| 4'       | 71.1                      | 4.91 ( <i>ddd</i> , $J_{3'ax,4'} = 11.2$ , $J_{3'eq,4'} = 4.0$ , 1H)          | 3'eq, 5', 6'         |
| 5'       | 68.1                      | 3.88 ( <i>dq</i> , $J_{4',5'} = 9.6$ , 1H)                                    | 4', 6', 3'ax         |
| 6'       | 18.6                      | 1.14 ( <i>d</i> , $J_{5',6'} = 6.3$ , 3H)                                     | 4', 5'               |
| 1''      | n.d.                      | -                                                                             | -                    |
| 2''      | 121.9                     | 5.89 ( <i>d</i> , $J_{2'',3''} = 16.0$ , 1H)                                  | 3'', 4'', 5''        |
| 3''      | 150.7                     | 7.02 ( <i>dt</i> , $J_{3'',4''a} = 6.9$ , $J_{3'',4''b} = 7.2$ , 1H)          | 2'', 4'', 5''        |
| 4''a     | 29.3                      | 2.36 ( <i>m</i> , $J_{4''a,4''b} = 13.8$ , 1H)                                | 3'', 5'', 6'', 7''   |
| 4''b     | 29.3                      | 2.40 ( <i>m</i> , 1H)                                                         | 3'', 5'', 6'', 7''   |
| 5''      | 36.6                      | 1.68 ( <i>m</i> , 2H)                                                         | 3'', 4'', 6'', 7''   |
| 6''      | 71.2                      | 3.82 ( <i>m</i> , 1H)                                                         | 4'', 5'', 7'', 1'''  |
| 7''      | 18.7                      | 1.16 ( <i>d</i> , $J_{6'',7''} = 6.3$ , 3H)                                   | 5'', 6'', 1'''       |
| 1'''     | 97.0                      | 4.66 ( <i>s</i> , 1H)                                                         | 6'', 7'', 2'''       |
| 2'''     | 69.9                      | 3.72 ( <i>s.br</i> , $J_{1'',2'''} = 3.6$ , 1H)                               | 1''', 3'''ax, 3'''eq |
| 3'''ax   | 35.6                      | 1.77 ( <i>ddd</i> , $J_{2'',3'''ax} = 3.1$ , $J_{3'''ax,3'''eq} = 13.2$ , 1H) | 2''', 3'''eq, 5'''   |
| 3'''eq   | 35.6                      | 1.96 ( <i>ddd</i> , $J_{2'',3'''eq} = 4.9$ , 1H)                              | 2''', 3'''ax, 4'''   |
| 4'''     | 68.0                      | 3.52 ( <i>ddd</i> , $J_{3'''ax,4'''} = 11.1$ , $J_{3'''eq,4'''} = 4.0$ , 1H)  | 3'''eq, 5''', 6'''   |
| 5'''     | 71.0                      | 3.60 ( <i>dq</i> , $J_{4'',5'''} = 9.3$ , 1H)                                 | 3'''ax, 4''', 6'''   |
| 6'''     | 17.9                      | 1.22 ( <i>d</i> , $J_{5'',6'''} = 6.2$ , 3H)                                  | 4''', 5'''           |

**Table 14.**  $^1\text{H}$  (800 MHz),  $^{13}\text{C}$  (200 MHz), HMBC and NOESY NMR spectroscopic data of natural **paso#9** (Artyukhin *et al.*, 2018) ( $\text{CD}_3\text{OD}$ ) isolated from the *exo*-metabolome of *P. pacificus*. Carbon shifts were determined from HSQC and HMBC spectra. Chemical shifts were referenced to ( $\text{CD}_2\text{HOD}$ ) = 3.31 ppm and ( $\text{CD}_3\text{OD}$ ) = 49.0 ppm. n.d. denotes not detected. NMR data are derived from spectra in *supplementary file 1c – Figures 5-13*.

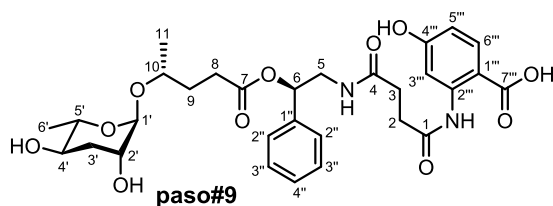

| No.  | $\delta_{\text{C}}$ [ppm] | $\delta_{\text{H}}$ [mult., $J$ in Hz, intensity]              | HMBC             | NOESY              |
|------|---------------------------|----------------------------------------------------------------|------------------|--------------------|
| 1    | 170.8                     | -                                                              | -                | -                  |
| 2    | 33.1                      | 2.69 (t, $J_{2,3} = 7.1$ , 2H)                                 | 1, 4             | 3                  |
| 3    | 30.8                      | 2.56 (t, 2H)                                                   | 1, 4             | 2                  |
| 4    | 173.4                     | -                                                              | -                | -                  |
| 5a   | 44.2                      | 3.51 (dd, $J_{5a,5b} = 14.3$ , $J_{5a,6} = 8.4$ , 1H)          | 4, 6, 1''        | 6, 2''             |
| 5b   | 44.2                      | 3.59 (dd, $J_{5b,6} = 4.4$ , 1H)                               | 4, 6, 1''        | 6, 2''             |
| 6    | 74.5                      | 5.83 (dd, 1H)                                                  | 2''              | 2''                |
| 7    | 173.0                     | -                                                              | -                | -                  |
| 8    | 30.7                      | 2.52 (m, 2H)                                                   | 7, 10            | 9, 10, 11          |
| 9    | 32.3                      | 1.82 (m, 2H)                                                   | 7, 8, 11         | 10, 11             |
| 10   | 70.3                      | 3.77 (m, 1H)                                                   | n.d.             | 11, 1'             |
| 11   | 18.0                      | 1.11 (d, $J_{10,11} = 6.1$ , 3H)                               | 9, 10            | 1'                 |
| 1'   | 96.1                      | 4.63 (s, $J_{1',2'} = 2.3$ , 1H)                               | 10, 5'           | 10, 11, 2'         |
| 2'   | 68.6                      | 3.71 (s.br, $J_{2',3'ax} = 3.2$ , $J_{2',3'eq} = 4.8$ , 1H)    | 4'               | 3'ax, 3'eq         |
| 3'ax | 34.8                      | 1.76 (ddd, $J_{3'ax,3'eq} = 13.1$ , $J_{3'ax,4'} = 11.1$ , 1H) | 1', 2', 4'       | 4', 5'             |
| 3'eq | 34.8                      | 1.95 (ddd, $J_{3'eq,4'} = 4.0$ , 1H)                           | 1', 2', 4'       | 4', 3'ax           |
| 4'   | 67.1                      | 3.51 (ddd, $J_{4',5'} = 9.2$ , 1H)                             | 2', 3'           | 6'                 |
| 5'   | 70.1                      | 3.60 (dq, $J_{5',6'} = 6.2$ , 1H)                              | n.d.             | 8, 9, 10, 3'ax, 6' |
| 6'   | 17.0                      | 1.19 (d, 3H)                                                   | 4', 5'           | 5'                 |
| 1''  | 138.3                     | -                                                              | -                | -                  |
| 2''  | 126.2                     | 7.36 (m, 2H)                                                   | 6, 4''           | 3''                |
| 3''  | 128.2                     | 7.34 (m, 2H)                                                   | 1''              | 2'', 4''           |
| 4''  | 127.9                     | 7.28 (m, 1H)                                                   | 2''              | 3''                |
| 1''' | 114.2                     | -                                                              | -                | -                  |
| 2''' | 141.8                     | -                                                              | -                | -                  |
| 3''' | 105.8                     | 8.04 (d, 1H)                                                   | 1'''             | -                  |
| 4''' | 160.4                     | -                                                              | -                | -                  |
| 5''' | 109.1                     | 6.45 (dd, $J_{5'',6''} = 2.4$ , 1H)                            | 1''', 3'''       | 6'''               |
| 6''' | 132.8                     | 7.93 (d, $J_{6'',7''} = 8.6$ , 1H)                             | 7''', 4''', 2''' | 5'''               |
| 7''' | 173.4                     | -                                                              | -                | -                  |

**Table 15.**  $^1\text{H}$  (800 MHz),  $^{13}\text{C}$  (200 MHz), HMBC and NOESY NMR spectroscopic data of natural **ubas#30** [4'-UB-2'-(asc-C5)-asc-C5, **9**] ( $\text{CD}_3\text{OD}$ ) isolated from the *exo*-metabolome of *P. maxplancki*. Carbon shifts were determined from HSQC and HMBC spectra. Chemical shifts were referenced to ( $\text{CD}_2\text{HOD}$ ) = 3.31 ppm and ( $\text{CD}_3\text{OD}$ ) = 49.0 ppm. n.d. denotes not detected. NMR data are derived from spectra in *supplementary file 1d – Figures 1-8*.

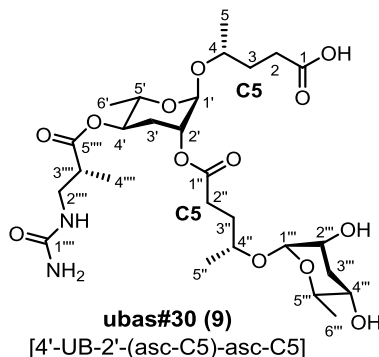

| Position | $\delta_{\text{C}}$ (ppm) | $\delta_{\text{H}}$ (mult., $J$ in Hz, intensity)                       | HMBC                   | NOESY                      |
|----------|---------------------------|-------------------------------------------------------------------------|------------------------|----------------------------|
| 1        | 181.3                     | -                                                                       | -                      | -                          |
| 2a       | 34.3                      | 2.28 (dt, $J_{2a, 2b} = 14.8$ , $J_{2a, 3} = 8.1$ , 1H)                 | 1, 3, 4                | 3, 4, 5, 5'                |
| 2b       | 34.3                      | 2.34 (dt, $J_{2b, 3} = 8.4$ , 1H)                                       | 1, 3, 4                | 3, 4, 5, 5'                |
| 3        | 34.7                      | 1.83 (m, 2H)                                                            | 1, 2, 4, 5             | 2, 4, 5                    |
| 4        | 72.9                      | 3.85 (m, $J_{3, 4} = 6.6$ , 1H)                                         | n.d.                   | 2, 3, 5, 1', 5'            |
| 5        | 18.1                      | 1.16 (d, $J_{4, 5} = 5.8$ , 3H)                                         | 3, 4                   | 2, 3, 4, 1'                |
| 1'       | 94.4                      | 4.78 (s, 1H)                                                            | 4, 3', 5'              | 4, 5, 2'                   |
| 2'       | 71.9                      | 4.81 (s.br, $J_{1', 2'} = 2.5$ , 1H)                                    | 4', 1''                | 3'ax, 3'eq, 1'             |
| 3'ax     | 29.9                      | 1.99 (ddd, $J_{2', 3'ax} = 3.1$ , $J_{3'ax, 3'eq} = 13.5$ , 1H)         | n.d.                   | 2', 3'eq, 4', 5'           |
| 3'eq     | 29.9                      | 2.12 (ddd, $J_{2', 3'eq} = 4.7$ , 1H)                                   | n.d.                   | 2', 3'ax, 4'               |
| 4'       | 71.1                      | 4.74 (ddd, $J_{3'ax, 4'} = 11.1$ , $J_{3'eq, 4'} = 4.1$ , 1H)           | n.d.                   | 3'ax, 3'eq, 5', 6'         |
| 5'       | 67.9                      | 3.96 (dq, $J_{4', 5'} = 9.5$ , 1H)                                      | n.d.                   | 2, 3'ax, 4', 6'            |
| 6'       | 17.6                      | 1.16 (d, $J_{5', 6'} = 6.0$ , 3H)                                       | 4', 5'                 | 4', 5'                     |
| 1''      | 173.9                     | -                                                                       | -                      | -                          |
| 2''      | 31.1                      | 2.53 (dd, $J_{2'', 3''} = 6.2$ , 2H)                                    | 1'', 3'', 4''          | 3'', 4'', 5'', 5'''        |
| 3''a     | 32.9                      | 1.82 (m, 1H)                                                            | 1'', 4'', 5''          | 2'', 4'', 5''              |
| 3''b     | 32.9                      | 1.88 (m, 1H)                                                            | 1'', 4'', 5''          | 2'', 4'', 5''              |
| 4''      | 71.1                      | 3.86 (d, $J_{3'', 4''} = 6.3$ , 1H)                                     | n.d.                   | 2'', 3'', 5'', 1''', 5'''  |
| 5''      | 18.7                      | 1.17 (d, $J_{4'', 5''} = 6.0$ , 3H)                                     | 3'', 4''               | 2'', 3'', 4'', 1'''        |
| 1'''     | 97.1                      | 4.66 (s, 1H)                                                            | 4'', 3''', 5'''        | 4'', 5'', 2'''             |
| 2'''     | 69.7                      | 3.73 (s.br, $J_{1''', 2'''} = 2.8$ , 1H)                                | 4'''                   | 1''', 3'''ax, 3'''eq       |
| 3'''ax   | 35.7                      | 1.77 (ddd, $J_{2''', 3'''ax} = 3.3$ , $J_{3'''ax, 3'''eq} = 13.0$ , 1H) | n.d.                   | 2''', 3'''eq, 4''', 5'''   |
| 3'''eq   | 35.7                      | 1.95 (ddd, $J_{2''', 3'''eq} = 4.8$ , 1H)                               | n.d.                   | 2''', 3'''ax, 4'''         |
| 4'''     | 68.0                      | 3.51 (ddd, $J_{3'''ax, 4'''} = 11.1$ , $J_{3'''eq, 4'''} = 4.1$ , 1H)   | n.d.                   | 3'''ax, 3'''eq, 5''', 6''' |
| 5'''     | 71.2                      | 3.58 (dq, $J_{4''', 5'''} = 9.3$ , 1H)                                  | n.d.                   | 4''', 3'''ax, 6'''         |
| 6'''     | 17.9                      | 1.22 (d, $J_{5''', 6'''} = 6.1$ , 3H)                                   | 4''', 5'''             | 4''', 5'''                 |
| 1''''    | 161.8                     | -                                                                       | -                      | -                          |
| 2''''    | 43.4                      | 3.26 (m, $J_{2''', 3'''} = 6.7$ , 2H)                                   | 1''', 3''', 4''', 5''' | 3''', 4'''                 |
| 3''''    | 41.5                      | 2.68 (m, 1H)                                                            | 2''', 4''', 5'''       | 2''', 4'''                 |
| 4''''    | 14.7                      | 1.14 (d, $J_{3''', 4'''} = 7.1$ , 3H)                                   | 2''', 3''', 5'''       | 2''', 3'''                 |
| 5''''    | 175.6                     | -                                                                       | -                      | -                          |

**Table 16.**  $^1\text{H}$  (800 MHz),  $^{13}\text{C}$  (200 MHz), HMBC and NOESY NMR spectroscopic data of natural **ubas#34** [4'-UB-2'-(asc-C4)-asc-C4, **11**] ( $\text{CD}_3\text{OD}$ ) isolated from the *exo*-metabolome of *P. quartusdecimus*. Carbon shifts were determined from HSQC and HMBC spectra. Chemical shifts are referenced to ( $\text{CD}_2\text{HOD}$ ) = 3.31 ppm and ( $\text{CD}_3\text{OD}$ ) = 49.0 ppm. n.d. denotes not detected. NMR data are derived from spectra in *supplementary file 1d – Figures 21-28*.

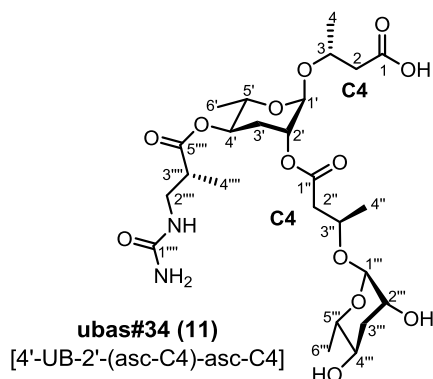

| Position | $\delta_{\text{C}}$ (ppm) | $\delta_{\text{H}}$ (mult., $J$ in Hz, intensity)                                | HMBC                                                      | NOESY                        |
|----------|---------------------------|----------------------------------------------------------------------------------|-----------------------------------------------------------|------------------------------|
| 1        | 176.8                     | -                                                                                | -                                                         | -                            |
| 2a       | 44.8                      | 2.41 ( <i>dd</i> , $J_{2a, 3} = 5.1$ , 1H)                                       | 1, 3, 4                                                   | 2b, 3, 4                     |
| 2b       | 44.8                      | 2.50 ( <i>dd</i> , $J_{2a, 2b} = 14.8$ , $J_{2b, 3} = 8.4$ , 1H)                 | 1, 3, 4                                                   | 2a, 3, 4                     |
| 3        | 70.6                      | 4.27 ( <i>m</i> , 1H)                                                            | 1 <sup>‡</sup> , 1 <sup>‡</sup>                           | 2a, 2b, 4, 1', 5'            |
| 4        | 18.8                      | 1.21 ( <i>d</i> , $J_{3, 4} = 6.1$ , 3H)                                         | 2, 3                                                      | 2a, 2b, 3, 1'                |
| 1'       | 94.1                      | 4.83 ( <i>s</i> , 1H)                                                            | 3', 5', 3 <sup>‡</sup>                                    | 3, 4                         |
| 2'       | 72.1                      | 4.81 ( <i>s.br</i> , $J_{1', 2'} = 2.6$ , 1H)                                    | 1'', 4'                                                   | 4, 3'ax, 3'eq                |
| 3'ax     | 29.9                      | 1.98 ( <i>ddd</i> , $J_{2', 3'ax} = 3.1$ , $J_{3'ax, 3'eq} = 13.5$ , 1H)         | 1', 2', 4', 5'                                            | 2', 3'eq, 4', 5'             |
| 3'eq     | 29.9                      | 2.11 ( <i>ddd</i> , $J_{2', 3'eq} = 4.7$ , 1H)                                   | 1', 2', 4', 5'                                            | 2', 3'ax, 4'                 |
| 4'       | 71.1                      | 4.75 ( <i>ddd</i> , $J_{3'ax, 4'} = 11.1$ , $J_{3'eq, 4'} = 4.0$ , 1H)           | 5', 6', 5'''                                              | 5', 6', 3'ax, 3'eq           |
| 5'       | 67.8                      | 4.03 ( <i>dq</i> , $J_{4', 5'} = 9.6$ , 1H)                                      | n.d.                                                      | 3, 3'ax, 4', 6'              |
| 6'       | 17.7                      | 1.15 ( <i>d</i> , $J_{5', 6'} = 6.2$ , 3H)                                       | 4', 5'                                                    | 4', 5'                       |
| 1''      | 171.9                     | -                                                                                | -                                                         | -                            |
| 2''a     | 43.0                      | 2.56 ( <i>dd</i> , $J_{2''a, 3} = 5.0$ , 1H)                                     | 1'', 3'', 4''                                             | 2''b, 3'', 4''               |
| 2''b     | 43.0                      | 2.62 ( <i>dd</i> , $J_{2''a, 2''b} = 14.8$ , $J_{2''b, 3''} = 8.4$ , 1H)         | 1'', 3'', 4''                                             | 2''a, 3'', 4''               |
| 3''      | 69.7                      | 4.27 ( <i>m</i> , 1H)                                                            | 1''' <sup>‡</sup> , 1''' <sup>‡</sup> , 2''' <sup>‡</sup> | 2''a, 2''b, 4'', 1''', 5'''  |
| 4''      | 19.0                      | 1.24 ( <i>d</i> , $J_{3'', 4''} = 6.1$ , 3H)                                     | 2'', 3''                                                  | 2''a, 2''b, 3'', 1'''        |
| 1'''     | 97.4                      | 4.68 ( <i>s</i> , 1H)                                                            | 3'', 3'', 5'''                                            | 3'', 4'', 2''', 3'''ax, 5''' |
| 2'''     | 69.5                      | 3.72 ( <i>s.br</i> , $J_{1''', 2'''} = 3.2$ , 1H)                                | 4'''                                                      | 4'', 1''', 3'''ax, 3'''eq    |
| 3'''ax   | 35.6                      | 1.74 ( <i>ddd</i> , $J_{2''', 3'''ax} = 3.0$ , $J_{3'''ax, 3'''eq} = 13.1$ , 1H) | 1''', 2''', 4''', 5'''                                    | 2''', 3'''eq, 4''', 5'''     |
| 3'''eq   | 35.6                      | 1.93 ( <i>ddd</i> , $J_{2''', 3'''eq} = 4.9$ , 1H)                               | 1''', 2''', 4''', 5'''                                    | 2''', 3'''ax, 4'''           |
| 4'''     | 68.0                      | 3.49 ( <i>ddd</i> , $J_{3'''ax, 4'''} = 11.2$ , $J_{3'''eq, 4'''} = 3.9$ , 1H)   | 5''', 6'''                                                | 3'''ax, 3'''eq, 6'''         |
| 5'''     | 71.1                      | 3.56 ( <i>dq</i> , $J_{4''', 5'''} = 9.3$ , 1H)                                  | n.d.                                                      | 3'', 3'''ax, 6'''            |
| 6'''     | 17.9                      | 1.21 ( <i>d</i> , $J_{5''', 6'''} = 6.1$ , 3H)                                   | 4''', 5'''                                                | 4''', 5'''                   |
| 1''''    | 161.8                     | -                                                                                | -                                                         | -                            |
| 2''''    | 43.4                      | 3.25 ( <i>d</i> , $J_{2''', 2''''} = 6.6$ , 2H)                                  | 1''', 3''', 4''', 5'''                                    | 3''', 4'''                   |
| 3''''    | 41.5                      | 2.67 ( <i>m</i> , 1H)                                                            | 2''', 5'''                                                | 2''', 4'''                   |
| 4''''    | 14.7                      | 1.13 ( <i>d</i> , $J_{3''', 4''''} = 7.2$ , 3H)                                  | 2''', 3''', 5'''                                          | 2''', 3'''                   |
| 5''''    | 175.7                     | -                                                                                | -                                                         | -                            |

<sup>‡</sup> indicates HMBC correlations summarized from the HMBC spectrum of an enriched SPE fraction containing ubas#34 [4'-UB-2'-(asc-C4)-asc-C4, **11**] (*supplementary file 1d – Figure 27*).

**Table 17.**  $^1\text{H}$  (800 MHz) spectroscopic data of natural **ubas#35** [4'-UB-2'-(asc-C4)-asc-C5, **12**] ( $\text{CD}_3\text{OD}$ ) isolated from the *exo*-metabolome of *P. quartusdecimus*. Chemical shift was referenced to ( $\text{CD}_2\text{HOD}$ ) = 3.31 ppm. NMR data are derived from spectra in *supplementary file 1d – Figure 29*.

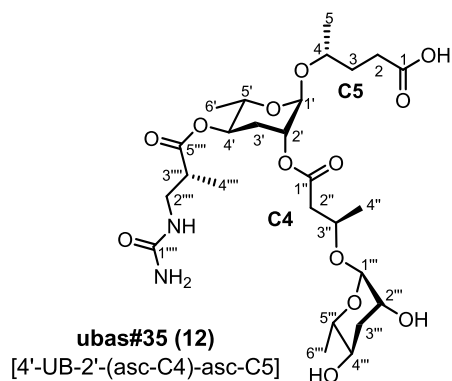

| Position | $\delta_{\text{H}}$ (mult., $J$ in Hz, intensity)                                |
|----------|----------------------------------------------------------------------------------|
| 1        | -                                                                                |
| 2a       | 2.32 ( <i>dd</i> , $J_{2a, 2b} = 14.7$ , $J_{2a, 3} = 4.2$ , 1H)                 |
| 2b       | 2.36 ( <i>dd</i> , $J_{2b, 3} = 7.8$ , 1H)                                       |
| 3        | 1.84 ( <i>m</i> , 1H)                                                            |
| 4        | 3.85 ( <i>m</i> , 1H)                                                            |
| 5        | 1.18 ( <i>d</i> , $J_{4, 5} = 6.1$ , 3H)                                         |
| 1'       | 4.81 ( <i>s</i> , 1H)                                                            |
| 2'       | 4.83 ( <i>s.br</i> , $J_{1', 2'} = 2.4$ , 1H)                                    |
| 3'ax     | 2.01 ( <i>ddd</i> , $J_{2', 3'ax} = 3.1$ , $J_{3'ax, 3'eq} = 13.7$ , 1H)         |
| 3'eq     | 2.13 ( <i>ddd</i> , $J_{2', 3'eq} = 4.7$ , 1H)                                   |
| 4'       | 4.78 ( <i>ddd</i> , $J_{3'ax, 4'} = 12.4$ , $J_{3'eq, 4'} = 4.3$ , 1H)           |
| 5'       | 3.98 ( <i>dq</i> , $J_{4', 5'} = 9.2$ , 1H)                                      |
| 6'       | 1.17 ( <i>d</i> , $J_{5', 6'} = 6.2$ , 3H)                                       |
| 1''      | -                                                                                |
| 2''a     | 2.56 ( <i>dd</i> , $J_{2''a, 2''b} = 15.0$ , $J_{2''a, 3''} = 5.4$ , 1H)         |
| 2''b     | 2.62 ( <i>dd</i> , $J_{2''b, 3''} = 7.7$ , 1H)                                   |
| 3''      | 4.27 ( <i>m</i> , 1H)                                                            |
| 4''      | 1.24 ( <i>d</i> , $J_{4'', 5''} = 6.2$ , 3H)                                     |
| 1'''     | 4.68 ( <i>s</i> , 1H)                                                            |
| 2'''     | 3.73 ( <i>s.br</i> , $J_{1''', 2'''} = 2.9$ , 1H)                                |
| 3'''ax   | 1.77 ( <i>ddd</i> , $J_{2''', 3'''ax} = 3.0$ , $J_{3'''ax, 3'''eq} = 13.0$ , 1H) |
| 3'''eq   | 1.95 ( <i>ddd</i> , $J_{2''', 3'''eq} = 6.4$ , 1H)                               |
| 4'''     | 3.50 ( <i>ddd</i> , $J_{3'''ax, 4'''} = 11.6$ , $J_{3'''eq, 4'''} = 4.1$ , 1H)   |
| 5'''     | 3.57 ( <i>dq</i> , $J_{4''', 5'''} = 9.4$ , 1H)                                  |
| 6'''     | 1.22 ( <i>d</i> , $J_{5''', 6'''} = 6.2$ , 3H)                                   |
| 1''''    | -                                                                                |
| 2''''    | 3.27 ( <i>d</i> , $J_{2''', 3''''} = 7.0$ , 2H)                                  |
| 3''''    | 2.67 ( <i>m</i> , 1H)                                                            |
| 4''''    | 1.16 ( <i>d</i> , $J_{3''', 4''''} = 6.9$ , 3H)                                  |
| 5''''    | -                                                                                |

**Table 18.**  $^1\text{H}$  (800 MHz),  $^{13}\text{C}$  (200 MHz), HMBC and NOESY NMR spectroscopic data of natural **ubas#28** [4'-UB-2'-(asc-C5)-asc-C4, **13**] ( $\text{CD}_3\text{OD}$ ) isolated from the *exo*-metabolome of *P. fukushima*. Carbon shifts were determined from HSQC and HMBC spectra. Chemical shifts were referenced to ( $\text{CD}_2\text{HOD}$ ) = 3.31 ppm and ( $\text{CD}_3\text{OD}$ ) = 49.0 ppm. n.d. denotes not detected. NMR data are derived from spectra in *supplementary file 1d – Figures 36-42*.

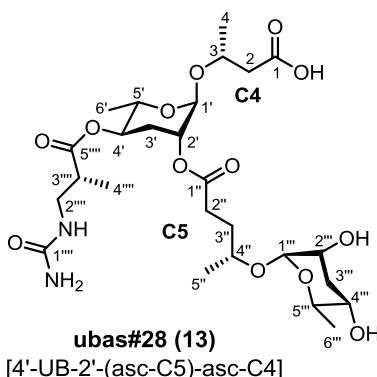

| Position | $\delta_{\text{C}}$ (ppm) | $\delta_{\text{H}}$ (mult., $J$ in Hz, intensity)                       | HMBC                   | NOESY                            |
|----------|---------------------------|-------------------------------------------------------------------------|------------------------|----------------------------------|
| 1        | 176.2                     | -                                                                       | -                      | -                                |
| 2a       | 44.4                      | 2.43 (dd, $J_{2a, 3} = 4.9$ , 1H)                                       | 1, 3, 4                | 2b, 3, 4                         |
| 2b       | 44.4                      | 2.50 (dd, $J_{2a, 2b} = 14.5$ , $J_{2b, 3} = 8.3$ , 1H)                 | 1, 3, 4                | 2a, 3, 4                         |
| 3        | 70.5                      | 4.28 (m, 1H)                                                            | n.d.                   | 2a, 2b, 4, 1', 5'                |
| 4        | 18.8                      | 1.21 (d, $J_{3, 4} = 6.1$ , 3H)                                         | 2, 3                   | 2a, 2b, 3, 1'                    |
| 1'       | 94.3                      | 4.80 (s, 1H)                                                            | 3', 5', 3              | 3, 4, 2'                         |
| 2'       | 71.9                      | 4.81 (s.br, $J_{1', 2'} = 2.6$ , 1H)                                    | 1''                    | 1', 3'ax, 3'eq                   |
| 3'ax     | 30.0                      | 1.96 (ddd, $J_{2', 3'ax} = 3.1$ , $J_{3'ax, 3'eq} = 13.4$ , 1H)         | 1', 2', 4', 5'         | 2', 3'eq, 5'                     |
| 3'eq     | 30.0                      | 2.09 (ddd, $J_{2', 3'eq} = 4.7$ , 1H)                                   | 1', 2', 4', 5'         | 2', 3'ax, 4', 6'                 |
| 4'       | 71.1                      | 4.72 (ddd, $J_{3'ax, 4'} = 11.3$ , $J_{3'eq, 4'} = 4.3$ , 1H)           | n.d.                   | 3'eq, 5', 6'                     |
| 5'       | 67.7                      | 4.01 (dq, $J_{4', 5'} = 9.6$ , 1H)                                      | n.d.                   | 3'ax, 4', 6'                     |
| 6'       | 17.8                      | 1.15 (d, $J_{5', 6'} = 6.2$ , 3H)                                       | 4', 5'                 | 4', 5'                           |
| 1''      | 173.7                     | -                                                                       | -                      | -                                |
| 2''      | 31.1                      | 2.53 (t, $J_{2'', 3''a} = 7.4$ , $J_{2'', 3''b} = 6.6$ , 2H)            | 1'', 3'', 4''          | 3''a, 3''b, 4'', 5'', 5'''       |
| 3''a     | 33.0                      | 1.82 (m, $J_{3''a, 4''} = 6.6$ , 1H)                                    | 1'', 2'', 4'', 5''     | 2'', 3''b, 4'', 5''              |
| 3''b     | 33.0                      | 1.87 (m, $J_{3''a, 3''b} = 14.4$ , $J_{3''b, 4''} = 7.1$ , 1H)          | 1'', 2'', 4'', 5''     | 2'', 3''a, 4'', 5''              |
| 4''      | 71.2                      | 3.86 (m, 1H)                                                            | n.d.                   | 2'', 3''a, 3''b, 5'', 1''', 5''' |
| 5''      | 18.8                      | 1.17 (d, $J_{4'', 5''} = 6.1$ , 3H)                                     | 3'', 4''               | 2'', 3''a, 3''b, 4'', 1'''       |
| 1'''     | 97.2                      | 4.66 (s, 1H)                                                            | 4'', 3''', 5'''        | 4'', 5'', 2'''                   |
| 2'''     | 69.7                      | 3.73 (s.br, $J_{1''', 2'''} = 2.9$ , 1H)                                | 4'''                   | 1''', 3'''ax, 3'''eq             |
| 3'''ax   | 35.7                      | 1.77 (ddd, $J_{2''', 3'''ax} = 3.1$ , $J_{3'''ax, 3'''eq} = 13.1$ , 1H) | 1''', 2''', 4''', 5''' | 2''', 3'''eq, 4''', 5'''         |
| 3'''eq   | 35.7                      | 1.95 (ddd, $J_{2''', 3'''eq} = 4.9$ , 1H)                               | 1''', 2''', 4''', 5''' | 2''', 3'''ax, 4'''               |
| 4'''     | 68.1                      | 3.51 (ddd, $J_{3'''ax, 4'''} = 11.3$ , $J_{3'''eq, 4'''} = 4.1$ , 1H)   | 5'''                   | 3'''ax, 3'''eq, 5''', 6'''       |
| 5'''     | 71.2                      | 3.59 (dq, $J_{4''', 5'''} = 9.4$ , 1H)                                  | 4'''                   | 2'', 4'', 3'''ax, 6'''           |
| 6'''     | 18.0                      | 1.23 (d, $J_{5''', 6'''} = 6.2$ , 3H)                                   | 4''', 5'''             | 4''', 5'''                       |
| 1''''    | 161.8                     | -                                                                       | -                      | -                                |
| 2''''    | 43.4                      | 3.25 (d, $J_{2''', 2''''} = 7.0$ , 2H)                                  | 1''', 3''', 4''', 5''' | 3''', 4'''                       |
| 3''''    | 41.5                      | 2.66 (m, 1H)                                                            | 2''', 4''', 5'''       | 2''', 4'''                       |
| 4''''    | 14.7                      | 1.13 (d, $J_{3''', 4''''} = 6.9$ , 3H)                                  | 2''', 3''', 5'''       | 2''', 3'''                       |
| 5''''    | 175.8                     | -                                                                       | -                      | -                                |

**Table 19.**  $^1\text{H}$  (800 MHz) NMR spectroscopic data of natural **upas#34** [4'-UP-2'-(asc-C4)-asc-C4, **14**] ( $\text{CD}_3\text{OD}$ ) isolated from the *exo*-metabolome of *P. quartusdecimus*. Chemical shift was referenced to ( $\text{CD}_2\text{HOD}$ ) = 3.31. NMR data are derived from spectra in *supplementary file 1e – Figure 1*.

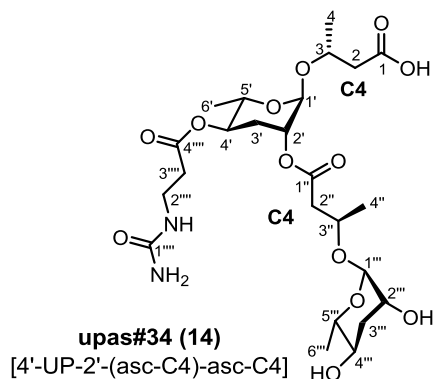

| Position | $\delta_{\text{H}}$ (mult., $J$ in Hz, intensity)                        |
|----------|--------------------------------------------------------------------------|
| 1        | -                                                                        |
| 2a       | 2.38 ( <i>dd</i> , $J_{2a, 3} = 6.8$ , 1H)                               |
| 2b       | 2.49 ( <i>dd</i> , $J_{2a, 2b} = 13.7$ , $J_{2b, 3} = 8.3$ , 1H)         |
| 3        | 4.28 ( <i>m</i> , 1H)                                                    |
| 4        | 1.20 ( <i>d</i> , $J_{3, 4} = 6.4$ , 3H)                                 |
| 1'       | 4.77 ( <i>s</i> , 1H)                                                    |
| 2'       | 4.85 (1H)                                                                |
| 3'ax     | 1.97 ( $J_{3'ax, 3'eq} = 13.7$ , 1H)                                     |
| 3'eq     | 2.11 (1H)                                                                |
| 4'       | 4.75 (1H)                                                                |
| 5'       | 4.04 ( <i>dq</i> , $J_{4', 5'} = 9.4$ , 1H)                              |
| 6'       | 1.14 ( <i>d</i> , $J_{5', 6'} = 6.1$ , 3H)                               |
| 1''      | -                                                                        |
| 2''a     | 2.57 ( <i>dd</i> , $J_{2''a, 3''} = 7.6$ , 1H)                           |
| 2''b     | 2.62 ( <i>dd</i> , $J_{2''a, 2''b} = 13.4$ , $J_{2''b, 3''} = 8.2$ , 1H) |
| 3''      | 4.27 ( <i>m</i> , 1H)                                                    |
| 4''      | 1.24 ( <i>d</i> , $J_{3'', 4''} = 6.5$ , 3H)                             |
| 1'''     | 4.68 ( <i>s</i> , 1H)                                                    |
| 2'''     | 3.72 (1H)                                                                |
| 3'''ax   | 1.74 ( $J_{3'''ax, 3'''eq} = 13.4$ , 1H)                                 |
| 3'''eq   | 1.93 (1H)                                                                |
| 4'''     | 3.49 (1H)                                                                |
| 5'''     | 3.57 ( <i>dq</i> , $J_{4''', 5'''} = 9.6$ , 1H)                          |
| 6'''     | 1.21 ( <i>d</i> , $J_{5''', 6'''} = 6.2$ , 3H)                           |
| 1''''    | -                                                                        |
| 2''''    | 3.36 ( <i>t</i> , $J_{2''', 3''''} = 6.4$ , 2H)                          |
| 3''''    | 2.51 ( <i>t</i> , 2H)                                                    |
| 4''''    | -                                                                        |

**Table 20.**  $^1\text{H}$  (800 MHz) NMR spectroscopic data of natural **upas#28** [4'-UP-2'-(asc-C5)-asc-C4, **15**] ( $\text{CD}_3\text{OD}$ ) isolated from the *exo*-metabolome of *P. fukushima*. Chemical shift was referenced to ( $\text{CD}_2\text{HOD}$ ) = 3.31 ppm. NMR data are derived from spectra in *supplementary file 1e – Figure 2*.

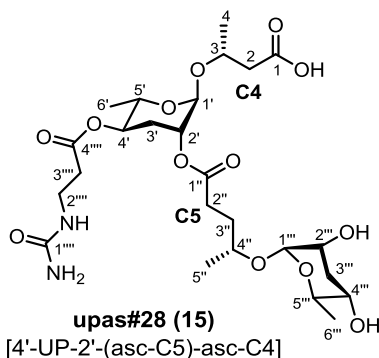

| Position | $\delta_{\text{H}}$ (mult., $J$ in Hz, intensity)                                |
|----------|----------------------------------------------------------------------------------|
| 1        | -                                                                                |
| 2a       | 2.29 ( <i>dd</i> , $J_{2a, 3} = 6.0$ , 1H)                                       |
| 2b       | 2.48 ( <i>dd</i> , $J_{2a, 2b} = 13.6$ , $J_{2b, 3} = 8.0$ , 1H)                 |
| 3        | 4.27 ( <i>m</i> , 1H)                                                            |
| 4        | 1.19 ( <i>d</i> , $J_{3, 4} = 6.1$ , 3H)                                         |
| 1'       | 4.79 ( <i>s</i> , 1H)                                                            |
| 2'       | 4.80 ( <i>s.br</i> , $J_{1', 2'} = 2.6$ , 1H)                                    |
| 3'ax     | 2.02 ( <i>ddd</i> , $J_{2', 3'ax} = 3.6$ , $J_{3'ax, 3'eq} = 13.5$ , 1H)         |
| 3'eq     | 2.09 ( <i>ddd</i> , $J_{2', 3'eq} = 4.9$ , 1H)                                   |
| 4'       | 4.73 ( <i>ddd</i> , $J_{3'ax, 4'} = 11.3$ , $J_{3'eq, 4'} = 4.5$ , 1H)           |
| 5'       | 4.07 ( <i>dq</i> , $J_{4', 5'} = 9.6$ , 1H)                                      |
| 6'       | 1.15 ( <i>d</i> , $J_{5', 6'} = 6.2$ , 3H)                                       |
| 1''      | -                                                                                |
| 2''      | 2.51 ( <i>t</i> , 2H)                                                            |
| 3''a     | 1.82 ( <i>m</i> , 1H)                                                            |
| 3''b     | 1.86 ( <i>m</i> , 1H)                                                            |
| 4''      | 3.86 ( <i>m</i> , 1H)                                                            |
| 5''      | 1.18 ( <i>d</i> , $J_{4'', 5''} = 6.2$ , 3H)                                     |
| 1'''     | 4.67 ( <i>s</i> , 1H)                                                            |
| 2'''     | 3.73 ( <i>s.br</i> , $J_{1''', 2'''} = 3.0$ , 1H)                                |
| 3'''ax   | 1.77 ( <i>ddd</i> , $J_{2''', 3'''ax} = 3.1$ , $J_{3'''ax, 3'''eq} = 13.1$ , 1H) |
| 3'''eq   | 1.95 ( <i>ddd</i> , $J_{2''', 3'''eq} = 4.9$ , 1H)                               |
| 4'''     | 3.51 ( <i>ddd</i> , $J_{3'''ax, 4'''} = 11.3$ , $J_{3'''eq, 4'''} = 4.2$ , 1H)   |
| 5'''     | 3.58 ( <i>dq</i> , $J_{4''', 5'''} = 9.6$ , 1H)                                  |
| 6'''     | 1.22 ( <i>d</i> , $J_{5''', 6'''} = 6.1$ , 3H)                                   |
| 1''''    | -                                                                                |
| 2''''    | 3.36 ( <i>t</i> , $J_{2''', 2''''} = 6.5$ , 2H)                                  |
| 3''''    | 2.51 ( <i>t</i> , 2H)                                                            |
| 4''''    | -                                                                                |

## References

Artyukhin AB, Zhang Y, Akagi AE, Panda O, Sternberg PW, Schroeder FC. 2018. Metabolomic "dark matter" dependent on peroxisomal  $\beta$ -oxidation in *Caenorhabditis elegans*. *Journal of the American Chemical Society* **140**:2841-2852. DOI: <https://doi.org/10.1021/jacs.7b11811>
