# Supplementary material for: Convergent evolution of small molecule pheromones in Pristionchus nematodes
Source: eLife journal article supplement (doi:10.7554/elife.55687), 2020-04-27
Supplement: supp [file elife-55687-supp-v1.zip › elife_poa_e55687_Supplementary_file_4.pdf]

**supplementary file 4:** Ancestral reconstruction results for individual compounds.

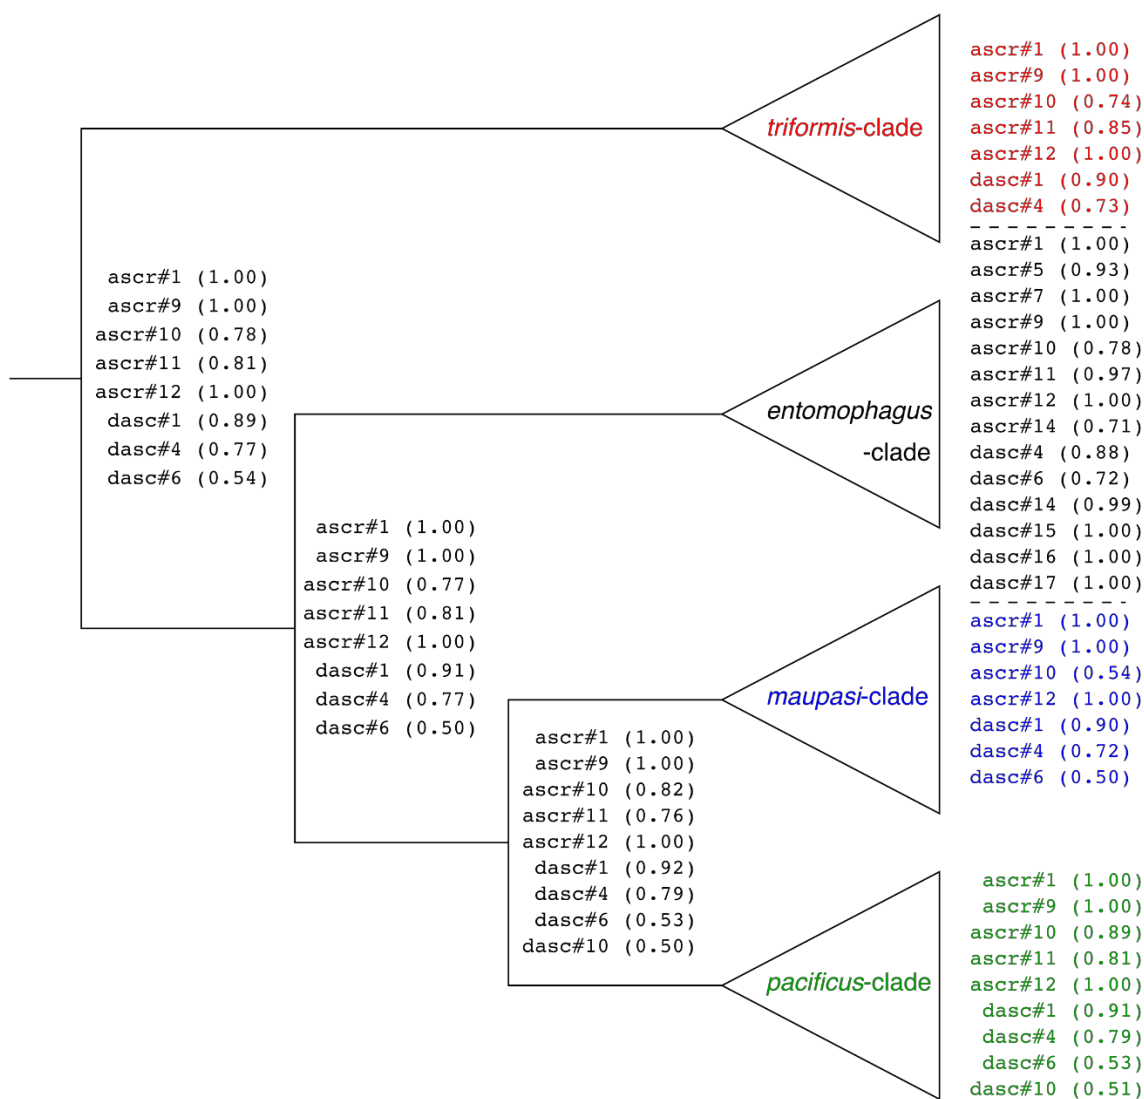

**Figure 1. Summary of ancestral reconstruction results at key nodes in the *Pristionchus* phylogeny.** The results of ancestral reconstruction results for individual NDMMs (provided in *supplementary file 4 – Figure 2*) were extracted for the key nodes that define the major *Pristionchus* clades. Results show NDMMs predicted to be present at the given node (with probability provided in parentheses). Three NDMMs—*ascr#1*, *ascr#9*, and *ascr#12*—were not explicitly reconstructed: these compounds are present in all studied species and were therefore assumed to be present at all internal nodes with Prob = 1.0. Entries to the right correspond to predictions for the ancestral nodes for the respective *Pristionchus* clade (red = *triformis*; black = *entomophagus*; blue = *maupasi*; green = *pacificus*).

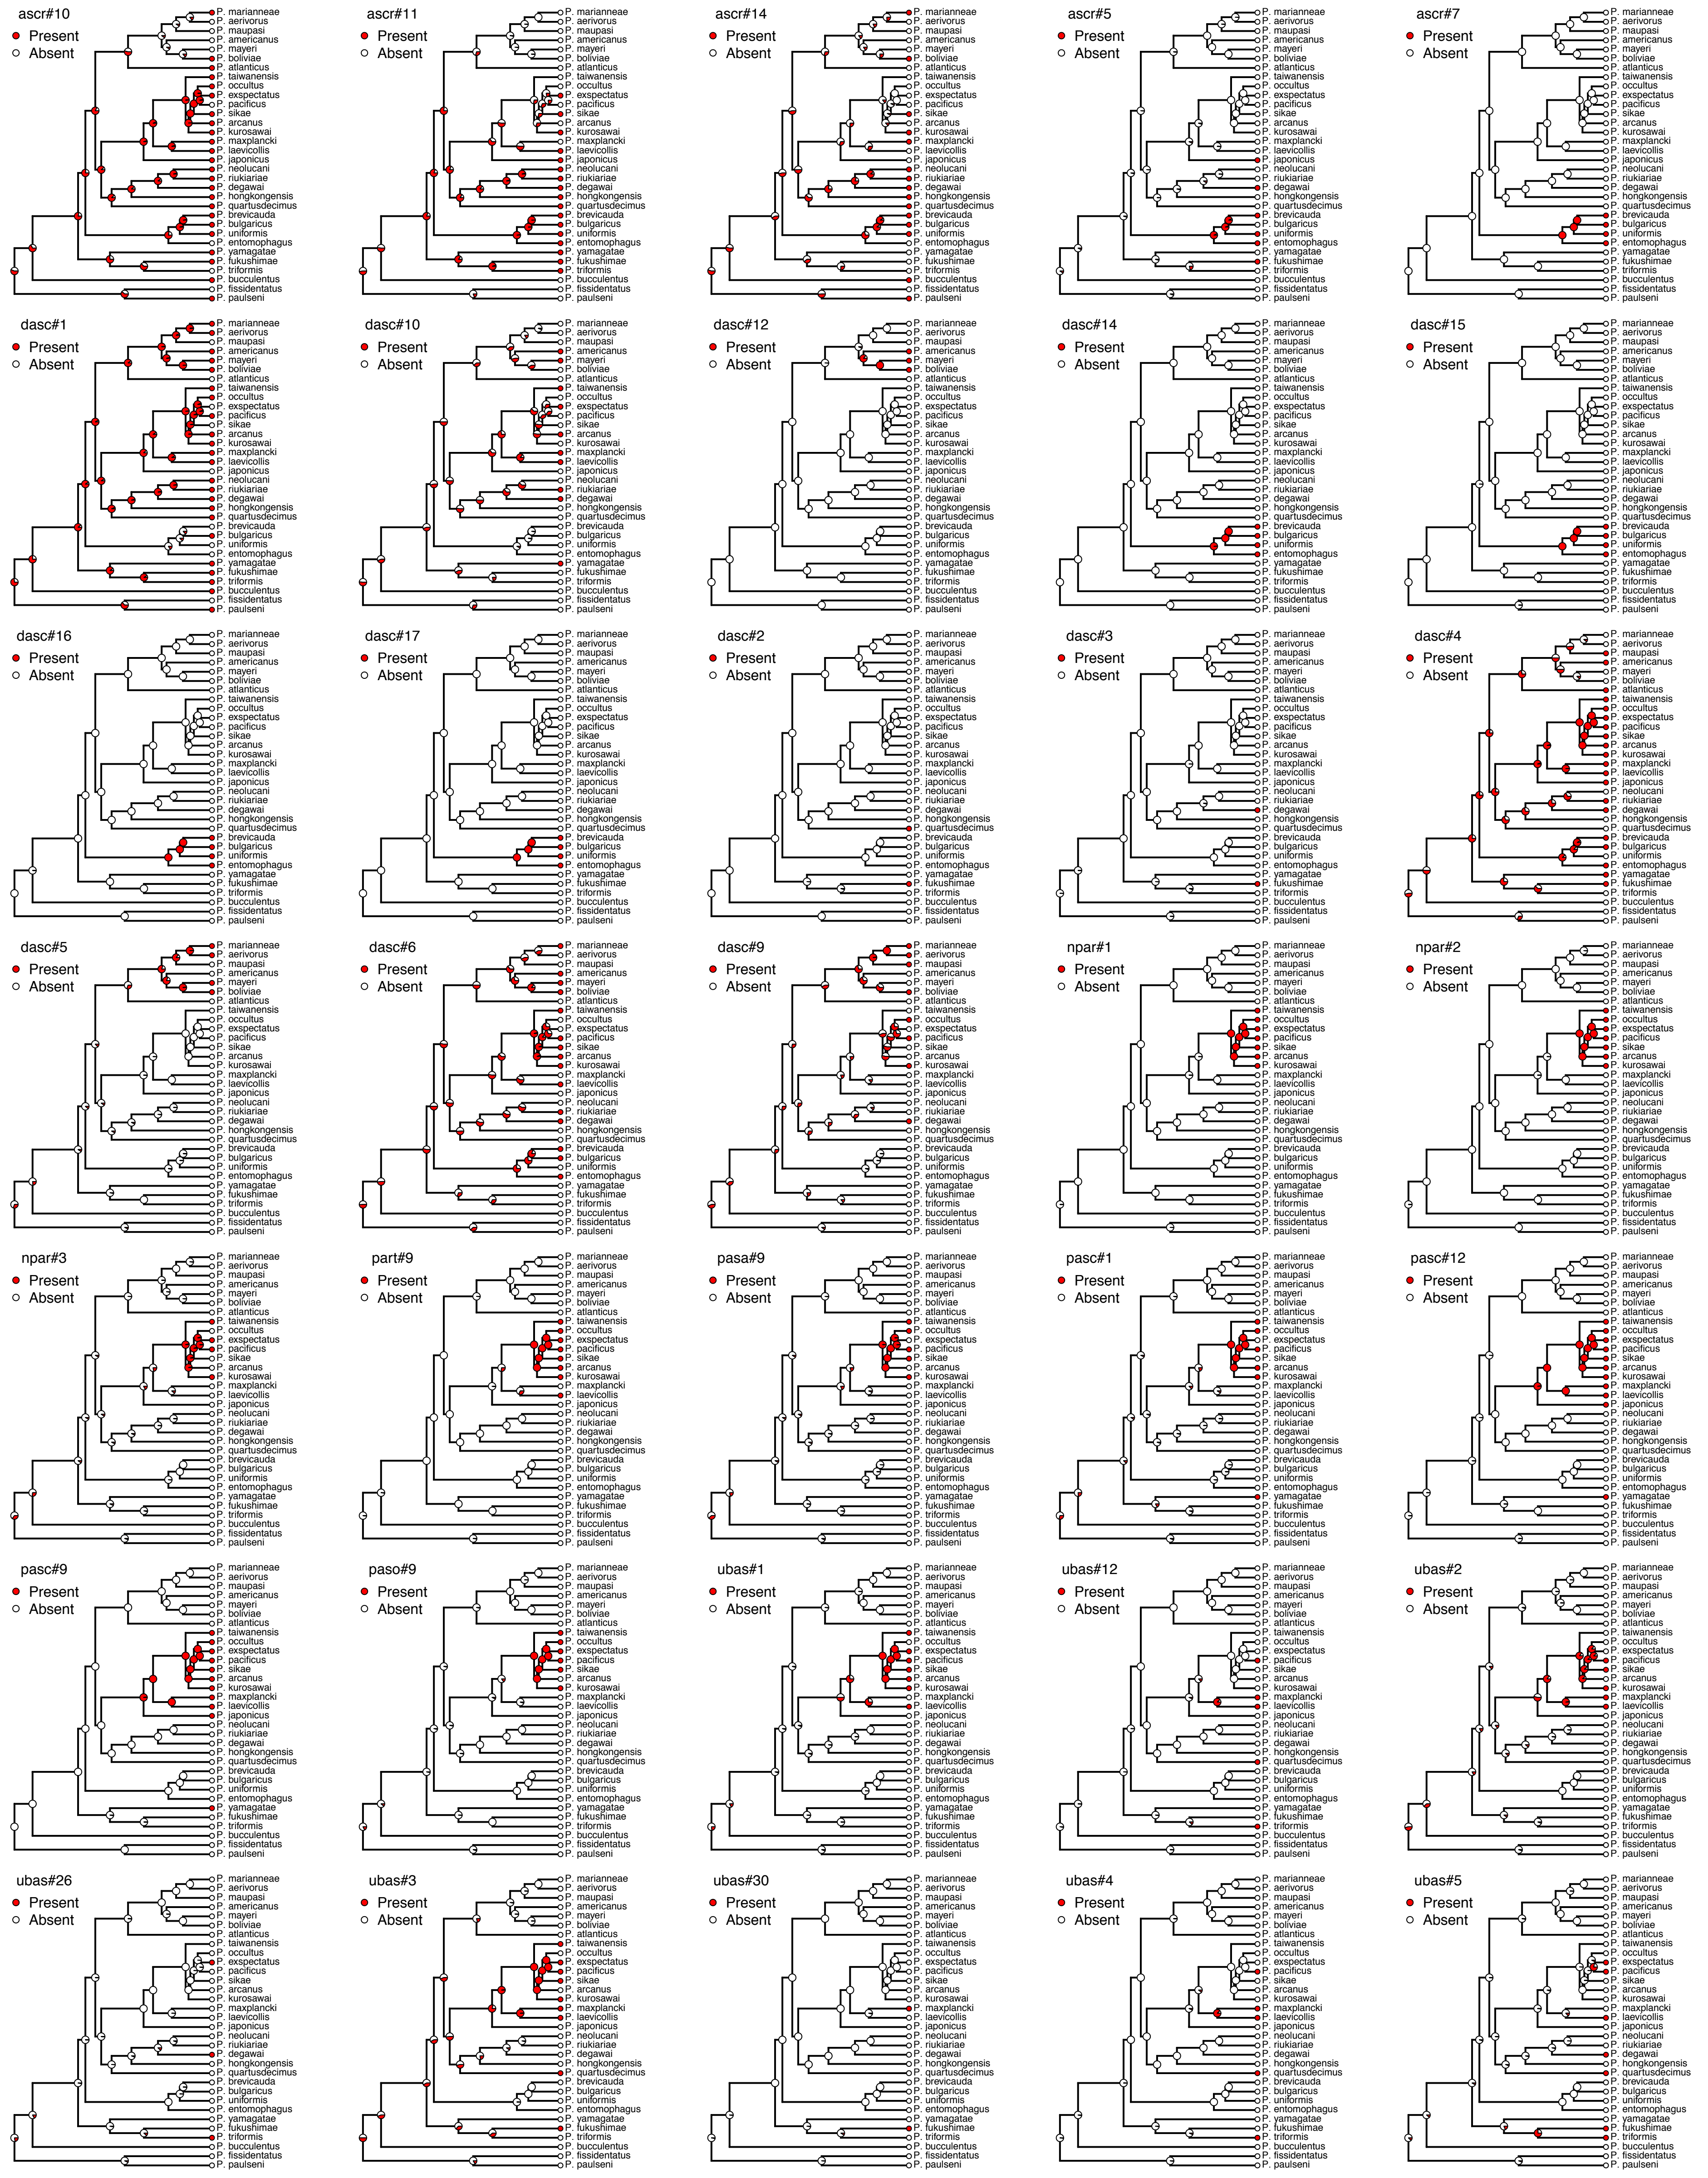

**Figure 2. Ancestral reconstruction results for individual NDMMs.** Ancestral reconstruction was performed for all non-constant, non-singleton NDMMs listed in *Figure 2* of the main text.
