# Supplementary figures and images for: Convergent evolution of small molecule pheromones in Pristionchus nematodes
Source: eLife journal article supplement (doi:10.7554/elife.55687), 2020-04-27

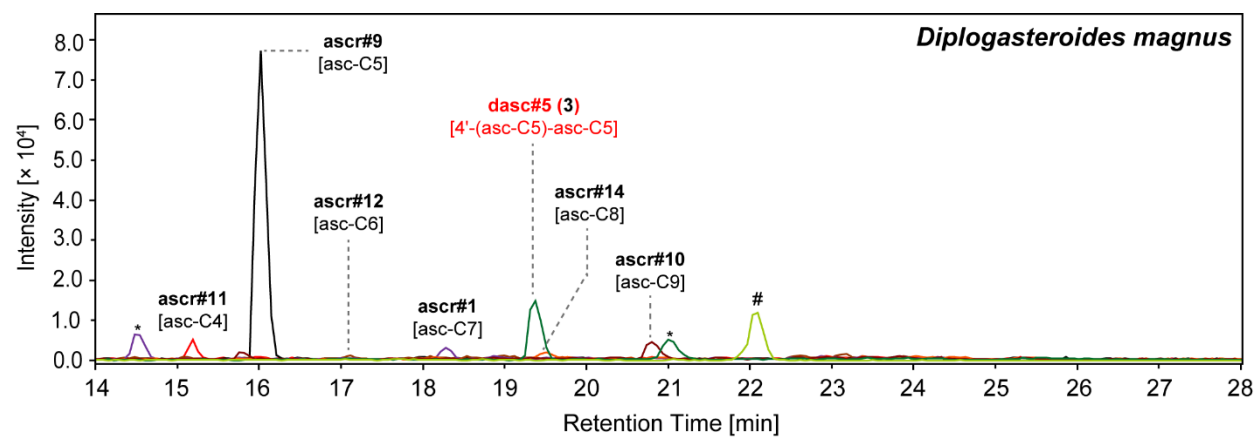

Supplement: supp [file elife-55687-supp-v1.zip]

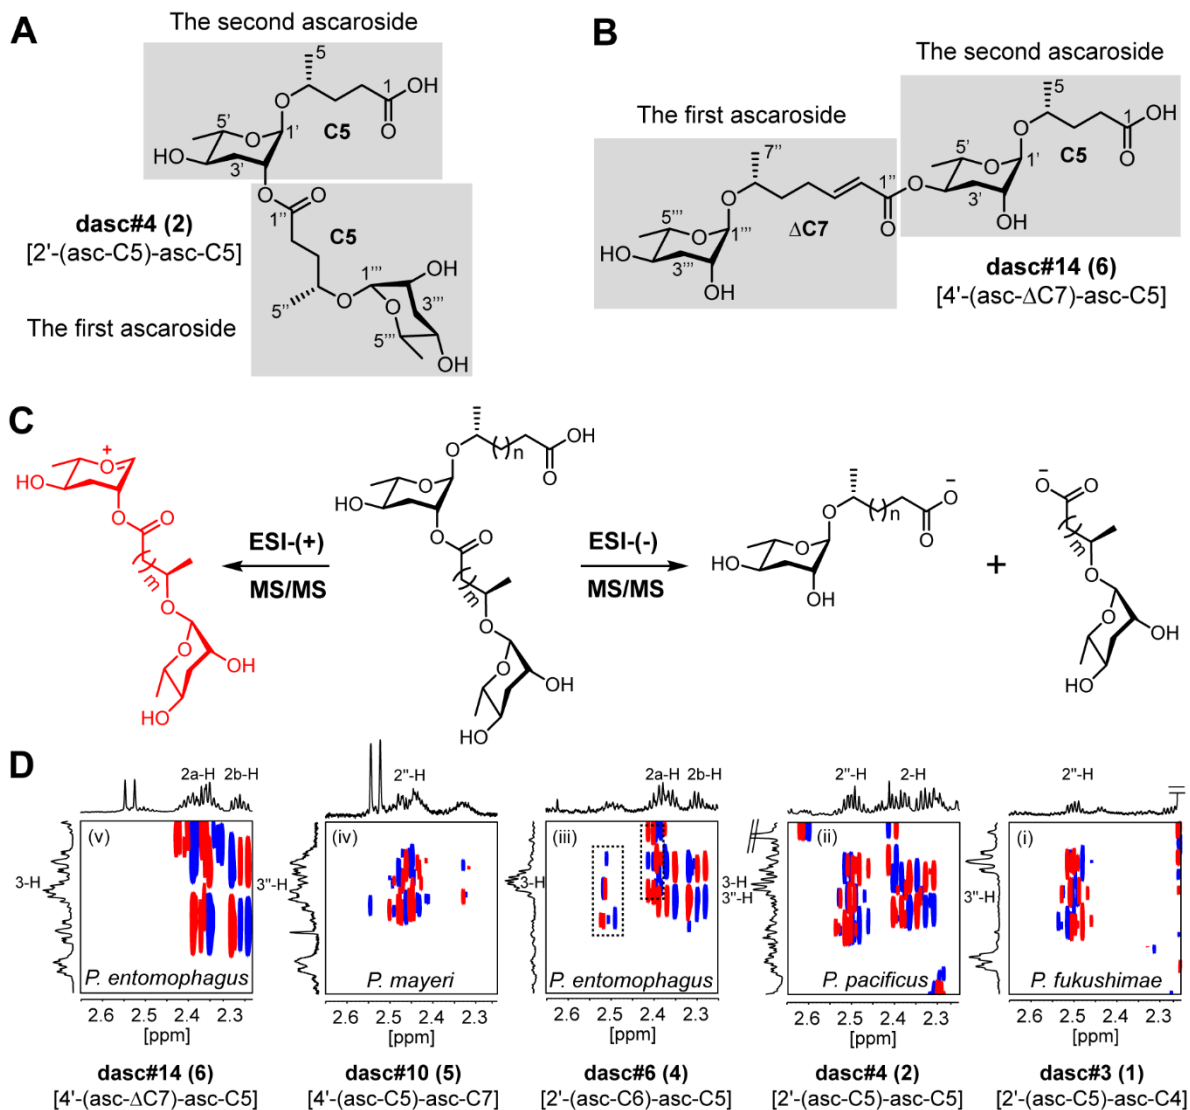

Supplement: supp [file elife-55687-supp-v1.zip]

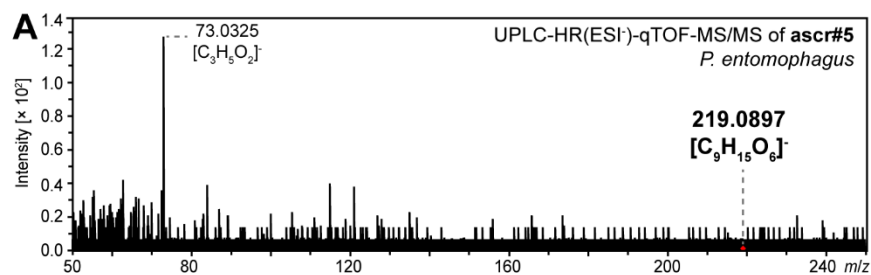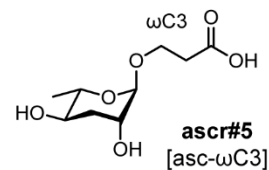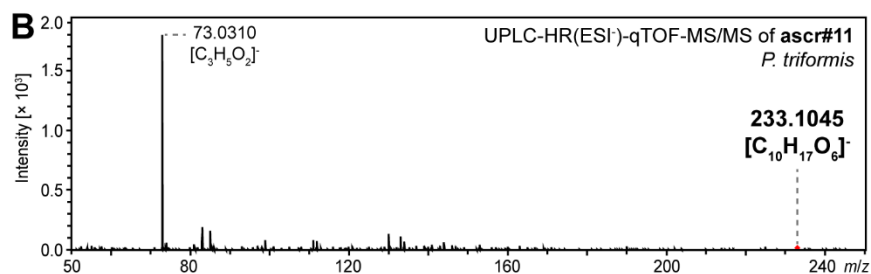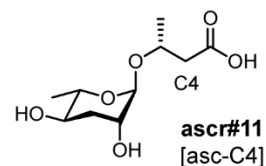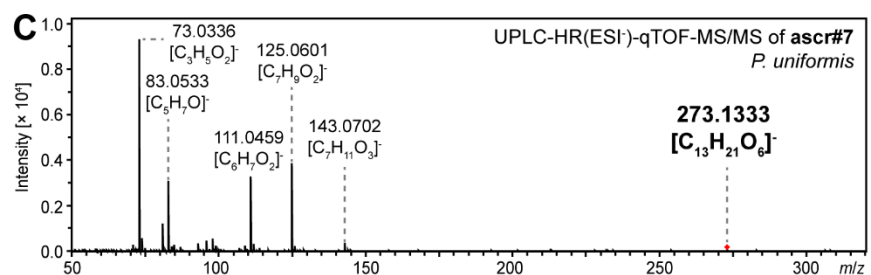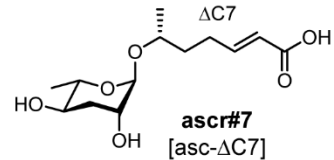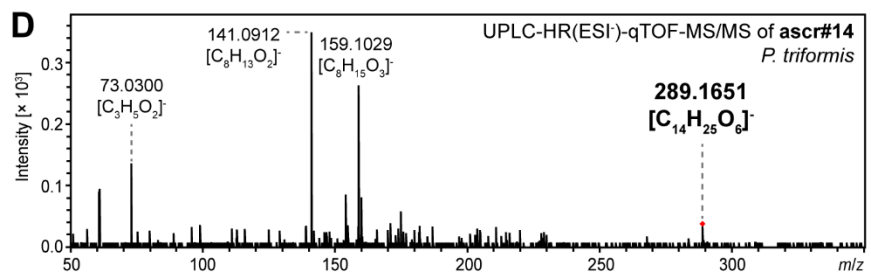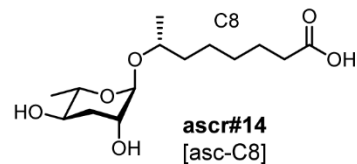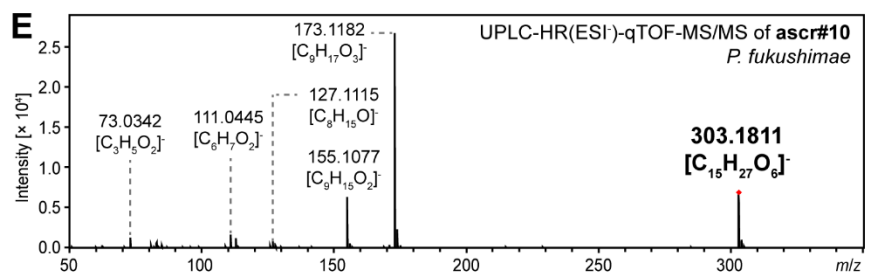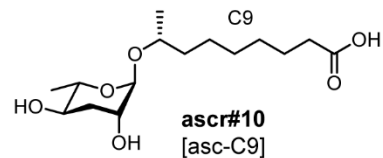

Supplement: supp [file elife-55687-supp-v1.zip]

**A**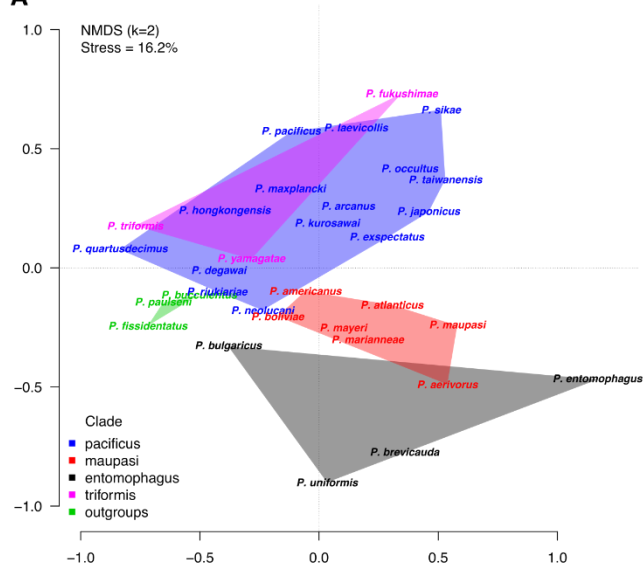**B**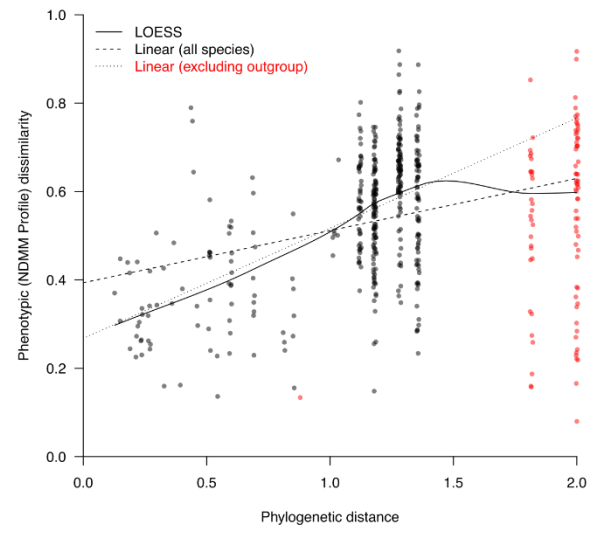

Supplement: supp [file elife-55687-supp-v1.zip]

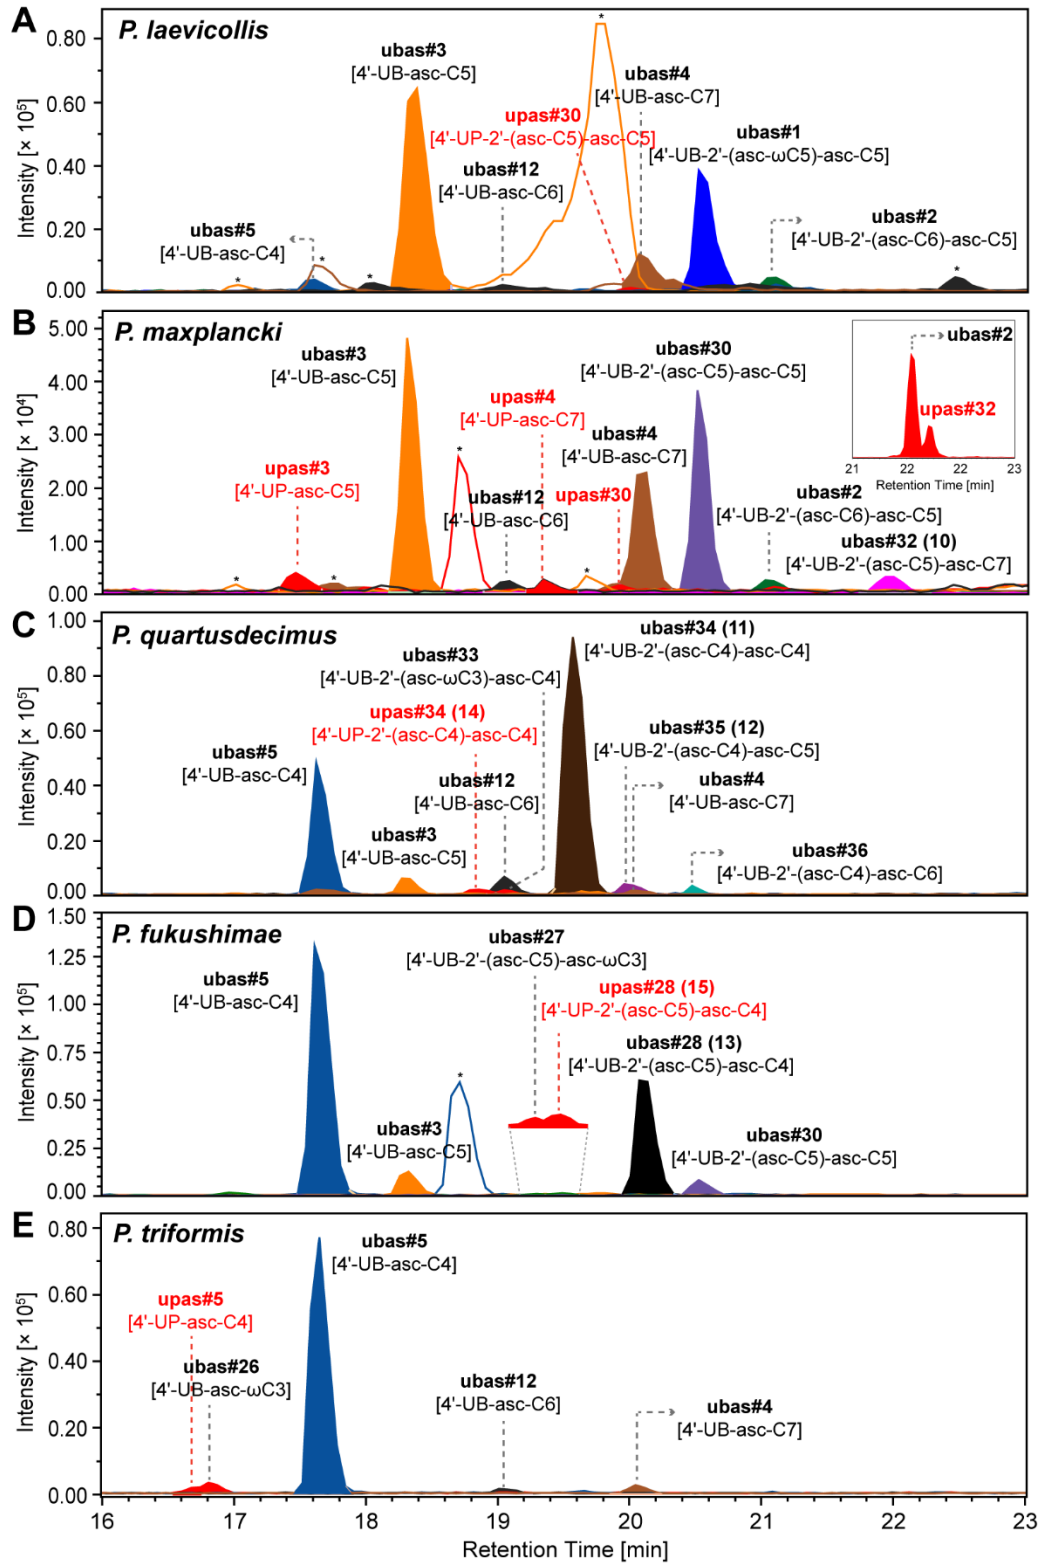

Supplement: supp [file elife-55687-supp-v1.zip]

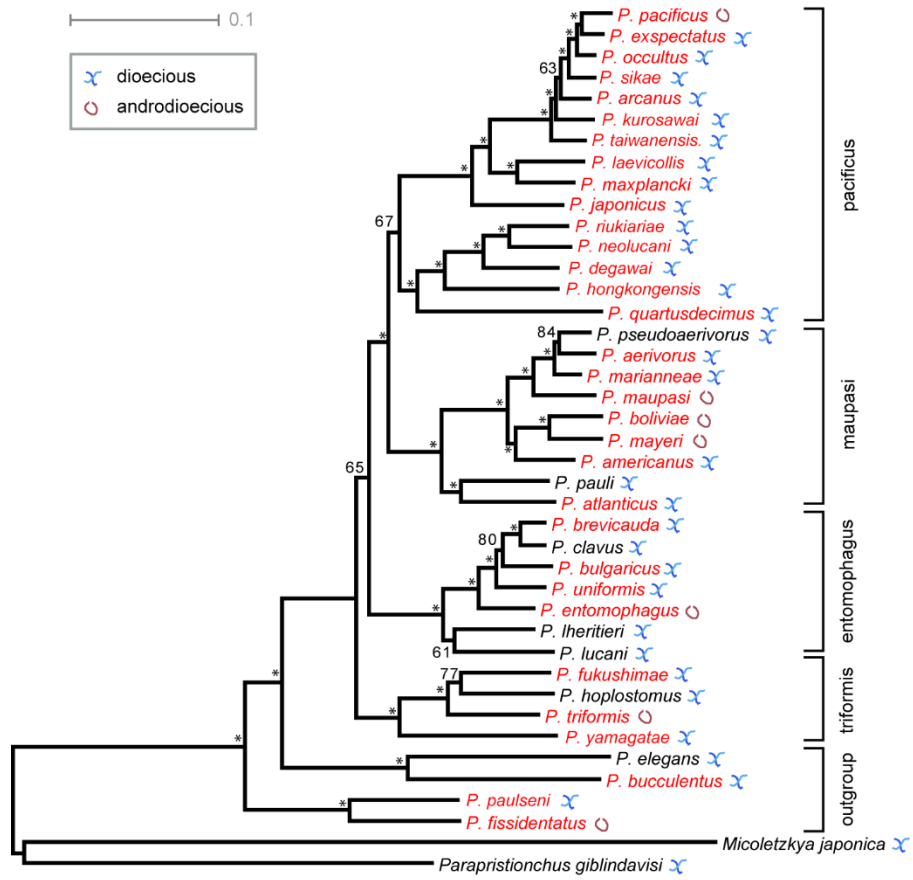

Supplement: supp [file elife-55687-supp-v1.zip]

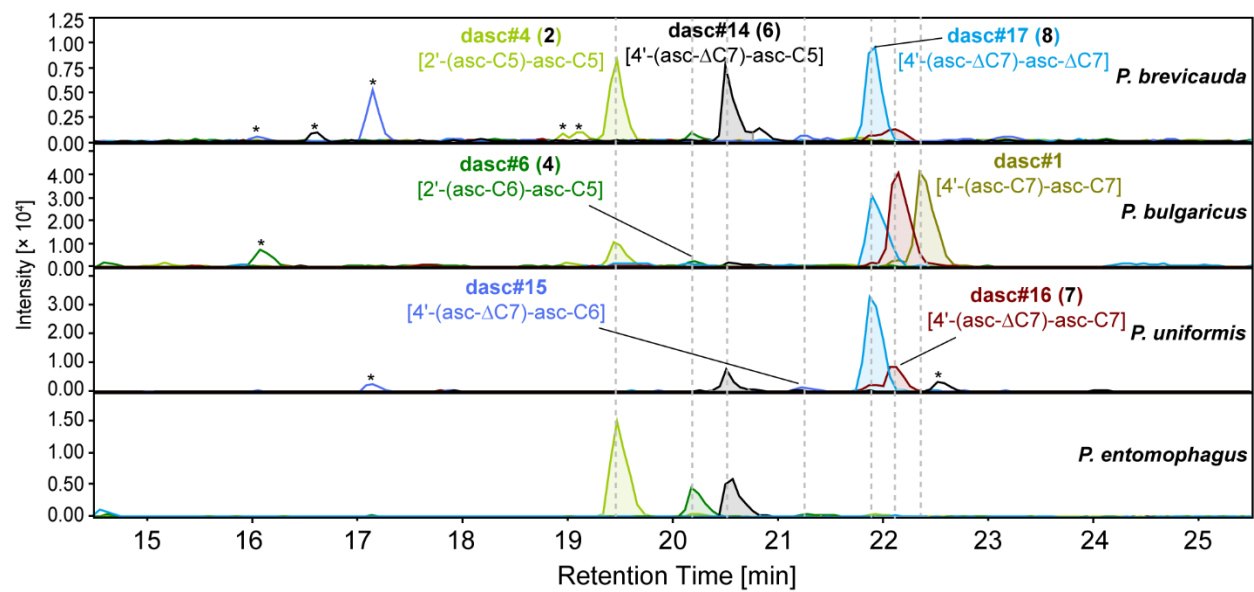

Supplement: supp [file elife-55687-supp-v1.zip]

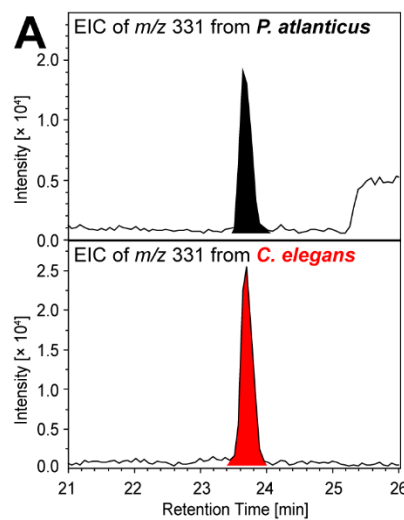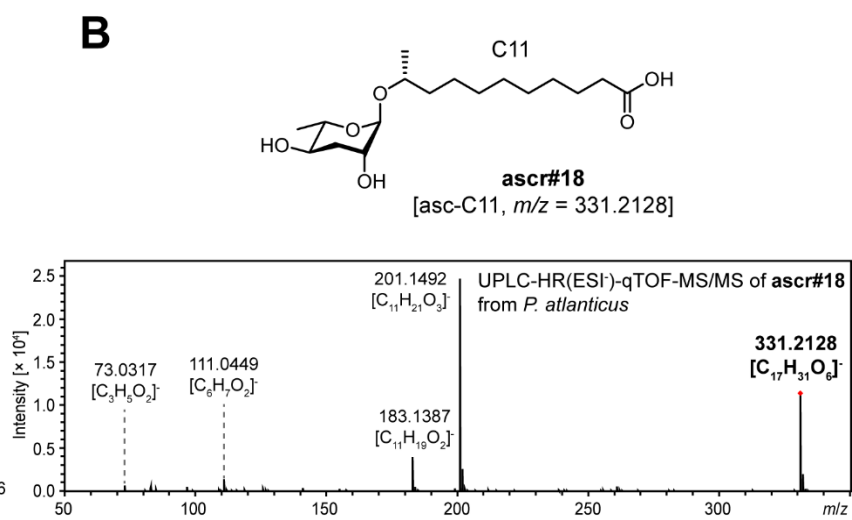

Supplement: supp [file elife-55687-supp-v1.zip › elife_poa_e55687_Figure_3_figure_supplement_2.pdf]

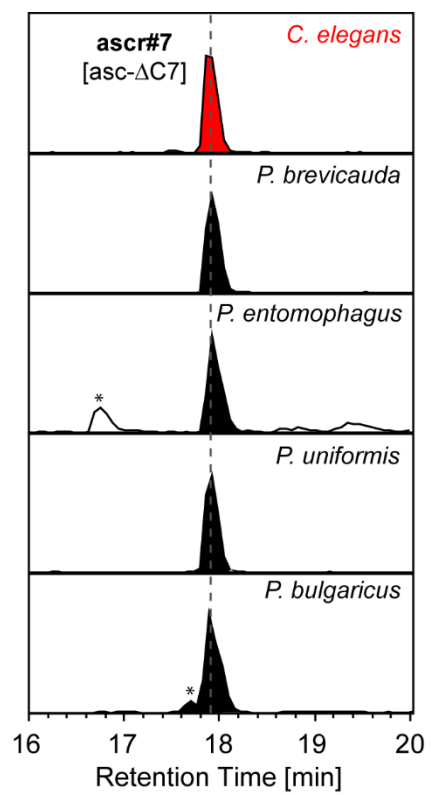

Supplement: supp [file elife-55687-supp-v1.zip › elife_poa_e55687_Figure_3_figure_supplement_3.pdf]

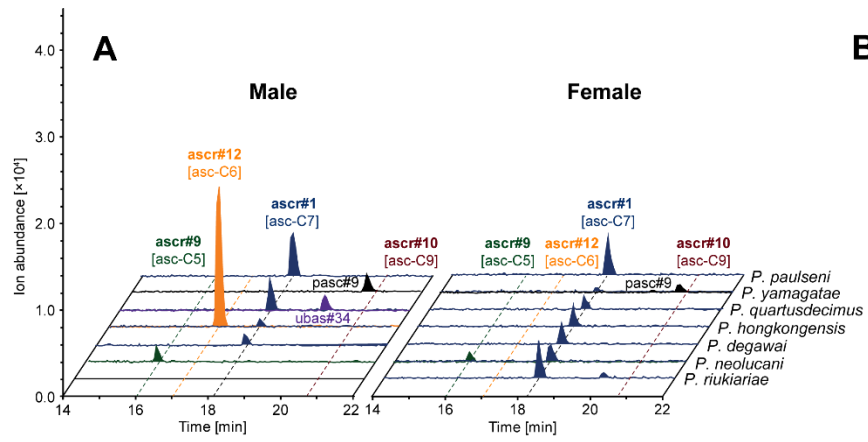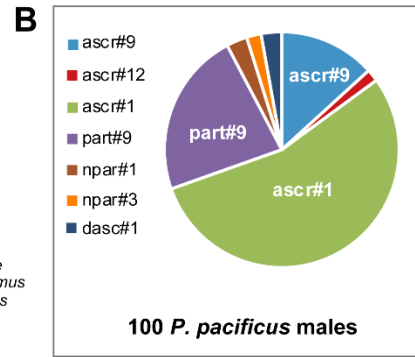

Supplement: supp [file elife-55687-supp-v1.zip › elife_poa_e55687_Figure_3_figure_supplement_4.pdf]

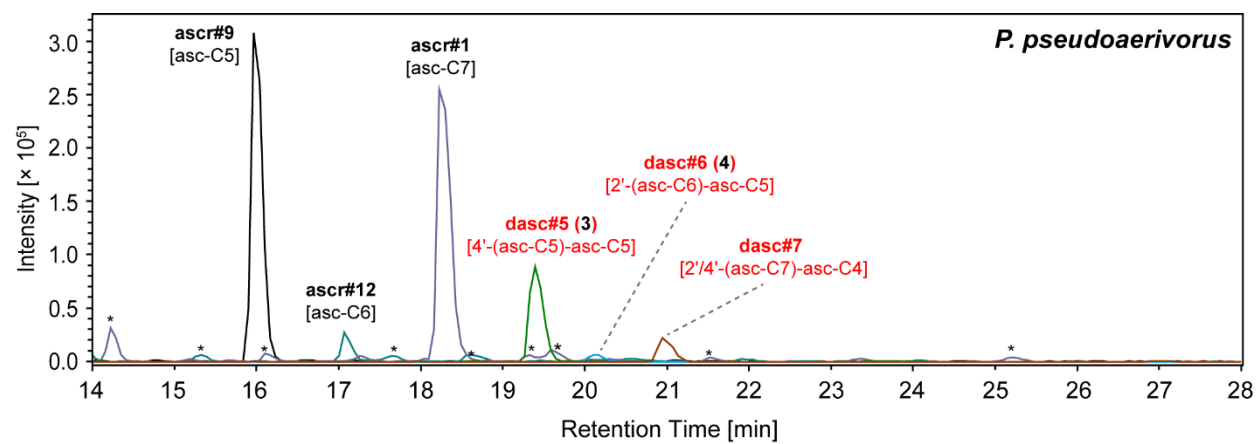

Supplement: supp [file elife-55687-supp-v1.zip › elife_poa_e55687_Figure_4_figure_supplement_2.pdf]

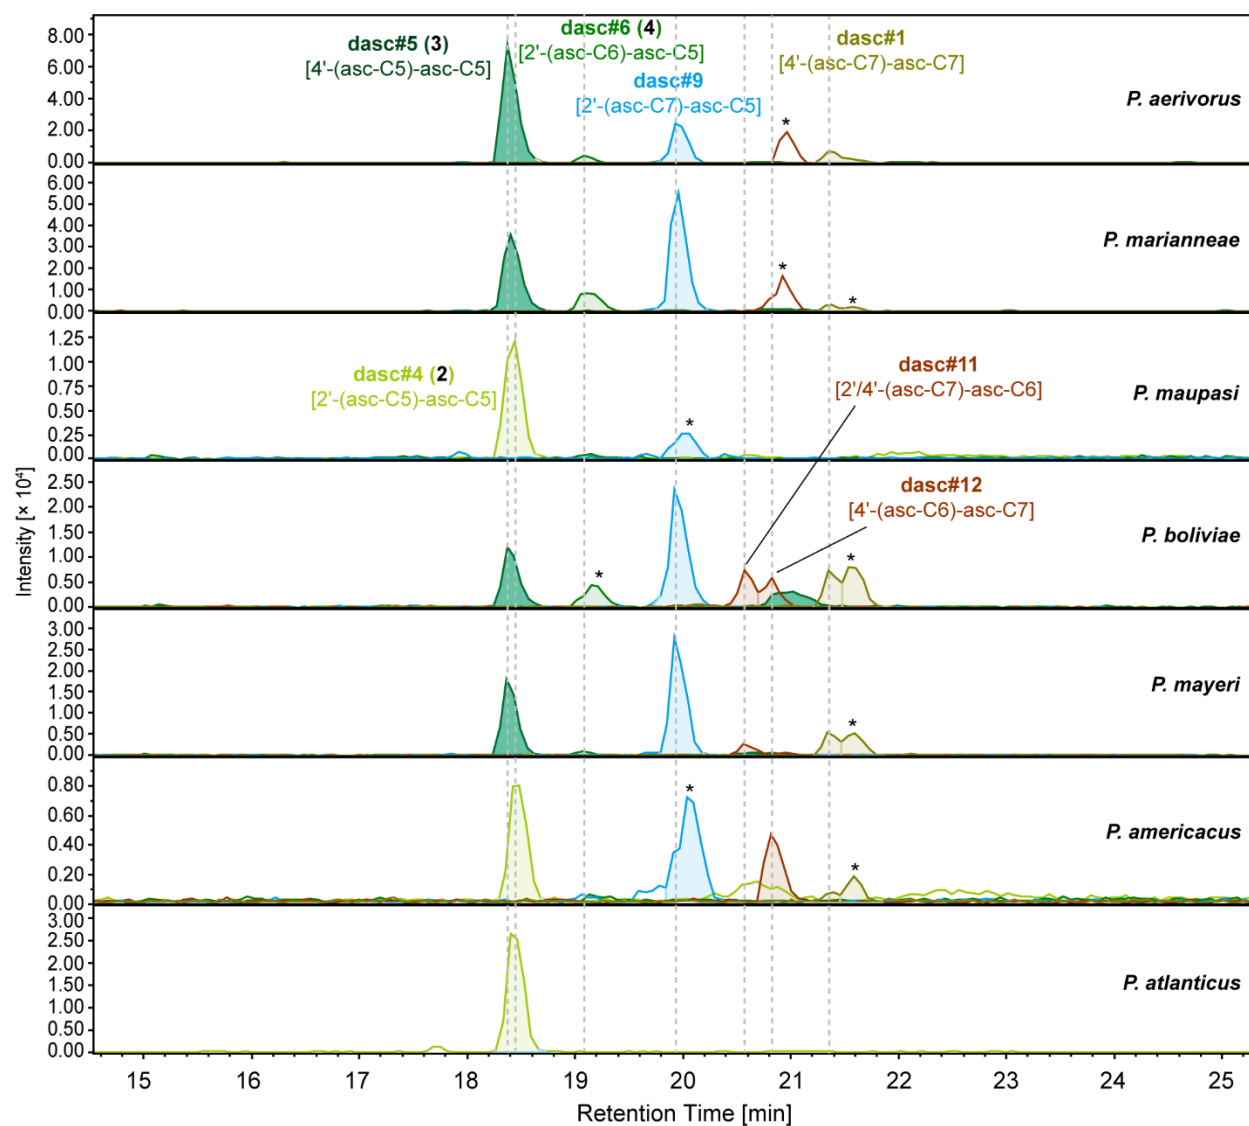

Supplement: supp [file elife-55687-supp-v1.zip › elife_poa_e55687_Figure_4_figure_supplement_3.pdf]

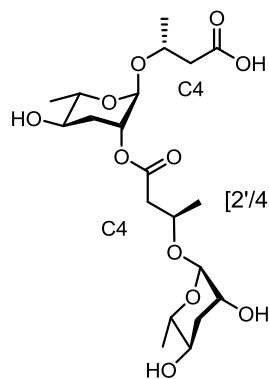

**dasc#2**  
[2'/4'-(asc-C4)-asc-C4]

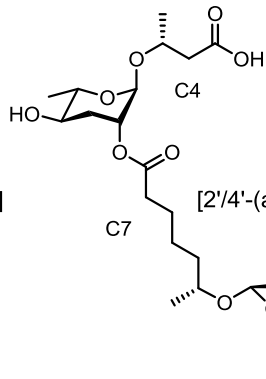

**dasc#7**  
[2'/4'-(asc-C7)-asc-C4]

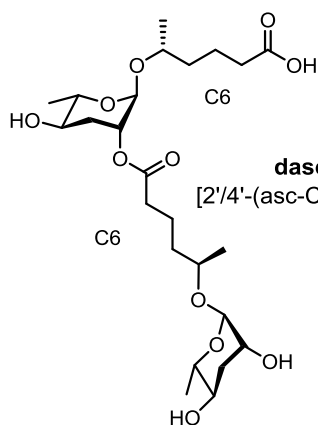

**dasc#8**  
[2'/4'-(asc-C6)-asc-C6]

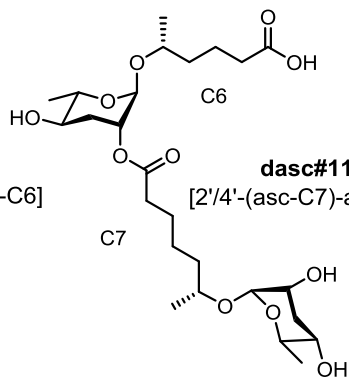

**dasc#11**  
[2'/4'-(asc-C7)-asc-C6]

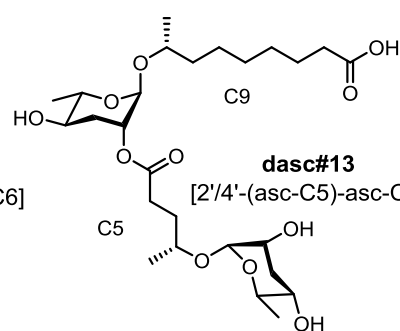

**dasc#13**  
[2'/4'-(asc-C5)-asc-C9]

Supplement: supp [file elife-55687-supp-v1.zip › elife_poa_e55687_Figure_4_figure_supplement_5.pdf]

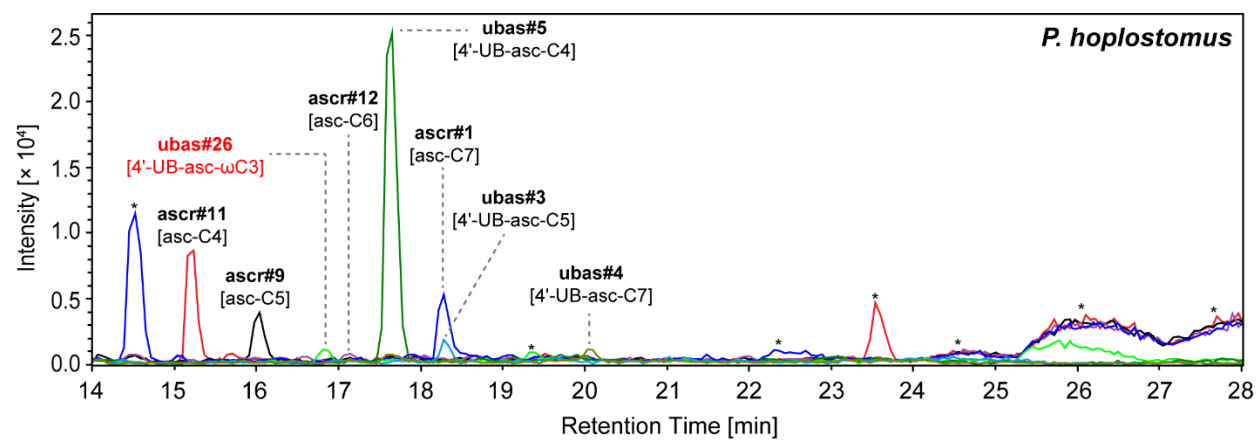

Supplement: supp [file elife-55687-supp-v1.zip › elife_poa_e55687_Figure_5_figure_supplement_2.pdf]

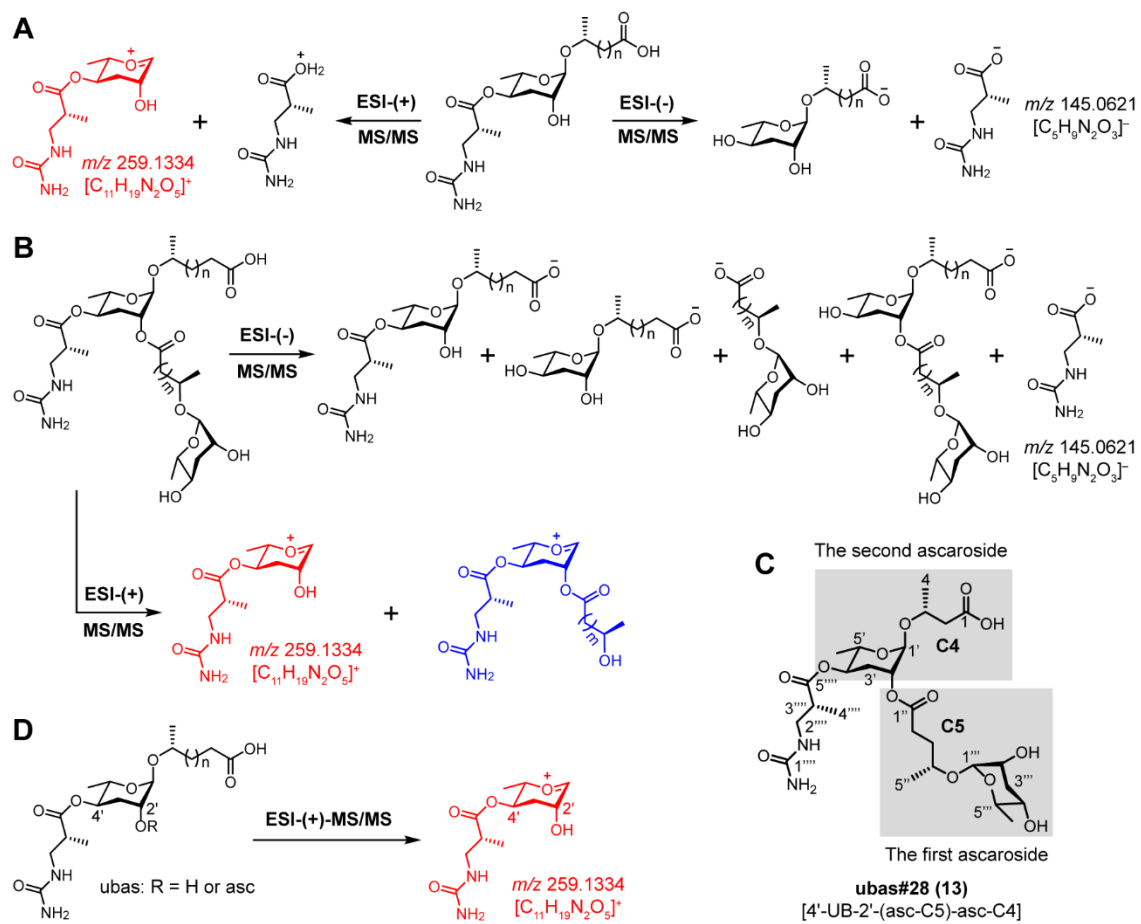

Supplement: supp [file elife-55687-supp-v1.zip › elife_poa_e55687_Figure_5_figure_supplement_3.pdf]

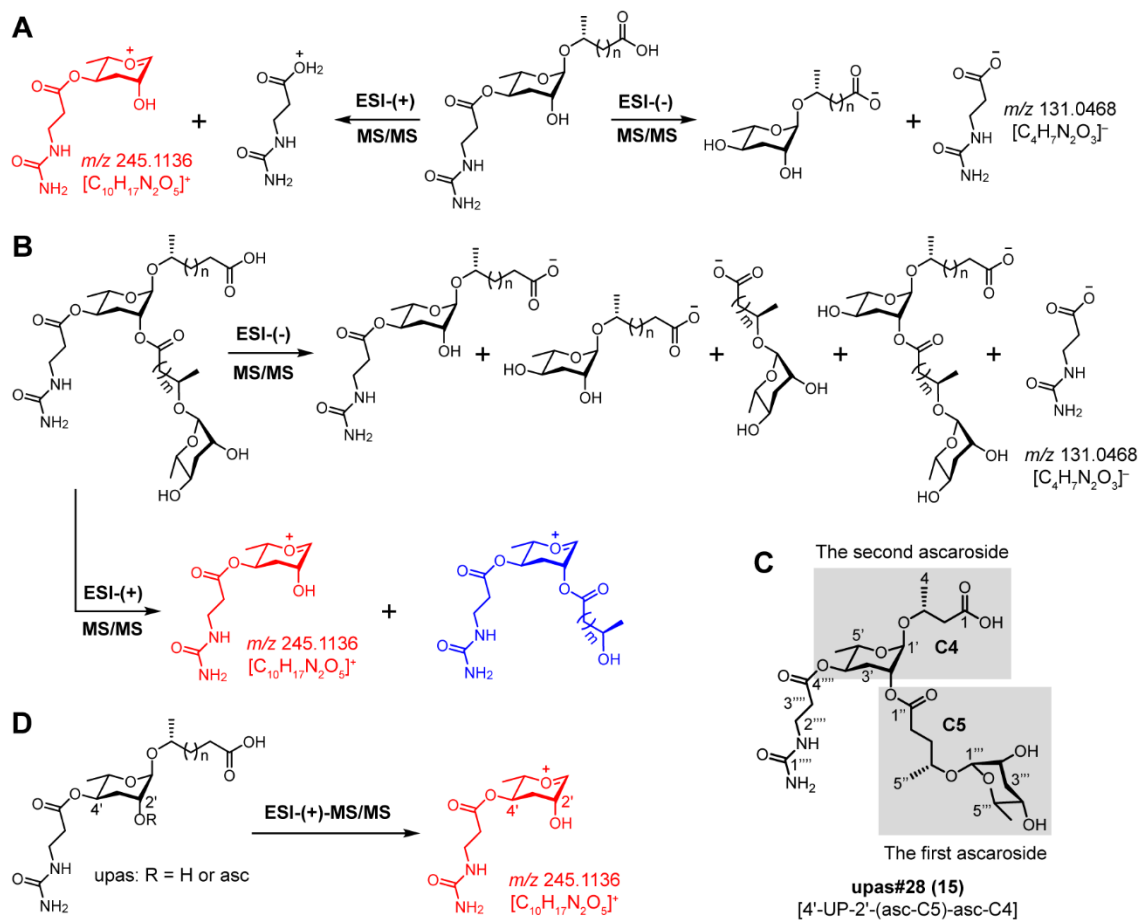

Supplement: supp [file elife-55687-supp-v1.zip › elife_poa_e55687_Figure_5_figure_supplement_5.pdf]
